# Supplementary material for: Transcriptome study of oleanolic acid in the inhibition of breast tumor growth based on high-throughput sequencing
Source: Aging (Albany NY). 2021 Oct 4;13(19):22883–97. doi: 10.18632/aging.203582 (PMC8544337; doi:10.18632/aging.203582)
Supplement: Supplementary Table 1 [file aging-13-203582-s001.xlsx]

## Sheet: up
Supplementary Table 1. Details of identified DEGs in response to OA treatment in MCF-7 cells.
id	baseMean	baseMean_OA	baseMean_CK	foldChange(CK/OA)(CK/OA)	log2FoldChange	pval	padj	Chromosome	Start Site	End Site	Direction	Length	Name	GO	KEGG	EC	eggNOG	eggNOG_Class	Description	NCBI_GI	UniProtID
ENSG00000136689	10.7863	21.0447	0.52799	0.025089	-5.3168	3.23736e-05	0.000929016	2	113107214	113134016	+	3256	IL1RN	GO:0002437;GO:0005125;GO:0005125;GO:0005125;GO:0005149;GO:0005149;GO:0005149;GO:0005150;GO:0005151;GO:0005152;GO:0005152;GO:0005152;GO:0005152;GO:0005152;GO:0005515;GO:0005576;GO:0005615;GO:0005615;GO:0005615;GO:0005615;GO:0005737;GO:0005886;GO:0006954;GO:0006954;GO:0006954;GO:0006955;GO:0006955;GO:0006955;GO:0007165;GO:0019221;GO:0034115;GO:0045352;GO:0045353;GO:0051384;GO:0070062;GO:0070498;GO:…	K05481	-	NOG46710	S	interleukin 1 receptor antagonist [Source:HGNCSymbol;Acc:HGNC:6000]	3557	P18510
ENSG00000167723	7.94147	15.3708	0.512095	0.033316	-4.90764	0.000749518	0.0128721	17	3510502	3557812	-	9597	TRPV3	GO:0005216;GO:0006811;GO:0009266;GO:0016020;GO:0016021;GO:0016021;GO:0034220;GO:0005216;GO:0005216;GO:0005216;GO:0005262;GO:0005262;GO:0005515;GO:0005886;GO:0005887;GO:0006811;GO:0006811;GO:0006811;GO:0006816;GO:0009266;GO:0009266;GO:0016020;GO:0016020;GO:0016020;GO:0016021;GO:0016021;GO:0016021;GO:0042636;GO:0043235;GO:0055085;GO:0055085;GO:0070588;GO:0070588;GO:0005216;GO:0005216;GO:0005515;GO:…	K04972	-	NOG278734	-	transient receptor potential cation channelsubfamily V member 3 [Source:HGNC Symbol;Acc:HGNC:18084]	162514	Q8NET8
ENSG00000157873	175.148	336.853	13.4416	0.0399035	-4.64734	2.58113e-35	5.03675e-32	1	2555639	2565382	+	6219	TNFRSF14	GO:0005515;GO:0005515;GO:0016020;GO:0016021;GO:0005515;GO:0016020;GO:0016021;GO:0005515;GO:0016020;GO:0016021;GO:0005515;GO:0001618;GO:0002250;GO:0002376;GO:0002741;GO:0005031;GO:0005515;GO:0005515;GO:0005515;GO:0005886;GO:0005886;GO:0006955;GO:0007166;GO:0009897;GO:0016020;GO:0016021;GO:0016032;GO:0019955;GO:0031295;GO:0031295;GO:0031625;GO:0033209;GO:0045087;GO:0046642;GO:0046718;GO:0050731;GO:…	K05152	-	NOG40150	S	TNF receptor superfamily member 14 [Source:HGNCSymbol;Acc:HGNC:11912]	8764	Q92956;A0A024R052
ENSG00000129910	6.01238	11.5127	0.512095	0.044481	-4.49067	0.00594555	0.0664856	16	89171748	89195492	+	4647	CDH15	GO:0000902;GO:0005509;GO:0005509;GO:0005509;GO:0005515;GO:0005794;GO:0005886;GO:0005886;GO:0005886;GO:0005886;GO:0005886;GO:0005886;GO:0005886;GO:0005901;GO:0005912;GO:0007043;GO:0007155;GO:0007155;GO:0007155;GO:0007155;GO:0007156;GO:0007156;GO:0007156;GO:0007275;GO:0008092;GO:0009986;GO:0016020;GO:0016020;GO:0016020;GO:0016021;GO:0016339;GO:0016342;GO:0031594;GO:0034332;GO:0034332;GO:0044331;GO:…	K06809	-	NOG306443	-	cadherin 15 [Source:HGNC Symbol;Acc:HGNC:1754]"	1013	P55291
ENSG00000244242	16.6988	31.8454	1.55218	0.0487411	-4.35872	6.46377e-05	0.00167982	11	1732406	1750595	-	4792	IFITM10	GO:0005886;GO:0005886;GO:0016020;GO:0016021;GO:0016021;GO:0016021;	K06566	-	NOG44163	T	interferon induced transmembrane protein 10[Source:HGNC Symbol;Acc:HGNC:40022]	402778	A6NMD0
ENSG00000128965	365.927	696.012	35.8432	0.051498	-4.27934	1.94404e-60	1.51742e-56	15	40952962	40956512	+	2051	CHAC1	GO:0003839;GO:0003839;GO:0003839;GO:0005112;GO:0005515;GO:0005737;GO:0005737;GO:0005794;GO:0005802;GO:0005829;GO:0005829;GO:0006750;GO:0006751;GO:0006751;GO:0006751;GO:0006915;GO:0006986;GO:0007219;GO:0007399;GO:0010955;GO:0016829;GO:0022008;GO:0045746;GO:0061928;GO:0070059;GO:0003839;GO:0003839;GO:0003839;GO:0005112;GO:0005112;GO:0005515;GO:0005737;GO:0005737;GO:0005794;GO:0005802;GO:0005802;GO:…	K07232	EC:4.3.2.7	COG3703	P	ChaC glutathione specific gamma-glutamylcyclotransferase 1 [Source:HGNCSymbol;Acc:HGNC:28680]	79094	Q9BUX1;A0A2R8Y1G7
ENSG00000140832	5.11249	9.69699	0.52799	0.0544489	-4.19895	0.04549	0.276042	16	71626161	71642114	+	6446	MARVELD3	GO:0005515;GO:0005923;GO:0005923;GO:0005923;GO:0006970;GO:0010633;GO:0016020;GO:0016020;GO:0016021;GO:0030054;GO:0031410;GO:0031435;GO:0045216;GO:0046329;GO:0050680;GO:0070830;GO:1902414;GO:0005515;GO:0005923;GO:0005923;GO:0005923;GO:0006970;GO:0010633;GO:0016020;GO:0016020;GO:0016020;GO:0016021;GO:0030054;GO:0031410;GO:0031435;GO:0045216;GO:0046329;GO:0050680;GO:0070830;GO:1902414;GO:0005515;GO:…	K21099	-	NOG45280	S	MARVEL domain containing 3 [Source:HGNCSymbol;Acc:HGNC:30525]	91862	Q96A59
ENSG00000100968	12.5258	23.5153	1.53628	0.0653312	-3.93608	9.66287e-05	0.00230677	14	24365673	24379604	+	8437	NFATC4	GO:0000122;GO:0000790;GO:0000978;GO:0000978;GO:0000981;GO:0000981;GO:0001227;GO:0001227;GO:0001569;GO:0001816;GO:0003677;GO:0003677;GO:0003677;GO:0003682;GO:0003700;GO:0003700;GO:0003700;GO:0003700;GO:0003700;GO:0003713;GO:0005515;GO:0005515;GO:0005634;GO:0005634;GO:0005634;GO:0005634;GO:0005634;GO:0005667;GO:0005667;GO:0005737;GO:0005737;GO:0005829;GO:0005829;GO:0005829;GO:0005829;GO:0005829;GO:…	K17334	-	NOG70055	-	nuclear factor of activated T cells 4 [Source:HGNCSymbol;Acc:HGNC:7778]	4776	Q14934
ENSG00000130513	533.389	996.481	70.2966	0.0705448	-3.82532	2.79838e-71	4.36854e-67	19	18374731	18389176	+	2087	GDF15	GO:0000187;GO:0000187;GO:0002023;GO:0002023;GO:0005125;GO:0005125;GO:0005125;GO:0005515;GO:0005515;GO:0005576;GO:0005576;GO:0005576;GO:0005615;GO:0005615;GO:0005634;GO:0005737;GO:0005794;GO:0007165;GO:0007179;GO:0007267;GO:0008083;GO:0008083;GO:0008083;GO:0010862;GO:0030509;GO:0035860;GO:0040015;GO:0040015;GO:0042803;GO:0042803;GO:0043410;GO:0051897;GO:0060395;GO:0060395;GO:0060400;GO:0060400;GO:…	K05504	-	NOG235805	-	growth differentiation factor 15 [Source:HGNCSymbol;Acc:HGNC:30142]	9518	Q99988
ENSG00000170681	34.3488	62.9534	5.74431	0.091247	-3.45408	1.07479e-09	8.18468e-08	9	100578079	100588389	+	3098	CAVIN4	GO:0005515;GO:0005737;GO:0005737;GO:0005737;GO:0005829;GO:0005886;GO:0005886;GO:0005886;GO:0005901;GO:0005901;GO:0005901;GO:0007275;GO:0007517;GO:0010468;GO:0016020;GO:0030017;GO:0030018;GO:0030154;GO:0035023;GO:0035023;GO:0042383;GO:0045944;	-	-	NOG25053	-	caveolae associated protein 4 [Source:HGNCSymbol;Acc:HGNC:33742]	347273	Q5BKX8
ENSG00000171094	9.18621	16.8202	1.55218	0.0922805	-3.43783	0.00247493	0.0339713	2	29192774	29921586	-	7382	ALK	GO:0000187;GO:0000187;GO:0004672;GO:0004672;GO:0004713;GO:0004713;GO:0004714;GO:0004714;GO:0004714;GO:0005524;GO:0005524;GO:0006468;GO:0006468;GO:0007165;GO:0007165;GO:0007169;GO:0007169;GO:0016020;GO:0016020;GO:0016021;GO:0016301;GO:0016310;GO:0016310;GO:0016310;GO:0018108;GO:0048666;GO:0048666;GO:0000166;GO:0000187;GO:0000187;GO:0000187;GO:0004672;GO:0004672;GO:0004704;GO:0004713;GO:0004713;GO:…	K05119	EC:2.7.10.1	COG0515	T	ALK receptor tyrosine kinase [Source:HGNCSymbol;Acc:HGNC:427]	238	Q9UM73;B6D4Y2
ENSG00000120738	205.74	370.052	41.4285	0.111953	-3.15903	0.000540255	0.0097832	5	138465479	138469303	+	3137	EGR1	GO:0000122;GO:0000790;GO:0000790;GO:0000976;GO:0000977;GO:0000977;GO:0000977;GO:0000981;GO:0000981;GO:0000981;GO:0001228;GO:0001228;GO:0001666;GO:0001666;GO:0002931;GO:0002931;GO:0003676;GO:0003676;GO:0003677;GO:0003677;GO:0003700;GO:0003700;GO:0005515;GO:0005515;GO:0005634;GO:0005634;GO:0005634;GO:0005634;GO:0005654;GO:0005654;GO:0005737;GO:0005737;GO:0006355;GO:0006357;GO:0006366;GO:0008270;GO:…	K09203	-	COG5048	R	early growth response 1 [Source:HGNCSymbol;Acc:HGNC:3238]	1958	P18146;Q546S1
ENSG00000167995	7.49181	13.4314	1.55218	0.115563	-3.11325	0.0117388	0.109602	11	61950063	61965515	+	8688	BEST1	GO:0005254;GO:0005254;GO:0005254;GO:0005886;GO:0006811;GO:0006821;GO:0034707;GO:1902476;GO:1902476;GO:0005254;GO:0005254;GO:0005254;GO:0005254;GO:0005254;GO:0005829;GO:0005886;GO:0005886;GO:0006811;GO:0006821;GO:0006821;GO:0007601;GO:0007601;GO:0016020;GO:0016020;GO:0016021;GO:0016021;GO:0016323;GO:0030321;GO:0034220;GO:0034707;GO:0034707;GO:0042802;GO:0050896;GO:1902476;GO:1902476;GO:0005254;GO:…	K13878	-	NOG315004	-	bestrophin 1 [Source:HGNC Symbol;Acc:HGNC:12703]"	7439	O76090
ENSG00000070669	49.4179	88.4033	10.4326	0.118012	-3.083	1.80832e-10	1.53422e-08	7	97851677	97872542	-	4896	ASNS	GO:0000166;GO:0001889;GO:0004066;GO:0004066;GO:0004066;GO:0004066;GO:0004066;GO:0004066;GO:0005515;GO:0005524;GO:0005829;GO:0005829;GO:0005829;GO:0006520;GO:0006529;GO:0006529;GO:0006529;GO:0006529;GO:0006529;GO:0006529;GO:0006541;GO:0008652;GO:0008652;GO:0009416;GO:0009612;GO:0009636;GO:0016874;GO:0031427;GO:0031667;GO:0032354;GO:0032870;GO:0036499;GO:0042149;GO:0042149;GO:0042802;GO:0043066;GO:…	K01953	EC:6.3.5.4	COG0367	E	asparagine synthetase (glutamine-hydrolyzing)[Source:HGNC Symbol;Acc:HGNC:753]	440	P08243
ENSG00000134258	6.81867	12.0852	1.55218	0.128437	-2.96087	0.0220046	0.170733	1	117143587	117210960	-	3027	VTCN1	GO:0016020;GO:0016021;GO:0001562;GO:0001817;GO:0002250;GO:0002376;GO:0003674;GO:0005102;GO:0005102;GO:0005886;GO:0009897;GO:0009897;GO:0009897;GO:0016020;GO:0016021;GO:0042102;GO:0042130;GO:0043066;GO:0050776;GO:0050852;GO:0050868;GO:0050868;GO:0072602;GO:0072643;GO:1900042;GO:0001817;GO:0002250;GO:0002376;GO:0003674;GO:0005102;GO:0005886;GO:0009897;GO:0009897;GO:0016020;GO:0016021;GO:0042130;GO:…	K06747	-	NOG87575	S	V-set domain containing T cell activation inhibitor1 [Source:HGNC Symbol;Acc:HGNC:28873]	79679	Q7Z7D3
ENSG00000130701	22.6307	40.1088	5.15274	0.128469	-2.96051	9.57277e-06	0.00032207	20	62410237	62427539	-	2799	RBBP8NL	GO:0005615;	-	-	NOG28753	S	RBBP8 N-terminal like [Source:HGNCSymbol;Acc:HGNC:16144]	140893	Q8NC74
ENSG00000163395	104.188	183.893	24.4817	0.13313	-2.90909	3.74731e-20	9.74988e-18	1	201190824	201228952	+	12117	IGFN1	GO:0005515;GO:0005515;GO:0005634;GO:0005737;GO:0008150;GO:0030017;GO:0030018;GO:0005515;GO:0005634;GO:0005737;GO:0008150;GO:0030017;GO:0030018;GO:0005515;GO:0005515;GO:0005634;GO:0005737;GO:0008150;GO:0030017;GO:0030018;	-	-	NOG12793	-	immunoglobulin like and fibronectin type III domaincontaining 1 [Source:HGNC Symbol;Acc:HGNC:24607]	91156	Q86VF2
ENSG00000103316	15.3816	27.1467	3.61645	0.133219	-2.90813	0.00256169	0.034835	16	21238874	21303083	-	3782	CRYM	GO:0000122;GO:0003714;GO:0005515;GO:0005737;GO:0005737;GO:0005782;GO:0005829;GO:0006554;GO:0007605;GO:0016491;GO:0016639;GO:0042403;GO:0042562;GO:0042803;GO:0047127;GO:0047127;GO:0050661;GO:0055114;GO:0070062;GO:0070324;GO:0070324;GO:0070327;GO:0000122;GO:0003714;GO:0005515;GO:0005634;GO:0005737;GO:0005737;GO:0005739;GO:0005782;GO:0005829;GO:0006554;GO:0007605;GO:0016491;GO:0016639;GO:0042403;GO:…	K18258	EC:1.5.1.25	COG2423	E	crystallin mu [Source:HGNC Symbol;Acc:HGNC:2418]"	1428	Q14894
ENSG00000168925	6.57366	11.5951	1.55218	0.133865	-2.90115	0.0272276	0.19651	16	75218988	75226338	+	2196	CTRB1	GO:0004252;GO:0004252;GO:0004252;GO:0005576;GO:0005576;GO:0005615;GO:0006508;GO:0006508;GO:0006508;GO:0007586;GO:0008233;GO:0008236;GO:0009235;GO:0016787;GO:0022617;GO:0004252;GO:0004252;GO:0006508;GO:0006508;	K01310	EC:3.4.21.1	COG5640	O	chymotrypsinogen B1 [Source:HGNCSymbol;Acc:HGNC:2521]	1504	P17538
ENSG00000152377	8.79531	15.4946	2.09606	0.135277	-2.88601	0.0449232	0.273303	5	136975298	137598379	-	6200	SPOCK1	GO:0001558;GO:0001764;GO:0004867;GO:0004869;GO:0005509;GO:0005509;GO:0005509;GO:0005509;GO:0005515;GO:0005518;GO:0005576;GO:0005615;GO:0005615;GO:0005737;GO:0007155;GO:0007399;GO:0008191;GO:0010812;GO:0010951;GO:0010977;GO:0014069;GO:0016528;GO:0021953;GO:0022008;GO:0031594;GO:0033268;GO:0048856;GO:0050840;GO:0005509;GO:0005509;GO:0005515;GO:0005515;	K08136	-	NOG244822	-	SPARC (osteonectin), cwcv and kazal like domainsproteoglycan 1 [Source:HGNC Symbol;Acc:HGNC:11251]	6695	Q08629
ENSG00000164949	669.849	1177.48	162.221	0.13777	-2.85966	3.12264e-14	4.23892e-12	8	94249253	94262350	-	2648	GEM	GO:0000166;GO:0000278;GO:0000287;GO:0003924;GO:0003924;GO:0003924;GO:0003924;GO:0005246;GO:0005515;GO:0005515;GO:0005516;GO:0005525;GO:0005525;GO:0005525;GO:0005525;GO:0005525;GO:0005525;GO:0005623;GO:0005886;GO:0005886;GO:0006955;GO:0007165;GO:0007165;GO:0007165;GO:0007166;GO:0009898;GO:0016020;GO:0016020;GO:0016020;GO:0019003;GO:0030496;GO:0051233;GO:0051276;GO:0051310;GO:0072686;GO:1901842;GO:…	K07846	-	COG1100	R	GTP binding protein overexpressed in skeletal muscle[Source:HGNC Symbol;Acc:HGNC:4234]	2669	P55040;A0A024R9F5
ENSG00000139269	49.6849	87	12.3698	0.142181	-2.8142	3.13061e-10	2.59957e-08	12	57452323	57459280	+	3046	INHBE	GO:0005576;GO:0007165;GO:0008083;GO:0008083;GO:0008083;GO:0005125;GO:0005179;GO:0005179;GO:0005179;GO:0005576;GO:0005576;GO:0005576;GO:0005615;GO:0008083;GO:0008083;GO:0008083;GO:0010862;GO:0060395;GO:0062023;	K22689	-	NOG296956	-	inhibin subunit beta E [Source:HGNCSymbol;Acc:HGNC:24029]	83729	P58166
ENSG00000134769	7.78674	13.4933	2.08017	0.154163	-2.69747	0.020759	0.163588	18	34493290	34891844	+	12634	DTNA	GO:0005515;GO:0005515;GO:0005737;GO:0005886;GO:0006941;GO:0007165;GO:0007268;GO:0007274;GO:0008270;GO:0008270;GO:0016020;GO:0030054;GO:0032991;GO:0045202;GO:0046872;GO:0005515;GO:0005515;GO:0005737;GO:0005886;GO:0006941;GO:0007165;GO:0007268;GO:0007274;GO:0008270;GO:0016020;GO:0030054;GO:0032991;GO:0045202;GO:0046872;GO:0005515;GO:0005515;GO:0005737;GO:0005886;GO:0006941;GO:0007165;GO:0007268;GO:…	-	-	NOG251970	-	dystrobrevin alpha [Source:HGNCSymbol;Acc:HGNC:3057]	1837	Q9Y4J8
ENSG00000128165	232.055	401.958	62.1508	0.15462	-2.6932	3.85468e-34	6.01754e-31	22	50481543	50486440	+	4289	ADM2	GO:0001525;GO:0005179;GO:0005179;GO:0005179;GO:0005576;GO:0005576;GO:0005576;GO:0005576;GO:0006468;GO:0007186;GO:0010628;GO:0044877;GO:0045766;GO:0001525;GO:0005179;GO:0005179;GO:0005179;GO:0005576;GO:0005576;GO:0005576;GO:0005576;GO:0006468;GO:0007186;GO:0007189;GO:0007586;GO:0007631;GO:0010628;GO:0044877;GO:0045766;GO:0045776;	-	-	NOG44095	-	adrenomedullin 2 [Source:HGNCSymbol;Acc:HGNC:28898]	79924	Q7Z4H4
ENSG00000175197	222.887	384.488	61.2855	0.159395	-2.64932	2.38662e-32	2.66125e-29	12	57516588	57521737	-	1307	DDIT3	GO:0000122;GO:0000122;GO:0000790;GO:0000976;GO:0000978;GO:0000978;GO:0000981;GO:0001228;GO:0001228;GO:0003677;GO:0003677;GO:0003700;GO:0003700;GO:0003700;GO:0003700;GO:0003713;GO:0003714;GO:0005515;GO:0005515;GO:0005623;GO:0005634;GO:0005634;GO:0005654;GO:0005737;GO:0005737;GO:0005829;GO:0006355;GO:0006355;GO:0006355;GO:0006355;GO:0006357;GO:0006915;GO:0006974;GO:0006983;GO:0006986;GO:0007049;GO:…	K04452	-	NOG279524	-	DNA damage inducible transcript 3 [Source:HGNCSymbol;Acc:HGNC:2726]	1649	P35638;Q53YD1
ENSG00000135253	129.94	224.069	35.8114	0.159823	-2.64545	4.9263e-21	1.50793e-18	7	128862451	128910719	-	8376	KCP	GO:0002244;GO:0005515;GO:0005615;GO:0030513;GO:0005515;GO:0005576;GO:0005515;	-	-	-	-	kielin cysteine rich BMP regulator [Source:HGNCSymbol;Acc:HGNC:17585]	375616	Q6ZWJ8
ENSG00000182578	20.218	34.7393	5.69662	0.163982	-2.60839	0.00912272	0.0913501	5	150053291	150113372	-	5151	CSF1R	GO:0000166;GO:0004672;GO:0004714;GO:0005524;GO:0005524;GO:0006468;GO:0007169;GO:0016020;GO:0016021;GO:0018108;GO:0019221;GO:0019955;GO:0000166;GO:0001934;GO:0002244;GO:0002376;GO:0002931;GO:0002931;GO:0004672;GO:0004672;GO:0004713;GO:0004713;GO:0004713;GO:0004713;GO:0004714;GO:0004714;GO:0004714;GO:0004714;GO:0004714;GO:0005011;GO:0005011;GO:0005011;GO:0005011;GO:0005011;GO:0005515;GO:0005524;GO:…	K05090	EC:2.7.10.1	COG0515	T	colony stimulating factor 1 receptor [Source:HGNCSymbol;Acc:HGNC:2433]	1436	P07333
ENSG00000137033	12.6454	21.6584	3.63235	0.167711	-2.57595	0.00348828	0.0442369	9	6215786	6257983	+	3253	IL33	GO:0000122;GO:0001819;GO:0005125;GO:0005125;GO:0005125;GO:0005125;GO:0005125;GO:0005515;GO:0005515;GO:0005576;GO:0005576;GO:0005615;GO:0005634;GO:0005634;GO:0005654;GO:0005694;GO:0005720;GO:0005737;GO:0016579;GO:0030133;GO:0031410;GO:0038172;GO:0043032;GO:0045944;GO:0050729;GO:0050729;GO:0090197;GO:0150078;GO:0000122;GO:0001819;GO:0005125;GO:0005125;GO:0005125;GO:0005125;GO:0005125;GO:0005515;GO:…	K12967	-	NOG41297	-	interleukin 33 [Source:HGNC Symbol;Acc:HGNC:16028]"	90865	O95760
ENSG00000283071	8.7619	14.9633	2.56047	0.171117	-2.54695	0.0190336	0.154327	14	103084210	103090027	+	732	LBHD2	-	-	-	-	-	LBH domain containing 2 [Source:HGNCSymbol;Acc:HGNC:52384]	107984640	A0A0U1RRK4
ENSG00000130487	7.03347	12.0027	2.06427	0.171985	-2.53965	0.037948	0.244796	22	50545899	50551023	+	5125	KLHDC7B	GO:0005515;GO:0005515;	-	-	NOG284393	-	kelch domain containing 7B [Source:HGNCSymbol;Acc:HGNC:25145]	113730	Q96G42
ENSG00000198963	26.2533	44.7456	7.7609	0.173445	-2.52745	2.4993e-05	0.000738961	9	74497335	74693177	+	9621	RORB	GO:0000790;GO:0000978;GO:0000981;GO:0001228;GO:0003677;GO:0003677;GO:0003677;GO:0003700;GO:0003700;GO:0003700;GO:0003700;GO:0003707;GO:0003707;GO:0004879;GO:0004879;GO:0004879;GO:0005515;GO:0005634;GO:0005634;GO:0005634;GO:0005634;GO:0005654;GO:0005654;GO:0006355;GO:0006355;GO:0006355;GO:0006367;GO:0007186;GO:0007275;GO:0007601;GO:0008134;GO:0008270;GO:0008270;GO:0008502;GO:0030522;GO:0035881;GO:…	K08533	-	NOG324222	-	RAR related orphan receptor B [Source:HGNCSymbol;Acc:HGNC:10259]	6096	-
ENSG00000163219	10.5998	18.0634	3.13615	0.173619	-2.52601	0.0314474	0.215649	2	68679601	68826833	+	5476	ARHGAP25	GO:0005096;GO:0007165;GO:0043547;GO:0001891;GO:0005096;GO:0005829;GO:0006911;GO:0007015;GO:0007165;GO:0007165;GO:0043547;GO:0051056;GO:0051058;GO:0001891;GO:0005096;GO:0005829;GO:0006911;GO:0007015;GO:0007165;GO:0007165;GO:0043547;GO:0051056;GO:0051058;GO:0001891;GO:0005096;GO:0005829;GO:0006911;GO:0007015;GO:0007165;GO:0007165;GO:0043547;GO:0051056;GO:0051058;GO:0001891;GO:0005096;GO:0005829;GO:…	K20642	-	NOG246008	-	Rho GTPase activating protein 25 [Source:HGNCSymbol;Acc:HGNC:28951]	9938	P42331
ENSG00000151067	8.0357	13.4314	2.63995	0.19655	-2.34703	0.0336387	0.226742	12	1970786	2697950	+	19681	CACNA1C	GO:0005245;GO:0005245;GO:0005891;GO:0005891;GO:0070588;GO:0070588;GO:0005216;GO:0005216;GO:0005244;GO:0005245;GO:0005245;GO:0005262;GO:0005891;GO:0005891;GO:0006811;GO:0006811;GO:0006816;GO:0016020;GO:0016020;GO:0016020;GO:0016021;GO:0034765;GO:0055085;GO:0055085;GO:0070588;GO:0070588;GO:0070588;GO:0002520;GO:0005216;GO:0005216;GO:0005244;GO:0005245;GO:0005245;GO:0005245;GO:0005245;GO:0005262;GO:…	K04850	-	COG1226	P	calcium voltage-gated channel subunit alpha1 C[Source:HGNC Symbol;Acc:HGNC:1390]	775	Q13936;Q5V9X9;Q59GU3
ENSG00000234465	18.7361	31.2317	6.24051	0.199813	-2.32328	0.000913004	0.0152601	19	43575801	43583964	+	4569	PINLYP	GO:0004859;GO:0004859;GO:0005576;GO:0005576;GO:0005576;GO:0043086;GO:0004859;GO:0004859;GO:0005576;GO:0005576;GO:0005576;GO:0043086;GO:0004859;GO:0005576;GO:0005576;GO:0043086;GO:0004859;GO:0005576;GO:0005576;GO:0043086;GO:0004859;GO:0005576;GO:0005576;GO:0043086;	-	-	NOG42561	-	phospholipase A2 inhibitor and LY6/PLAUR domaincontaining [Source:HGNC Symbol;Acc:HGNC:44206]	390940	A6NC86
ENSG00000198576	88.8582	148.082	29.6345	0.200122	-2.32105	0.00586809	0.0659516	8	142611049	142614479	-	2993	ARC	GO:0001669;GO:0003723;GO:0003729;GO:0003729;GO:0005737;GO:0005737;GO:0005768;GO:0005856;GO:0005886;GO:0005886;GO:0005938;GO:0006897;GO:0007010;GO:0007010;GO:0007275;GO:0007492;GO:0007612;GO:0007616;GO:0007616;GO:0007616;GO:0007616;GO:0009952;GO:0014069;GO:0015629;GO:0015629;GO:0016020;GO:0016477;GO:0022604;GO:0030054;GO:0030425;GO:0031410;GO:0031901;GO:0042995;GO:0043025;GO:0043197;GO:0043197;GO:…	K15867	-	NOG81608	K	activity regulated cytoskeleton associated protein[Source:HGNC Symbol;Acc:HGNC:648]	23237	Q7LC44
ENSG00000161270	15.3871	25.5578	5.21632	0.204099	-2.29266	0.00314442	0.0408043	19	35825964	35869287	-	5459	NPHS1	GO:0000165;GO:0005515;GO:0005515;GO:0005515;GO:0005886;GO:0005886;GO:0005886;GO:0005887;GO:0005925;GO:0007155;GO:0007155;GO:0007155;GO:0007254;GO:0007275;GO:0007517;GO:0007519;GO:0007520;GO:0007588;GO:0016020;GO:0016021;GO:0017022;GO:0030838;GO:0032836;GO:0035418;GO:0036057;GO:0042995;GO:0044062;GO:0070062;GO:0072015;GO:0005515;GO:0005515;GO:0005515;GO:0005886;GO:0005886;GO:0005887;GO:0007155;GO:…	-	-	NOG251936	-	NPHS1 adhesion molecule, nephrin [Source:HGNCSymbol;Acc:HGNC:7908]	4868	O60500
ENSG00000155749	10.4737	17.3309	3.61645	0.208671	-2.2607	0.0183183	0.149486	2	201288271	201357398	-	2635	FLACC1	GO:0001520;GO:0003674;GO:0005515;GO:0005575;GO:0005737;GO:0005929;GO:0031514;GO:0035686;GO:0036126;GO:0042995;GO:0001520;GO:0003674;GO:0005515;GO:0005575;GO:0005737;GO:0005929;GO:0031514;GO:0035686;GO:0036126;GO:0042995;GO:0001520;GO:0003674;GO:0005515;GO:0005575;GO:0005737;GO:0005929;GO:0031514;GO:0035686;GO:0036126;GO:0042995;GO:0001520;GO:0003674;GO:0005515;GO:0005575;GO:0005737;GO:0005929;GO:…	-	-	NOG77469	-	flagellum associated containing coiled-coil domains1 [Source:HGNC Symbol;Acc:HGNC:14439]	130540	Q96Q35
ENSG00000153714	91.9068	151.46	32.3539	0.213614	-2.22692	2.24677e-12	2.52333e-10	9	12775020	12823060	+	3062	LURAP1L	GO:0043123;GO:0043123;	-	-	NOG46872	S	leucine rich adaptor protein 1 like [Source:HGNCSymbol;Acc:HGNC:31452]	286343	Q8IV03
ENSG00000144837	10.2628	16.8615	3.66414	0.217308	-2.20218	0.0217151	0.169582	3	119597875	119629811	+	2169	PLA1A	GO:0004620;GO:0005576;GO:0005576;GO:0005615;GO:0006629;GO:0006629;GO:0006629;GO:0006658;GO:0008970;GO:0016042;GO:0016042;GO:0016298;GO:0016787;GO:0036150;GO:0052689;GO:0052689;GO:0052739;GO:0002080;GO:0004620;GO:0005576;GO:0005576;GO:0005615;GO:0006629;GO:0006629;GO:0006629;GO:0006629;GO:0006658;GO:0008970;GO:0008970;GO:0016042;GO:0016042;GO:0016298;GO:0016787;GO:0036150;GO:0052689;GO:0052689;GO:…	K13618	EC:3.1.1.-	NOG39669	S	phospholipase A1 member A [Source:HGNCSymbol;Acc:HGNC:17661]	51365	Q53H76
ENSG00000183668	13.8679	22.5353	5.20042	0.230768	-2.11549	0.00894112	0.0899354	19	43211791	43269530	-	5048	PSG9	GO:0005576;GO:0007565;GO:0007565;GO:0005576;GO:0007565;GO:0007565;	K06500	-	KOG4475	T	pregnancy specific beta-1-glycoprotein 9[Source:HGNC Symbol;Acc:HGNC:9526]	5678	Q00887;Q05DN5
ENSG00000237330	167.28	271.11	63.4486	0.234032	-2.09522	1.94128e-06	7.57635e-05	1	1070967	1074306	-	1900	RNF223	GO:0016020;GO:0016021;GO:0046872;	-	-	NOG257206	-	ring finger protein 223 [Source:HGNCSymbol;Acc:HGNC:40020]	401934	E7ERA6
ENSG00000197279	113.226	183.218	43.235	0.235976	-2.08329	3.08971e-13	3.82805e-11	6	28080568	28089563	+	2514	ZNF165	GO:0003676;GO:0003676;GO:0003677;GO:0003700;GO:0003700;GO:0005515;GO:0005634;GO:0006355;GO:0006355;GO:0042552;GO:0045892;GO:0046872;	K09230	-	COG5048	R	zinc finger protein 165 [Source:HGNCSymbol;Acc:HGNC:12953]	7718	P49910;Q53Z40
ENSG00000158258	13.4159	21.679	5.15274	0.237683	-2.07289	0.0123949	0.113822	3	139935185	140577397	+	14596	CLSTN2	GO:0000139;GO:0005509;GO:0005509;GO:0005783;GO:0005789;GO:0005794;GO:0005886;GO:0007155;GO:0007156;GO:0007156;GO:0009986;GO:0009986;GO:0014069;GO:0016020;GO:0016020;GO:0016020;GO:0016021;GO:0030054;GO:0030425;GO:0042995;GO:0045202;GO:0045211;GO:0045211;GO:0050806;GO:0050806;GO:0051965;GO:0051965;GO:0098794;GO:0098978;GO:0099061;	K22660	-	NOG246161	-	calsyntenin 2 [Source:HGNC Symbol;Acc:HGNC:17448]"	64084	Q9H4D0
ENSG00000101198	56.1041	90.43	21.7782	0.240829	-2.05392	2.43101e-07	1.14654e-05	20	63240784	63272694	-	2591	NKAIN4	GO:0016020;GO:0016021;GO:0002028;GO:0005886;GO:0016020;GO:0016020;GO:0016021;GO:0016020;GO:0016021;	K22735	-	NOG295349	-	sodium/potassium transporting ATPase interacting 4[Source:HGNC Symbol;Acc:HGNC:16191]	128414	Q8IVV8;B3KWY5
ENSG00000138892	15.6232	25.006	6.24051	0.249561	-2.00254	0.00803734	0.0827099	22	50015123	50056935	-	2707	TTLL8	GO:0000166;GO:0005524;GO:0005737;GO:0005829;GO:0005856;GO:0005874;GO:0005929;GO:0005930;GO:0006464;GO:0006464;GO:0015630;GO:0016874;GO:0018094;GO:0018094;GO:0042995;GO:0070735;GO:0070736;GO:0005929;GO:0005930;GO:0006464;GO:0006464;GO:0015630;GO:0018094;GO:0060271;GO:0070735;GO:0070736;	K16608	EC:6.3.2.-	NOG235439	-	tubulin tyrosine ligase like 8 [Source:HGNCSymbol;Acc:HGNC:34000]	164714	-
ENSG00000204869	28.3731	45.4006	11.3456	0.249899	-2.00058	0.0309461	0.213383	19	46039748	46077118	-	3725	IGFL4	GO:0005102;GO:0005576;GO:0005615;	-	-	NOG312142	-	IGF like family member 4 [Source:HGNCSymbol;Acc:HGNC:32931]	444882	Q6B9Z1
ENSG00000169885	10.1985	16.2684	4.12855	0.253778	-1.97836	0.0378996	0.244585	1	1915108	1917296	+	2040	CALML6	GO:0005509;GO:0005509;GO:0000226;GO:0005509;GO:0005509;GO:0005509;GO:0005634;GO:0005737;GO:0019722;GO:0030234;GO:0046872;GO:0050790;	K02183	-	COG5126	DTZ	calmodulin like 6 [Source:HGNCSymbol;Acc:HGNC:24193]	163688	Q8TD86
ENSG00000130766	487.414	775.966	198.863	0.256278	-1.96422	4.99212e-25	2.78329e-22	1	28259518	28282491	+	3462	SESN2	GO:0001932;GO:0001932;GO:0005092;GO:0005515;GO:0005515;GO:0005634;GO:0005634;GO:0005737;GO:0005737;GO:0005739;GO:0005829;GO:0006111;GO:0006635;GO:0007005;GO:0009749;GO:0016239;GO:0016239;GO:0016491;GO:0016684;GO:0016684;GO:0030308;GO:0030308;GO:0030330;GO:0030330;GO:0031588;GO:0031588;GO:0031932;GO:0031932;GO:0031932;GO:0032042;GO:0032542;GO:0032868;GO:0034198;GO:0034599;GO:0034599;GO:0036091;GO:…	K20394	-	NOG312456	-	sestrin 2 [Source:HGNC Symbol;Acc:HGNC:20746]"	83667	P58004
ENSG00000187688	30.1578	47.8664	12.4492	0.260083	-1.94296	0.000276823	0.00562694	17	16415571	16437003	+	3381	TRPV2	GO:0005216;GO:0005216;GO:0005216;GO:0005216;GO:0005261;GO:0005261;GO:0005262;GO:0005262;GO:0005262;GO:0005515;GO:0005737;GO:0005886;GO:0005886;GO:0005886;GO:0005886;GO:0005886;GO:0005886;GO:0005887;GO:0005887;GO:0006811;GO:0006811;GO:0006811;GO:0006816;GO:0007600;GO:0009266;GO:0009408;GO:0009408;GO:0009986;GO:0015075;GO:0016020;GO:0016020;GO:0016020;GO:0016021;GO:0016021;GO:0016021;GO:0030424;GO:…	K04971	-	NOG281194	-	transient receptor potential cation channelsubfamily V member 2 [Source:HGNC Symbol;Acc:HGNC:18082]	51393	Q9Y5S1
ENSG00000176046	1324.28	2097.55	550.998	0.262686	-1.92859	2.75918e-54	1.43578e-50	16	28532708	28539008	-	5508	NUPR1	GO:0003677;GO:0003677;GO:0003713;GO:0005515;GO:0005515;GO:0005634;GO:0005634;GO:0005654;GO:0005737;GO:0008285;GO:0010506;GO:0010507;GO:0010667;GO:0010698;GO:0032993;GO:0043066;GO:0043085;GO:0043433;GO:0043525;GO:0045786;GO:0045786;GO:0045787;GO:0045820;GO:0048471;GO:0050680;GO:0062099;GO:0150078;GO:1901800;GO:1902902;GO:1903508;GO:1903862;GO:1904036;GO:1904691;GO:1905897;GO:2001244;GO:0002526;GO:…	K15626	-	NOG314223	-	nuclear protein 1, transcriptional regulator[Source:HGNC Symbol;Acc:HGNC:29990]	26471	O60356;A0A024QZC4
ENSG00000101255	2495.49	3944.37	1046.62	0.265346	-1.91405	1.07205e-38	2.39082e-35	20	362835	397559	+	3030	TRIB3	GO:0003714;GO:0003714;GO:1903507;GO:0000122;GO:0003714;GO:0003714;GO:0003714;GO:0004672;GO:0004860;GO:0005515;GO:0005515;GO:0005524;GO:0005524;GO:0005634;GO:0005634;GO:0005654;GO:0005829;GO:0005886;GO:0006468;GO:0006468;GO:0006469;GO:0006915;GO:0010506;GO:0010827;GO:0019216;GO:0019901;GO:0019901;GO:0031434;GO:0031625;GO:0032092;GO:0032436;GO:0032869;GO:0034976;GO:0043405;GO:0043405;GO:0045599;GO:…	K19518	-	COG0515	T	tribbles pseudokinase 3 [Source:HGNCSymbol;Acc:HGNC:16228]	57761	Q96RU7
ENSG00000180730	67.0945	105.595	28.5944	0.270794	-1.88473	1.68988e-07	8.24395e-06	13	26044597	26052016	-	3845	SHISA2	GO:0005783;GO:0005783;GO:0005783;GO:0005789;GO:0007275;GO:0016020;GO:0016021;GO:0030178;GO:0030178;GO:0040037;GO:0040037;	-	-	NOG28664	-	shisa family member 2 [Source:HGNCSymbol;Acc:HGNC:20366]	387914	Q6UWI4
ENSG00000153233	28.9422	45.4988	12.3856	0.272219	-1.87716	0.000579605	0.0103055	12	70638073	70920738	-	5037	PTPRR	GO:0001701;GO:0004721;GO:0004725;GO:0004725;GO:0004725;GO:0004725;GO:0005001;GO:0005515;GO:0005615;GO:0005737;GO:0005829;GO:0005886;GO:0005886;GO:0006470;GO:0006470;GO:0006470;GO:0010633;GO:0016020;GO:0016021;GO:0016311;GO:0016311;GO:0016787;GO:0016791;GO:0016791;GO:0019901;GO:0030054;GO:0035335;GO:0038128;GO:0048471;GO:0070373;GO:0001701;GO:0004721;GO:0004725;GO:0004725;GO:0004725;GO:0004725;GO:…	K04458	EC:3.1.3.48	COG5599	T	protein tyrosine phosphatase receptor type R[Source:HGNC Symbol;Acc:HGNC:9680]	5801	Q15256
ENSG00000051108	3250.17	5095.38	1404.97	0.275734	-1.85865	4.60861e-29	3.59725e-26	16	56932142	56944864	+	5062	HERPUD1	GO:0003674;GO:0005515;GO:0005515;GO:0005623;GO:0005783;GO:0005783;GO:0005783;GO:0005783;GO:0005789;GO:0005789;GO:0005789;GO:0005789;GO:0006511;GO:0006511;GO:0006874;GO:0006986;GO:0016020;GO:0016021;GO:0016021;GO:0016567;GO:0030968;GO:0030968;GO:0030968;GO:0030970;GO:0031396;GO:0032469;GO:0032469;GO:0032469;GO:0034976;GO:0034976;GO:0034976;GO:0036499;GO:0043154;GO:0044325;GO:0044325;GO:0044325;GO:…	K14027	-	NOG259558	-	homocysteine inducible ER protein with ubiquitinlike domain 1 [Source:HGNC Symbol;Acc:HGNC:13744]	9709	Q15011;Q53FP9
ENSG00000162772	1039.96	1629.07	450.847	0.276751	-1.85334	9.45967e-17	1.65927e-14	1	212565334	212620777	+	4040	ATF3	GO:0003677;GO:0003677;GO:0003677;GO:0003700;GO:0003700;GO:0005634;GO:0005634;GO:0005654;GO:0005730;GO:0006355;GO:0006355;GO:0006357;GO:0006357;GO:0000122;GO:0000790;GO:0000976;GO:0000977;GO:0000978;GO:0000981;GO:0000981;GO:0001228;GO:0003677;GO:0003677;GO:0003677;GO:0003700;GO:0003700;GO:0003700;GO:0003700;GO:0003714;GO:0005515;GO:0005634;GO:0005634;GO:0005634;GO:0005634;GO:0005634;GO:0005654;GO:…	K09032	-	NOG242494	-	activating transcription factor 3 [Source:HGNCSymbol;Acc:HGNC:785]	467	P18847
ENSG00000088726	10.7852	16.8821	4.68833	0.27771	-1.84835	0.0441097	0.271101	3	12733528	12769457	-	3297	TMEM40	GO:0016020;GO:0016021;GO:0016020;GO:0016021;GO:0016020;GO:0016021;GO:0016020;GO:0016021;GO:0016020;GO:0016021;	-	-	NOG46729	-	transmembrane protein 40 [Source:HGNCSymbol;Acc:HGNC:25620]	55287	Q8WWA1
ENSG00000081041	62.6423	97.8734	27.4112	0.280068	-1.83615	0.000542624	0.00980428	4	74097040	74099196	-	1398	CXCL2	GO:0002237;GO:0005125;GO:0005515;GO:0005576;GO:0005576;GO:0005576;GO:0005576;GO:0005615;GO:0005615;GO:0005615;GO:0006935;GO:0006935;GO:0006935;GO:0006935;GO:0006952;GO:0006952;GO:0006954;GO:0006954;GO:0006954;GO:0006955;GO:0006955;GO:0006955;GO:0007165;GO:0007186;GO:0008009;GO:0008009;GO:0008009;GO:0008009;GO:0019221;GO:0030593;GO:0030595;GO:0045236;GO:0060326;GO:0061844;GO:0070098;GO:0071222;	K05505	-	NOG83801	S	C-X-C motif chemokine ligand 2 [Source:HGNCSymbol;Acc:HGNC:4603]	2920	P19875;A0A024RDD9
ENSG00000274276	12.9266	20.1884	5.66483	0.280598	-1.83342	0.0279987	0.199766	21	6444869	6468040	-	4004	CBSL	GO:0004122;GO:0004122;GO:0004122;GO:0004124;GO:0005634;GO:0005737;GO:0005737;GO:0005737;GO:0005737;GO:0006535;GO:0006535;GO:0006535;GO:0008652;GO:0016829;GO:0019343;GO:0019343;GO:0019344;GO:0019346;GO:0020037;GO:0030170;GO:0046872;GO:0050667;GO:0070814;GO:0004122;GO:0004122;GO:0004122;GO:0004124;GO:0005634;GO:0005737;GO:0005737;GO:0005737;GO:0005737;GO:0006535;GO:0006535;GO:0006535;GO:0008652;GO:…	K01697	EC:4.2.1.22	-	-	cystathionine beta-synthase like [Source:HGNCSymbol;Acc:HGNC:51829]	102724560	P0DN79;P35520
ENSG00000250644	10.7313	16.7584	4.70422	0.280709	-1.83285	0.0445243	0.272241	11	1734821	1763954	-	4807	AC068580.4	GO:0004190;GO:0004190;GO:0004190;GO:0006508;GO:0006508;GO:0006508;GO:0008233;GO:0016020;GO:0016021;GO:0016021;GO:0016021;GO:0016787;GO:0016020;GO:0016021;GO:0016021;GO:0016021;GO:0004190;GO:0004190;GO:0004190;GO:0004190;GO:0005764;GO:0006508;GO:0006508;GO:0006508;GO:0006508;GO:0008233;GO:0016020;GO:0016021;GO:0016021;GO:0016021;GO:0016787;GO:0030163;GO:0004190;GO:0004190;GO:0004190;GO:0006508;GO:…	-	-	-	-	novel protein"	-	-
ENSG00000243137	207.959	323.319	92.5993	0.286402	-1.80388	1.59131e-16	2.72988e-14	19	43192702	43207299	-	6274	PSG4	GO:0005576;GO:0007565;GO:0007565;GO:0005576;GO:0007565;GO:0007565;GO:0005576;GO:0007565;GO:0007565;	K06500	-	NOG145000	S	pregnancy specific beta-1-glycoprotein 4[Source:HGNC Symbol;Acc:HGNC:9521]	5672	Q00888;Q96QL5
ENSG00000111981	117.897	182.877	52.9172	0.289359	-1.78907	1.05821e-10	9.1776e-09	6	149963943	149973715	+	3211	ULBP1	GO:0002376;GO:0005515;GO:0005615;GO:0005783;GO:0005829;GO:0005886;GO:0005886;GO:0005886;GO:0009897;GO:0016020;GO:0016032;GO:0030101;GO:0031225;GO:0042267;GO:0046658;GO:0046703;GO:0050776;	K07986	-	NOG150887	S	UL16 binding protein 1 [Source:HGNCSymbol;Acc:HGNC:14893]	80329	Q9BZM6
ENSG00000148841	3095.62	4798.26	1392.99	0.290311	-1.78433	2.17844e-20	5.96624e-18	10	104309698	104338465	-	7296	ITPRIP	GO:0004860;GO:0004860;GO:0005515;GO:0005634;GO:0005640;GO:0005640;GO:0005886;GO:0006469;GO:0016020;GO:0016021;GO:1902042;GO:0004860;GO:0005515;GO:0005634;GO:0005640;GO:0005886;GO:0006469;GO:0016020;GO:0016021;GO:0004860;GO:0005515;GO:0005634;GO:0005640;GO:0005886;GO:0006469;GO:0016020;GO:0016021;GO:0004860;GO:0005515;GO:0005634;GO:0005640;GO:0005886;GO:0006469;GO:0016020;GO:0016021;	-	-	NOG27279	R	inositol 1,4,5-trisphosphate receptor interactingprotein [Source:HGNC Symbol;Acc:HGNC:29370]	85450	Q8IWB1
ENSG00000122547	493.461	764.757	222.165	0.290504	-1.78337	3.22061e-29	2.79316e-26	7	36153254	36301538	+	4737	EEPD1	GO:0003677;GO:0003677;GO:0006281;GO:0006281;GO:0010875;GO:0010875;GO:0046658;GO:0003677;GO:0003677;GO:0006281;GO:0006281;GO:0010875;GO:0046658;	-	-	COG1555	L	endonuclease/exonuclease/phosphatase family domaincontaining 1 [Source:HGNC Symbol;Acc:HGNC:22223]	80820	Q7L9B9
ENSG00000114796	441.434	684.033	198.835	0.29068	-1.7825	4.4567e-17	8.08994e-15	3	183635610	183684519	+	8650	KLHL24	GO:0005515;GO:2000312;GO:2000312;GO:2000312;GO:2000312;GO:0005515;GO:2000312;GO:2000312;GO:0005515;GO:0005515;GO:0005737;GO:0005912;GO:0016567;GO:0030054;GO:0030057;GO:0030424;GO:0031463;GO:0042995;GO:0043204;GO:0045109;GO:0051865;GO:2000312;GO:2000312;GO:2000312;GO:2000312;GO:2000312;GO:2000312;GO:0005515;GO:2000312;GO:2000312;GO:0005515;GO:2000312;GO:2000312;GO:0005515;GO:0005515;GO:0005737;GO:…	K10461	-	NOG265569	-	kelch like family member 24 [Source:HGNCSymbol;Acc:HGNC:25947]	54800	Q6TFL4
ENSG00000124762	2127.05	3291.6	962.488	0.292407	-1.77395	4.74834e-08	2.6402e-06	6	36676460	36687337	+	2996	CDKN1A	GO:0000079;GO:0000082;GO:0000082;GO:0000086;GO:0000307;GO:0004860;GO:0004860;GO:0004861;GO:0004861;GO:0004861;GO:0004861;GO:0005515;GO:0005515;GO:0005634;GO:0005634;GO:0005634;GO:0005634;GO:0005654;GO:0005654;GO:0005654;GO:0005730;GO:0005737;GO:0005829;GO:0006357;GO:0006367;GO:0006974;GO:0006977;GO:0006977;GO:0007049;GO:0007050;GO:0007050;GO:0007050;GO:0007050;GO:0007095;GO:0007265;GO:0007346;GO:…	K06625	-	NOG290902	-	cyclin dependent kinase inhibitor 1A [Source:HGNCSymbol;Acc:HGNC:1784]	1026	P38936;A0A024RCX5
ENSG00000145107	35.3945	54.6439	16.1452	0.295461	-1.75896	0.000304567	0.00606454	3	196319342	196338503	-	1899	TM4SF19	GO:0016020;GO:0016021;GO:0016021;GO:0016021;GO:0016020;GO:0016021;GO:0016021;GO:0016021;GO:0016021;GO:0016020;GO:0016021;GO:0016021;GO:0016021;GO:0016021;	-	-	NOG28357	S	transmembrane 4 L six family member 19 [Source:HGNCSymbol;Acc:HGNC:25167]	116211	Q96DZ7
ENSG00000143365	306.838	473.597	140.078	0.295774	-1.75743	4.24284e-16	6.55791e-14	1	151806071	151831845	-	6517	RORC	GO:0000122;GO:0000790;GO:0000978;GO:0000981;GO:0001223;GO:0001227;GO:0003677;GO:0003677;GO:0003677;GO:0003700;GO:0003700;GO:0003700;GO:0003707;GO:0003707;GO:0004879;GO:0004879;GO:0004879;GO:0005515;GO:0005515;GO:0005634;GO:0005634;GO:0005634;GO:0005654;GO:0006355;GO:0006355;GO:0006367;GO:0006805;GO:0007275;GO:0008142;GO:0008142;GO:0008270;GO:0008270;GO:0010906;GO:0016604;GO:0019218;GO:0019221;GO:…	K08534	-	NOG317095	-	RAR related orphan receptor C [Source:HGNCSymbol;Acc:HGNC:10260]	6097	P51449;Q6I9R9
ENSG00000128590	521.931	804.334	239.528	0.297797	-1.7476	3.93296e-29	3.23144e-26	7	108569867	108574850	+	2538	DNAJB9	GO:0002377;GO:0002377;GO:0005515;GO:0005730;GO:0005730;GO:0005737;GO:0005737;GO:0005783;GO:0005783;GO:0005783;GO:0005788;GO:0005788;GO:0005789;GO:0006986;GO:0030183;GO:0030183;GO:0030433;GO:0030433;GO:0030544;GO:0034976;GO:0034976;GO:0036498;GO:0051087;GO:0051087;GO:0051787;GO:0070062;GO:1903895;	K09515	-	COG0484	O	DnaJ heat shock protein family (Hsp40) member B9[Source:HGNC Symbol;Acc:HGNC:6968]	4189	Q9UBS3;Q6FIF1
ENSG00000189410	214.305	329.386	99.2248	0.301242	-1.73101	6.11288e-08	3.30201e-06	1	20719731	20732837	-	4487	SH2D5	GO:0005515;GO:0014069;GO:0014069;GO:0030054;GO:0045202;GO:0014069;GO:0030054;GO:0045202;GO:0005515;GO:0005515;	-	-	NOG42660	G	SH2 domain containing 5 [Source:HGNCSymbol;Acc:HGNC:28819]	400745	Q6ZV89
ENSG00000156510	961.629	1475.99	447.265	0.303026	-1.72249	3.68975e-39	9.60013e-36	10	69220332	69267552	+	4223	HKDC1	GO:0000166;GO:0001678;GO:0001678;GO:0001678;GO:0001678;GO:0001678;GO:0004340;GO:0004340;GO:0004396;GO:0004396;GO:0004396;GO:0005524;GO:0005524;GO:0005524;GO:0005536;GO:0005536;GO:0005623;GO:0005739;GO:0005739;GO:0005829;GO:0005975;GO:0005975;GO:0006096;GO:0006096;GO:0006096;GO:0006096;GO:0008865;GO:0016020;GO:0016301;GO:0016310;GO:0016740;GO:0016773;GO:0016773;GO:0019158;GO:0019318;GO:0031966;GO:…	K00844	EC:2.7.1.1	COG5026	G	hexokinase domain containing 1 [Source:HGNCSymbol;Acc:HGNC:23302]	80201	Q2TB90;B3KT70
ENSG00000175003	21.2516	32.5986	9.90465	0.303837	-1.71863	0.0063618	0.0695964	6	160121815	160158718	+	2286	SLC22A1	GO:0005277;GO:0005330;GO:0005334;GO:0005515;GO:0005886;GO:0005886;GO:0005887;GO:0005887;GO:0006811;GO:0006812;GO:0006836;GO:0006855;GO:0008504;GO:0008513;GO:0010248;GO:0015101;GO:0015101;GO:0015101;GO:0015101;GO:0015651;GO:0015695;GO:0015695;GO:0015695;GO:0015697;GO:0015844;GO:0015872;GO:0015874;GO:0016020;GO:0016021;GO:0016021;GO:0016021;GO:0016323;GO:0016323;GO:0022857;GO:0022857;GO:0042802;GO:…	K08198	-	COG0477	G	solute carrier family 22 member 1 [Source:HGNCSymbol;Acc:HGNC:10963]	6580	O15245
ENSG00000148677	19.9331	30.4736	9.39255	0.308219	-1.69797	0.0323926	0.220628	10	90912096	90921276	-	1979	ANKRD1	GO:0000122;GO:0001085;GO:0001650;GO:0002039;GO:0003677;GO:0003713;GO:0003714;GO:0003714;GO:0005515;GO:0005515;GO:0005634;GO:0005634;GO:0005634;GO:0005634;GO:0005634;GO:0005654;GO:0005654;GO:0005667;GO:0005737;GO:0005737;GO:0005737;GO:0005829;GO:0006357;GO:0006357;GO:0008134;GO:0010976;GO:0019216;GO:0030016;GO:0031432;GO:0031432;GO:0031674;GO:0031674;GO:0031674;GO:0032991;GO:0035690;GO:0035914;GO:…	K21433	-	COG0666	R	ankyrin repeat domain 1 [Source:HGNCSymbol;Acc:HGNC:15819]	27063	Q15327;A0A384NYH5
ENSG00000106366	3426.93	5236.08	1617.77	0.308966	-1.69448	9.29663e-27	6.04707e-24	7	101127104	101139247	+	3156	SERPINE1	GO:0001300;GO:0001525;GO:0002020;GO:0002020;GO:0002576;GO:0004867;GO:0004867;GO:0004867;GO:0005102;GO:0005515;GO:0005515;GO:0005576;GO:0005576;GO:0005576;GO:0005615;GO:0005615;GO:0005615;GO:0005615;GO:0005886;GO:0007623;GO:0010466;GO:0010469;GO:0010757;GO:0010951;GO:0010951;GO:0014912;GO:0030194;GO:0030195;GO:0030198;GO:0030336;GO:0030414;GO:0031093;GO:0032757;GO:0033629;GO:0035491;GO:0042730;GO:…	K03982	-	COG4826	O	serpin family E member 1 [Source:HGNCSymbol;Acc:HGNC:8583]	5054	P05121;A0A024QYT5
ENSG00000110046	1425.49	2173.52	677.468	0.311692	-1.68181	1.96193e-19	4.86154e-17	11	64894546	64917211	-	7833	ATG2A	GO:0005654;GO:0005829;GO:0006914;GO:0006914;GO:0043231;GO:0000045;GO:0000045;GO:0000407;GO:0000422;GO:0005515;GO:0005515;GO:0005654;GO:0005811;GO:0005829;GO:0006914;GO:0006914;GO:0006914;GO:0016020;GO:0019898;GO:0034045;GO:0043231;GO:0044804;GO:0000045;GO:0000045;GO:0000407;GO:0000422;GO:0005515;GO:0005515;GO:0005654;GO:0005811;GO:0005829;GO:0006914;GO:0006914;GO:0006914;GO:0016020;GO:0019898;GO:…	K17906	-	NOG304940	-	autophagy related 2A [Source:HGNCSymbol;Acc:HGNC:29028]	23130	Q2TAZ0
ENSG00000168427	91.1245	138.74	43.5087	0.313598	-1.67301	5.98573e-08	3.24456e-06	2	238138668	238152947	+	3780	KLHL30	GO:0005515;	K10466	-	NOG237849	-	kelch like family member 30 [Source:HGNCSymbol;Acc:HGNC:24770]	377007	Q0D2K2
ENSG00000106823	103.274	157.2	49.3484	0.31392	-1.67153	1.06052e-08	6.59591e-07	9	92493554	92536655	-	4916	ECM2	GO:0005178;GO:0005515;GO:0005576;GO:0007160;GO:0008201;GO:0010811;GO:0030198;GO:0031012;GO:0031012;GO:0070052;GO:0005178;GO:0005515;GO:0005518;GO:0005576;GO:0005614;GO:0007160;GO:0008201;GO:0008201;GO:0010811;GO:0010811;GO:0030198;GO:0030198;GO:0031012;GO:0031012;GO:0031012;GO:0070052;GO:0070052;GO:0005515;GO:0005515;	K08119	-	COG4886	S	extracellular matrix protein 2 [Source:HGNCSymbol;Acc:HGNC:3154]	1842	O94769
ENSG00000186642	1652.38	2514.65	790.115	0.314205	-1.67022	1.33062e-45	5.19306e-42	11	72576141	72674591	-	7182	PDE2A	GO:0000122;GO:0000166;GO:0000287;GO:0003170;GO:0003281;GO:0004114;GO:0004114;GO:0004114;GO:0004115;GO:0004115;GO:0004118;GO:0004118;GO:0004118;GO:0005515;GO:0005515;GO:0005634;GO:0005634;GO:0005737;GO:0005739;GO:0005741;GO:0005741;GO:0005743;GO:0005743;GO:0005759;GO:0005759;GO:0005783;GO:0005794;GO:0005829;GO:0005829;GO:0005829;GO:0005886;GO:0005886;GO:0007165;GO:0007165;GO:0007186;GO:0007193;GO:…	K18283	EC:3.1.4.17	NOG270709	-	phosphodiesterase 2A [Source:HGNCSymbol;Acc:HGNC:8777]	5138	O00408;Q8IW54
ENSG00000205336	1308.82	1986.05	631.6	0.318019	-1.65282	4.06877e-21	1.29628e-18	16	57610652	57665580	+	8659	ADGRG1	GO:0001525;GO:0004888;GO:0004888;GO:0004930;GO:0004930;GO:0004930;GO:0004930;GO:0004930;GO:0004930;GO:0005515;GO:0005518;GO:0005576;GO:0005886;GO:0005887;GO:0005887;GO:0007155;GO:0007155;GO:0007155;GO:0007165;GO:0007166;GO:0007166;GO:0007186;GO:0007186;GO:0007186;GO:0007186;GO:0007186;GO:0007189;GO:0007266;GO:0007267;GO:0007275;GO:0007399;GO:0007420;GO:0008201;GO:0008201;GO:0008285;GO:0010573;GO:…	K08450	-	NOG290113	-	adhesion G protein-coupled receptor G1 [Source:HGNCSymbol;Acc:HGNC:4512]	9289	Q9Y653;A0A024R6U7
ENSG00000156804	76.3269	115.802	36.8515	0.318228	-1.65187	8.48043e-07	3.57805e-05	8	123497889	123541206	-	7395	FBXO32	GO:0000209;GO:0005515;GO:0005515;GO:0005634;GO:0005634;GO:0005654;GO:0005737;GO:0005829;GO:0005829;GO:0014894;GO:0014894;GO:0016567;GO:0019005;GO:0030018;GO:0043687;GO:0071549;GO:0000209;GO:0005515;GO:0005515;GO:0005634;GO:0005654;GO:0005737;GO:0005829;GO:0005829;GO:0014894;GO:0016567;GO:0019005;GO:0043687;	K10305	-	NOG327896	-	F-box protein 32 [Source:HGNCSymbol;Acc:HGNC:16731]	114907	Q969P5;A0A024R9F3
ENSG00000092068	56.7052	86.0151	27.3954	0.318495	-1.65066	0.000351304	0.00682116	14	23125295	23183674	-	5991	SLC7A8	GO:0016020;GO:0016020;GO:0016021;GO:0022857;GO:0055085;GO:0003333;GO:0005515;GO:0005737;GO:0005886;GO:0005886;GO:0005887;GO:0006865;GO:0006865;GO:0006865;GO:0006865;GO:0009636;GO:0015101;GO:0015171;GO:0015171;GO:0015175;GO:0015175;GO:0015179;GO:0015179;GO:0015695;GO:0015804;GO:0015804;GO:0015807;GO:0016020;GO:0016020;GO:0016020;GO:0016021;GO:0016021;GO:0016021;GO:0016323;GO:0019534;GO:0022857;GO:…	K13781	-	COG0531	E	solute carrier family 7 member 8 [Source:HGNCSymbol;Acc:HGNC:11066]	23428	Q9UHI5;Q53EM9
ENSG00000135116	47.115	71.4435	22.7865	0.318944	-1.64862	9.47864e-05	0.00226949	12	116856144	116881441	-	6853	HRK	GO:0005515;GO:0005739;GO:0005739;GO:0006915;GO:0016020;GO:0016021;GO:0031334;GO:0042981;GO:0042981;GO:0043065;GO:0043065;GO:0090200;	K02512	-	NOG41778	S	harakiri, BCL2 interacting protein [Source:HGNCSymbol;Acc:HGNC:5185]	8739	O00198
ENSG00000154319	36.05	54.5457	17.5543	0.321827	-1.63564	0.0443792	0.271901	8	11421476	11475908	-	5049	FAM167A	GO:0005515;GO:0005515;GO:0005515;	-	-	NOG25268	-	family with sequence similarity 167 member A[Source:HGNC Symbol;Acc:HGNC:15549]	83648	Q96KS9
ENSG00000272899	39.3453	59.4251	19.2654	0.324196	-1.62506	0.0492253	0.290532	7	128866330	128872047	+	3883	ATP6V1FNB	-	-	-	-	-	ATP6V1F neighbor [Source:HGNCSymbol;Acc:HGNC:52392]	100130705	A0A1B0GUX0
ENSG00000136235	636.804	959.595	314.014	0.327236	-1.6116	2.57175e-28	1.91179e-25	7	23235967	23275108	+	5906	GPNMB	GO:0001649;GO:0001818;GO:0001934;GO:0001934;GO:0005178;GO:0005178;GO:0005515;GO:0005515;GO:0005768;GO:0005886;GO:0005886;GO:0005887;GO:0005887;GO:0007155;GO:0007155;GO:0007165;GO:0007267;GO:0008201;GO:0008201;GO:0008285;GO:0016020;GO:0016021;GO:0016021;GO:0016021;GO:0030282;GO:0030335;GO:0031410;GO:0031901;GO:0031954;GO:0032720;GO:0033162;GO:0034103;GO:0034103;GO:0042056;GO:0042130;GO:0045545;GO:…	K20732	-	NOG40272	O	glycoprotein nmb [Source:HGNC Symbol;Acc:HGNC:4462]"	10457	Q14956
ENSG00000164463	258.292	389.038	127.546	0.327849	-1.6089	3.29281e-16	5.35459e-14	5	173056352	173139284	+	12333	CREBRF	GO:0000977;GO:0000981;GO:0001228;GO:0003700;GO:0005515;GO:0005515;GO:0005634;GO:0005654;GO:0005654;GO:0006355;GO:0006986;GO:0006986;GO:0006986;GO:0030968;GO:0045944;GO:0000977;GO:0000981;GO:0001228;GO:0003700;GO:0003700;GO:0005515;GO:0005515;GO:0005634;GO:0005654;GO:0005654;GO:0006355;GO:0006355;GO:0006986;GO:0006986;GO:0006986;GO:0016604;GO:0030968;GO:0042711;GO:0045944;GO:1900170;GO:1902213;GO:…	K21554	-	NOG85144	O	CREB3 regulatory factor [Source:HGNCSymbol;Acc:HGNC:24050]	153222	Q8IUR6
ENSG00000153294	28.1135	42.3368	13.8901	0.328087	-1.60785	0.0140495	0.124228	6	47685864	47722021	+	3391	ADGRF4	GO:0004888;GO:0004888;GO:0004930;GO:0004930;GO:0007166;GO:0007166;GO:0007186;GO:0007186;GO:0016020;GO:0016020;GO:0016020;GO:0016021;GO:0016021;GO:0016021;GO:0004888;GO:0004888;GO:0004930;GO:0004930;GO:0004930;GO:0004930;GO:0007165;GO:0007166;GO:0007166;GO:0007186;GO:0007186;GO:0007186;GO:0007186;GO:0016020;GO:0016020;GO:0016020;GO:0016021;GO:0016021;GO:0016021;GO:0016021;GO:0004888;GO:0004888;GO:…	K08457	-	NOG313007	-	adhesion G protein-coupled receptor F4 [Source:HGNCSymbol;Acc:HGNC:19011]	221393	Q8IZF3
ENSG00000268964	48.3615	72.7692	23.9537	0.329174	-1.60308	0.000106445	0.00252157	19	53044740	53051680	+	3033	ERVV-2	GO:0000768;GO:0016020;GO:0016021;	-	-	-	-	endogenous retrovirus group V member 2, envelope[Source:HGNC Symbol;Acc:HGNC:39051]	100271846	B6SEH9;M9QSX5
ENSG00000154803	508.911	762.327	255.495	0.335152	-1.57711	4.40642e-24	2.21899e-21	17	17212212	17237188	-	9786	FLCN	GO:0000122;GO:0000122;GO:0000122;GO:0001701;GO:0001701;GO:0001932;GO:0001934;GO:0001934;GO:0005085;GO:0005085;GO:0005096;GO:0005515;GO:0005515;GO:0005515;GO:0005634;GO:0005737;GO:0005764;GO:0005765;GO:0005813;GO:0005829;GO:0005829;GO:0005829;GO:0005886;GO:0005929;GO:0005929;GO:0007043;GO:0007043;GO:0009267;GO:0010508;GO:0010508;GO:0010629;GO:0010629;GO:0010823;GO:0010823;GO:0030097;GO:0030097;GO:…	K09594	-	NOG319853	-	folliculin [Source:HGNC Symbol;Acc:HGNC:27310]"	201163	Q8NFG4
ENSG00000120051	17.2872	25.821	8.7533	0.338999	-1.56065	0.0262843	0.191651	10	104353833	104455102	+	3491	CFAP58	GO:0005515;GO:0005615;GO:0005929;GO:0042995;	-	-	NOG114912	R	cilia and flagella associated protein 58[Source:HGNC Symbol;Acc:HGNC:26676]	159686	Q5T655
ENSG00000143669	498.01	743.279	252.741	0.340035	-1.55625	2.62043e-23	1.23962e-20	1	235661041	235883640	-	19614	LYST	GO:0005515;GO:0005515;GO:0005737;GO:0007040;GO:0007040;GO:0015031;GO:0015630;GO:0030595;GO:0032438;GO:0032510;GO:0033364;GO:0042267;GO:0042742;GO:0042832;GO:0043473;GO:0051607;GO:0007040;GO:0007040;GO:0007040;GO:0007040;	K22937	-	COG2319	R	lysosomal trafficking regulator [Source:HGNCSymbol;Acc:HGNC:1968]	1130	Q99698
ENSG00000116761	725.662	1082.6	368.725	0.340592	-1.55388	3.28849e-16	5.35459e-14	1	70411218	70439851	+	2414	CTH	GO:0000098;GO:0003824;GO:0003824;GO:0004123;GO:0004123;GO:0004123;GO:0005515;GO:0005515;GO:0005516;GO:0005737;GO:0005737;GO:0005829;GO:0006534;GO:0008652;GO:0016829;GO:0016846;GO:0018272;GO:0019343;GO:0019343;GO:0019344;GO:0019346;GO:0019346;GO:0019346;GO:0019346;GO:0019346;GO:0030170;GO:0030170;GO:0030170;GO:0030170;GO:0030968;GO:0042802;GO:0044524;GO:0044540;GO:0051289;GO:0070062;GO:0070814;GO:…	K01758	EC:4.4.1.1	COG0626	E	cystathionine gamma-lyase [Source:HGNCSymbol;Acc:HGNC:2501]	1491	P32929
ENSG00000197355	2640.92	3938.04	1343.8	0.341235	-1.55116	2.09636e-45	6.54525e-42	9	137077517	137084539	+	5267	UAP1L1	GO:0003977;GO:0006048;GO:0016740;GO:0016779;GO:0070569;GO:0070569;GO:0003977;GO:0006048;GO:0016740;GO:0016779;GO:0070569;GO:0070569;	K00972	-	COG4284	G	UDP-N-acetylglucosamine pyrophosphorylase 1 like 1[Source:HGNC Symbol;Acc:HGNC:28082]	91373	Q3KQV9
ENSG00000185565	16.3462	24.3716	8.32068	0.341408	-1.55043	0.0305814	0.211335	3	115802363	117139389	-	10286	LSAMP	GO:0005829;GO:0016020;GO:0016021;GO:0005515;GO:0005576;GO:0005829;GO:0005886;GO:0005886;GO:0007155;GO:0007399;GO:0016020;GO:0031225;GO:0005829;GO:0016020;GO:0016021;	K06772	-	NOG283018	-	limbic system associated membrane protein[Source:HGNC Symbol;Acc:HGNC:6705]	4045	Q13449;B7Z661
ENSG00000133083	339.075	503.845	174.305	0.34595	-1.53137	3.47809e-06	0.000126861	13	35768652	36131306	-	14375	DCLK1	GO:0000166;GO:0004672;GO:0004672;GO:0004672;GO:0004674;GO:0005524;GO:0005524;GO:0005524;GO:0005887;GO:0006468;GO:0006468;GO:0006468;GO:0007275;GO:0007399;GO:0007399;GO:0007417;GO:0009615;GO:0016197;GO:0016301;GO:0016310;GO:0016740;GO:0030154;GO:0035556;GO:0048812;GO:0000166;GO:0001764;GO:0004672;GO:0004672;GO:0004672;GO:0004672;GO:0004674;GO:0005524;GO:0005524;GO:0005524;GO:0005887;GO:0006468;GO:…	K08805	EC:2.7.11.1	COG0515	T	doublecortin like kinase 1 [Source:HGNCSymbol;Acc:HGNC:2700]	9201	O15075
ENSG00000140297	919.271	1365.95	472.592	0.345981	-1.53124	1.79804e-30	1.75433e-27	15	59594875	59640239	+	6476	GCNT3	GO:0016020;GO:0016021;GO:0000139;GO:0000139;GO:0002426;GO:0003829;GO:0003829;GO:0005794;GO:0005975;GO:0006486;GO:0006493;GO:0008109;GO:0008109;GO:0008109;GO:0008375;GO:0008375;GO:0016020;GO:0016020;GO:0016020;GO:0016020;GO:0016021;GO:0016266;GO:0016740;GO:0016757;GO:0047225;GO:0047225;GO:0048729;GO:0050892;GO:0060993;GO:0070062;GO:0000139;GO:0000139;GO:0003829;GO:0003829;GO:0005794;GO:0005975;GO:…	K09662	EC:2.4.1.-	NOG253565	-	glucosaminyl (N-acetyl) transferase 3, mucin type[Source:HGNC Symbol;Acc:HGNC:4205]	9245	O95395;A0A024R5T9
ENSG00000109819	730.287	1084.6	375.97	0.346643	-1.52848	1.02965e-27	7.30627e-25	4	23755041	23904089	-	10870	PPARGC1A	GO:0000302;GO:0000422;GO:0001659;GO:0001666;GO:0001678;GO:0001933;GO:0002021;GO:0002931;GO:0003676;GO:0003676;GO:0003677;GO:0003677;GO:0003682;GO:0003712;GO:0003712;GO:0003712;GO:0003712;GO:0003713;GO:0003713;GO:0003713;GO:0003713;GO:0003723;GO:0005102;GO:0005102;GO:0005515;GO:0005623;GO:0005634;GO:0005634;GO:0005634;GO:0005634;GO:0005654;GO:0005654;GO:0005719;GO:0005737;GO:0005737;GO:0005829;GO:…	K07202	-	NOG78353	S	PPARG coactivator 1 alpha [Source:HGNCSymbol;Acc:HGNC:9237]	10891	Q9UBK2;A0A024R9Q9
ENSG00000181392	15.2291	22.6178	7.84037	0.346646	-1.52846	0.0404937	0.25588	19	36003307	36008813	-	2548	SYNE4	GO:0005515;GO:0005634;GO:0005635;GO:0005640;GO:0016020;GO:0016021;GO:0016021;GO:0016021;GO:0031309;GO:0031309;GO:0031309;GO:0034993;GO:0045198;GO:0045198;GO:0045198;GO:0005635;GO:0005635;GO:0034993;GO:0034993;GO:0005515;GO:0005634;GO:0005635;GO:0005635;GO:0005640;GO:0016020;GO:0016021;GO:0016021;GO:0016021;GO:0031309;GO:0031309;GO:0034993;GO:0034993;GO:0045198;GO:0045198;GO:0005635;GO:0005635;GO:…	K23401	-	NOG39456	T	spectrin repeat containing nuclear envelope familymember 4 [Source:HGNC Symbol;Acc:HGNC:26703]	163183	Q8N205
ENSG00000166793	18.8158	27.8223	9.80928	0.352569	-1.50402	0.0249439	0.185891	11	57645087	57649944	-	4460	YPEL4	GO:0005634;GO:0005730;GO:0046872;GO:0046872;GO:0005634;GO:0005730;GO:0046872;GO:0005634;GO:0005730;GO:0046872;	-	-	NOG300891	-	yippee like 4 [Source:HGNC Symbol;Acc:HGNC:18328]"	219539	Q96NS1;A0A024R4Y8
ENSG00000146733	1355.1	1997.67	712.516	0.356673	-1.48733	1.86655e-34	3.23763e-31	7	56011051	56051604	-	2762	PSPH	GO:0000287;GO:0000287;GO:0004647;GO:0004647;GO:0004647;GO:0005509;GO:0005737;GO:0005829;GO:0006563;GO:0006563;GO:0006564;GO:0006564;GO:0006564;GO:0006564;GO:0008652;GO:0016311;GO:0016311;GO:0016787;GO:0016791;GO:0042802;GO:0042803;GO:0046872;GO:0000287;GO:0000287;GO:0004647;GO:0004647;GO:0004647;GO:0004647;GO:0005509;GO:0005737;GO:0005829;GO:0006563;GO:0006563;GO:0006564;GO:0006564;GO:0006564;GO:…	K01079	EC:3.1.3.3	COG0560	E	phosphoserine phosphatase [Source:HGNCSymbol;Acc:HGNC:9577]	5723	P78330;A0A024RDL3
ENSG00000087074	1037.88	1528.01	547.743	0.358468	-1.48008	3.86162e-07	1.75244e-05	19	48872421	48876058	+	3065	PPP1R15A	GO:0000164;GO:0000164;GO:0005515;GO:0005737;GO:0005737;GO:0005739;GO:0005739;GO:0005741;GO:0005783;GO:0005783;GO:0005783;GO:0005789;GO:0005789;GO:0005794;GO:0005829;GO:0006417;GO:0006915;GO:0006915;GO:0006974;GO:0007050;GO:0008157;GO:0016020;GO:0016020;GO:0019888;GO:0019888;GO:0019901;GO:0032058;GO:0032515;GO:0032516;GO:0032516;GO:0034976;GO:0034976;GO:0035308;GO:0036496;GO:0070059;GO:0070972;GO:…	K14019	-	NOG75356	S	protein phosphatase 1 regulatory subunit 15A[Source:HGNC Symbol;Acc:HGNC:14375]	23645	O75807
ENSG00000166046	107.034	157.567	56.5018	0.35859	-1.47959	2.12182e-07	1.00987e-05	12	106301929	106347003	+	6616	TCP11L2	GO:0005515;GO:0005515;	-	-	NOG257003	-	t-complex 11 like 2 [Source:HGNCSymbol;Acc:HGNC:28627]	255394	Q8N4U5;A0A024RBH4
ENSG00000074660	52.9535	77.793	28.1141	0.361396	-1.46835	0.00019706	0.00420835	17	1633858	1645744	-	4958	SCARF1	GO:0004888;GO:0005044;GO:0005044;GO:0005044;GO:0005886;GO:0006707;GO:0006898;GO:0006898;GO:0006898;GO:0006898;GO:0007155;GO:0010976;GO:0010976;GO:0010976;GO:0016020;GO:0016021;GO:0016021;GO:0016021;GO:0016322;GO:0016322;GO:0016358;GO:0030169;GO:0030169;GO:0030666;GO:0048680;GO:0048680;GO:0004888;GO:0005044;GO:0005044;GO:0005886;GO:0006707;GO:0006898;GO:0006898;GO:0006898;GO:0007155;GO:0010976;GO:…	-	-	NOG284054	-	scavenger receptor class F member 1 [Source:HGNCSymbol;Acc:HGNC:16820]	8578	Q14162;A8K6Z5
ENSG00000095752	174.012	255.307	92.7175	0.363161	-1.46132	0.0351129	0.233453	19	55364382	55370463	-	2678	IL11	GO:0005125;GO:0005125;GO:0005125;GO:0005142;GO:0005142;GO:0005515;GO:0005576;GO:0005576;GO:0005615;GO:0005737;GO:0005737;GO:0007165;GO:0008083;GO:0008083;GO:0008284;GO:0008284;GO:0008284;GO:0019221;GO:0030183;GO:0030219;GO:0033138;GO:0043410;GO:0043410;GO:0045444;GO:0045944;GO:0046888;GO:0050731;GO:0005125;GO:0005125;GO:0005142;GO:0005515;GO:0005576;GO:0005576;GO:0005615;GO:0005737;GO:0008083;GO:…	K05417	-	NOG72895	M	interleukin 11 [Source:HGNC Symbol;Acc:HGNC:5966]"	3589	P20809;A8K3F7
ENSG00000204386	1267.62	1857.67	677.579	0.364747	-1.45503	1.90117e-32	2.28301e-29	6	31857659	31862822	-	4738	NEU1	GO:0004308;GO:0004308;GO:0004308;GO:0004308;GO:0004308;GO:0004308;GO:0005515;GO:0005576;GO:0005737;GO:0005764;GO:0005764;GO:0005764;GO:0005765;GO:0005886;GO:0005975;GO:0006629;GO:0006687;GO:0006689;GO:0008152;GO:0009313;GO:0009313;GO:0016020;GO:0016020;GO:0016021;GO:0016042;GO:0016787;GO:0016798;GO:0016997;GO:0030054;GO:0031410;GO:0035580;GO:0043202;GO:0043202;GO:0043231;GO:0043231;GO:0043312;GO:…	K01186	EC:3.2.1.18	COG4409	G	neuraminidase 1 [Source:HGNC Symbol;Acc:HGNC:7758]"	4758	Q99519;Q5JQI0
ENSG00000175874	99.3467	145.28	53.4134	0.367658	-1.44356	8.20524e-05	0.00202038	2	101345550	101387503	-	7059	CREG2	GO:0005576;GO:0005615;GO:0005783;GO:0005794;GO:0048037;GO:0048037;	-	-	NOG276187	-	cellular repressor of E1A stimulated genes 2[Source:HGNC Symbol;Acc:HGNC:14272]	200407	Q8IUH2
ENSG00000142623	100.901	147.54	54.2627	0.367784	-1.44307	1.83261e-05	0.000567636	1	17205128	17246007	+	4903	PADI1	GO:0004668;GO:0004668;GO:0004668;GO:0004668;GO:0005509;GO:0005509;GO:0005509;GO:0005634;GO:0005654;GO:0005737;GO:0005737;GO:0005737;GO:0005737;GO:0005829;GO:0005829;GO:0006325;GO:0016787;GO:0018101;GO:0018101;GO:0018101;GO:0036414;GO:0046872;	K01481	EC:3.5.3.15	NOG42085	S	peptidyl arginine deiminase 1 [Source:HGNCSymbol;Acc:HGNC:18367]	29943	Q9ULC6
ENSG00000274180	66.8063	97.5945	36.018	0.369058	-1.43808	4.39162e-05	0.00120488	17	21238870	21253410	-	4931	NATD1	GO:0005515;	K06975	-	-	-	N-acetyltransferase domain containing 1 [Source:HGNCSymbol;Acc:HGNC:30770]	256302	Q8N6N6
ENSG00000125740	81.8478	119.548	44.148	0.369292	-1.43717	0.0358105	0.236479	19	45467995	45475179	+	5553	FOSB	GO:0000122;GO:0000790;GO:0000978;GO:0000981;GO:0000981;GO:0003677;GO:0003677;GO:0003677;GO:0003677;GO:0003700;GO:0003700;GO:0005515;GO:0005634;GO:0005634;GO:0005634;GO:0005634;GO:0005634;GO:0005654;GO:0005654;GO:0006355;GO:0006357;GO:0006357;GO:0006357;GO:0008134;GO:0043231;GO:0000122;GO:0000790;GO:0000978;GO:0000981;GO:0000981;GO:0003677;GO:0003677;GO:0003677;GO:0003677;GO:0003700;GO:0003700;GO:…	K09029	-	NOG257871	-	FosB proto-oncogene, AP-1 transcription factorsubunit [Source:HGNC Symbol;Acc:HGNC:3797]	2354	P53539;A0A024R0P6
ENSG00000040608	520.738	760.28	281.195	0.369858	-1.43496	1.04818e-20	3.03021e-18	22	20241415	20283246	-	3126	RTN4R	GO:0005515;GO:0005515;GO:0005515;GO:0005515;GO:0005515;GO:0005783;GO:0005886;GO:0005886;GO:0005886;GO:0005887;GO:0005887;GO:0007166;GO:0007166;GO:0007409;GO:0008201;GO:0008201;GO:0008289;GO:0009986;GO:0009986;GO:0009986;GO:0009986;GO:0010977;GO:0010977;GO:0010977;GO:0016020;GO:0022038;GO:0022038;GO:0023041;GO:0023041;GO:0030424;GO:0030425;GO:0030426;GO:0030517;GO:0030517;GO:0031225;GO:0031362;GO:…	K16659	-	COG4886	S	reticulon 4 receptor [Source:HGNCSymbol;Acc:HGNC:18601]	65078	Q9BZR6
ENSG00000052795	525.468	766.99	283.947	0.370209	-1.43359	2.23251e-14	3.11176e-12	4	158769026	158908050	+	10981	FNIP2	GO:0000122;GO:0001932;GO:0005515;GO:0005515;GO:0005737;GO:0005737;GO:0005829;GO:0006468;GO:0006974;GO:0008630;GO:0008630;GO:0010823;GO:0031334;GO:0033138;GO:0034451;GO:0042030;GO:0043086;GO:0051087;GO:1904262;	K20401	-	NOG330489	-	folliculin interacting protein 2 [Source:HGNCSymbol;Acc:HGNC:29280]	57600	Q9P278
ENSG00000023902	27.6069	40.1088	15.1051	0.376603	-1.40888	0.00915956	0.0916602	1	150149183	150164720	+	6629	PLEKHO1	GO:0005515;GO:0005634;GO:0005737;GO:0005886;GO:0007520;GO:0008360;GO:0016020;GO:0032587;GO:0036195;GO:0051451;GO:0072673;	-	-	NOG47463	-	pleckstrin homology domain containing O1[Source:HGNC Symbol;Acc:HGNC:24310]	51177	Q53GL0
ENSG00000135604	101.53	147.297	55.7638	0.37858	-1.40133	1.26693e-06	5.13715e-05	6	144150517	144191939	+	5504	STX11	GO:0000149;GO:0005484;GO:0005484;GO:0005484;GO:0005484;GO:0005515;GO:0005515;GO:0005794;GO:0005794;GO:0005794;GO:0005886;GO:0006886;GO:0006886;GO:0006886;GO:0006887;GO:0006906;GO:0008021;GO:0012505;GO:0015031;GO:0016020;GO:0016020;GO:0016020;GO:0016021;GO:0016192;GO:0016192;GO:0031201;GO:0031629;GO:0042734;GO:0048278;GO:0048787;GO:0061025;	K08487	-	NOG306476	-	syntaxin 11 [Source:HGNC Symbol;Acc:HGNC:11429]"	8676	O75558
ENSG00000170667	17.8929	25.9447	9.84107	0.379309	-1.39856	0.0414252	0.258986	7	102482445	102517781	-	4840	RASA4B	GO:0007165;GO:0007165;GO:0035556;GO:0035556;GO:0043087;GO:0043087;GO:0005096;GO:0005096;GO:0005096;GO:0005543;GO:0005543;GO:0005737;GO:0005829;GO:0005886;GO:0007165;GO:0007165;GO:0016020;GO:0035556;GO:0035556;GO:0043087;GO:0043087;GO:0043547;GO:0046580;GO:0046580;GO:0046872;GO:0071277;GO:0071277;GO:0005096;GO:0005096;GO:0005096;GO:0005543;GO:0005543;GO:0007165;GO:0007165;GO:0035556;GO:0035556;GO:…	K17630	-	COG5038	R	RAS p21 protein activator 4B [Source:HGNCSymbol;Acc:HGNC:35202]	100271927	F5GXT2
ENSG00000179148	25.394	36.8024	13.9855	0.380016	-1.39587	0.0139174	0.123516	17	8095900	8119047	-	3760	ALOXE3	GO:0005515;GO:0016491;GO:0016702;GO:0016702;GO:0046872;GO:0046872;GO:0046872;GO:0051213;GO:0055114;GO:0055114;GO:0055114;GO:0005506;GO:0005506;GO:0005515;GO:0005515;GO:0005737;GO:0005829;GO:0006629;GO:0006631;GO:0006665;GO:0016491;GO:0016702;GO:0016702;GO:0016829;GO:0016853;GO:0019233;GO:0019369;GO:0019369;GO:0019372;GO:0019372;GO:0019372;GO:0035357;GO:0043651;GO:0043651;GO:0045444;GO:0046513;GO:…	K18684	-	NOG69653	-	arachidonate lipoxygenase 3 [Source:HGNCSymbol;Acc:HGNC:13743]	59344	Q9BYJ1
ENSG00000116852	331.815	480.793	182.836	0.38028	-1.39487	1.54858e-11	1.55967e-09	1	200969390	201023700	-	12150	KIF21B	GO:0000166;GO:0003777;GO:0003777;GO:0003777;GO:0005515;GO:0005524;GO:0005524;GO:0005524;GO:0005737;GO:0005856;GO:0005871;GO:0005874;GO:0005874;GO:0007018;GO:0007018;GO:0007018;GO:0008017;GO:0008017;GO:0008017;GO:0016887;GO:0030424;GO:0030425;GO:0030426;GO:0031410;GO:0042995;GO:0000166;GO:0003777;GO:0003777;GO:0003777;GO:0005515;GO:0005524;GO:0005524;GO:0005524;GO:0005737;GO:0005856;GO:0005871;GO:…	K10395	-	COG2319	R	kinesin family member 21B [Source:HGNCSymbol;Acc:HGNC:29442]	23046	O75037;Q2UVF0
ENSG00000116954	421.523	610.677	232.368	0.380509	-1.394	1.58871e-17	3.13942e-15	1	38838198	38859772	-	5116	RRAGC	GO:0000166;GO:0000287;GO:0003924;GO:0003924;GO:0005515;GO:0005515;GO:0005515;GO:0005525;GO:0005525;GO:0005525;GO:0005525;GO:0005525;GO:0005634;GO:0005634;GO:0005634;GO:0005654;GO:0005737;GO:0005737;GO:0005764;GO:0005764;GO:0005829;GO:0006351;GO:0006915;GO:0007050;GO:0007264;GO:0008380;GO:0009267;GO:0010506;GO:0016241;GO:0019003;GO:0019003;GO:0032006;GO:0032008;GO:0034198;GO:0034448;GO:0034613;GO:…	K16186	-	NOG250062	-	Ras related GTP binding C [Source:HGNCSymbol;Acc:HGNC:19902]	64121	Q9HB90
ENSG00000166750	499.128	722.869	275.388	0.380965	-1.39227	3.83797e-19	9.07796e-17	17	35243071	35273655	+	10674	SLFN5	GO:0005634;GO:0005634;GO:0000166;GO:0005524;GO:0005634;GO:0005634;GO:0005634;GO:0030154;GO:0000166;GO:0005524;GO:0005634;GO:0005634;GO:0030154;	-	-	NOG25289	S	schlafen family member 5 [Source:HGNCSymbol;Acc:HGNC:28286]	162394	Q08AF3
ENSG00000166900	1026.19	1484.04	568.351	0.382976	-1.38467	2.39687e-27	1.62685e-24	11	59713456	59805882	+	7308	STX3	GO:0005484;GO:0005484;GO:0006886;GO:0006886;GO:0006887;GO:0006887;GO:0016020;GO:0016020;GO:0016020;GO:0016021;GO:0016081;GO:0016081;GO:0016192;GO:0016192;GO:0061025;GO:0098793;GO:0000149;GO:0005484;GO:0005484;GO:0005484;GO:0005484;GO:0005515;GO:0005515;GO:0005773;GO:0005886;GO:0005886;GO:0005886;GO:0005886;GO:0005911;GO:0006836;GO:0006886;GO:0006886;GO:0006886;GO:0006887;GO:0006887;GO:0006887;GO:…	K08486	-	COG5074	U	syntaxin 3 [Source:HGNC Symbol;Acc:HGNC:11438]"	6809	Q13277;Q53YE2
ENSG00000130517	721.604	1043.09	400.115	0.383585	-1.38238	3.7666e-23	1.72942e-20	19	18340598	18369950	+	7509	PGPEP1	GO:0005737;GO:0005829;GO:0005829;GO:0005829;GO:0005829;GO:0006508;GO:0006508;GO:0006508;GO:0006508;GO:0006508;GO:0008233;GO:0008233;GO:0008233;GO:0008234;GO:0016787;GO:0016920;GO:0016920;GO:0005829;GO:0005829;GO:0006508;GO:0006508;GO:0008233;GO:0008233;GO:0016920;GO:0016920;GO:0005829;GO:0005829;GO:0006508;GO:0006508;GO:0008233;GO:0008233;GO:0016920;GO:0016920;GO:0005737;GO:0005829;GO:0005829;GO:…	K01304	EC:3.4.19.3	COG2039	O	pyroglutamyl-peptidase I [Source:HGNCSymbol;Acc:HGNC:13568]	54858	Q9NXJ5
ENSG00000126218	31.8669	45.9888	17.745	0.385855	-1.37387	0.00626668	0.0688817	13	113122799	113149529	+	2371	F10	GO:0004252;GO:0004252;GO:0004252;GO:0004252;GO:0004252;GO:0005509;GO:0005509;GO:0005515;GO:0005543;GO:0005576;GO:0005576;GO:0005576;GO:0005576;GO:0005576;GO:0005615;GO:0005788;GO:0005796;GO:0005886;GO:0006508;GO:0006508;GO:0006508;GO:0006888;GO:0007596;GO:0007596;GO:0007596;GO:0007596;GO:0007596;GO:0007596;GO:0007596;GO:0007598;GO:0007599;GO:0008233;GO:0008236;GO:0016787;GO:0030335;GO:0031233;GO:…	K01314	EC:3.4.21.6	COG5640	O	coagulation factor X [Source:HGNCSymbol;Acc:HGNC:3528]	2159	P00742;Q5JVE7
ENSG00000175155	24.9222	35.8431	14.0014	0.390631	-1.35612	0.0176662	0.145688	17	59331655	59401729	+	8701	YPEL2	GO:0005634;GO:0005730;GO:0046872;GO:0005634;GO:0005730;GO:0046872;	-	-	NOG300891	-	yippee like 2 [Source:HGNC Symbol;Acc:HGNC:18326]"	388403	Q96QA6
ENSG00000109321	64.8892	93.1177	36.6607	0.393703	-1.34482	0.0171039	0.142709	4	74445136	74455005	+	1642	AREG	GO:0000139;GO:0000165;GO:0005125;GO:0005154;GO:0005154;GO:0005515;GO:0005576;GO:0005615;GO:0005615;GO:0005615;GO:0005615;GO:0005615;GO:0005634;GO:0005737;GO:0005789;GO:0006888;GO:0007165;GO:0007173;GO:0007173;GO:0007173;GO:0007173;GO:0007186;GO:0007267;GO:0008083;GO:0008083;GO:0008083;GO:0008083;GO:0008284;GO:0008284;GO:0008284;GO:0008284;GO:0009986;GO:0010838;GO:0012507;GO:0014009;GO:0014070;GO:…	K09782	-	NOG41450	-	amphiregulin [Source:HGNC Symbol;Acc:HGNC:651]"	374	P15514
ENSG00000146592	56.7184	81.3212	32.1155	0.394921	-1.34036	0.000416613	0.00787379	7	28299321	28825894	+	11681	CREB5	GO:0000790;GO:0000981;GO:0003676;GO:0003677;GO:0003700;GO:0003700;GO:0003700;GO:0005515;GO:0005634;GO:0006355;GO:0006355;GO:0006357;GO:0006366;GO:0045893;GO:0046872;GO:0070062;GO:0003676;GO:0003676;GO:0000790;GO:0000981;GO:0003676;GO:0003676;GO:0003677;GO:0003700;GO:0003700;GO:0003700;GO:0005515;GO:0005634;GO:0006355;GO:0006355;GO:0006357;GO:0006366;GO:0045893;GO:0046872;GO:0070062;GO:0000790;GO:…	K09047	-	NOG286140	-	cAMP responsive element binding protein 5[Source:HGNC Symbol;Acc:HGNC:16844]	9586	Q02930
ENSG00000119801	347.58	497.335	197.826	0.397773	-1.32998	3.16358e-14	4.25747e-12	2	30146941	30160533	+	3421	YPEL5	GO:0000151;GO:0000151;GO:0000922;GO:0005515;GO:0005576;GO:0005634;GO:0005737;GO:0005813;GO:0005815;GO:0005856;GO:0008283;GO:0030496;GO:0043312;GO:0046872;GO:0097431;GO:1904724;GO:1904813;GO:0000151;GO:0000151;GO:0000922;GO:0005515;GO:0005576;GO:0005634;GO:0005737;GO:0005813;GO:0005815;GO:0005856;GO:0008283;GO:0030496;GO:0043312;GO:0046872;GO:0097431;GO:1904724;GO:1904813;GO:0000151;GO:0000151;GO:…	K23339	-	NOG287152	-	yippee like 5 [Source:HGNC Symbol;Acc:HGNC:18329]"	51646	P62699
ENSG00000100292	915.346	1309.53	521.162	0.397976	-1.32924	3.75046e-24	1.95161e-21	22	35380361	35394207	+	2299	HMOX1	GO:0004392;GO:0004392;GO:0006788;GO:0006788;GO:0046872;GO:0055114;GO:0055114;GO:0001525;GO:0001525;GO:0001666;GO:0001935;GO:0002246;GO:0002686;GO:0004392;GO:0004392;GO:0004392;GO:0004392;GO:0004392;GO:0004392;GO:0004392;GO:0004630;GO:0005198;GO:0005515;GO:0005515;GO:0005615;GO:0005623;GO:0005634;GO:0005634;GO:0005634;GO:0005730;GO:0005783;GO:0005783;GO:0005783;GO:0005783;GO:0005789;GO:0005789;GO:…	K00510	EC:1.14.14.18	COG5398	P	heme oxygenase 1 [Source:HGNC Symbol;Acc:HGNC:5013]"	3162	P09601;Q6FH11
ENSG00000143507	291.677	416.938	166.417	0.399141	-1.32503	5.73473e-09	3.74581e-07	1	221701424	221742089	-	2827	DUSP10	GO:0000188;GO:0000188;GO:0002819;GO:0004721;GO:0004725;GO:0004725;GO:0004725;GO:0005515;GO:0005634;GO:0005634;GO:0005654;GO:0005737;GO:0005737;GO:0005737;GO:0005794;GO:0005829;GO:0006470;GO:0006470;GO:0006470;GO:0006470;GO:0008138;GO:0008138;GO:0008138;GO:0008330;GO:0008432;GO:0010033;GO:0010633;GO:0010633;GO:0016311;GO:0016311;GO:0016311;GO:0016607;GO:0016787;GO:0016791;GO:0016791;GO:0016791;GO:…	K20216	-	COG2453	T	dual specificity phosphatase 10 [Source:HGNCSymbol;Acc:HGNC:3065]	11221	Q9Y6W6
ENSG00000186451	27.4849	39.2731	15.6966	0.399679	-1.32309	0.0141602	0.124679	3	57060664	57075432	+	2190	SPATA12	-	-	-	-	-	spermatogenesis associated 12 [Source:HGNCSymbol;Acc:HGNC:23221]	353324	Q7Z6I5;A0A140VJV7
ENSG00000260458	198.59	283.727	113.452	0.399864	-1.32242	5.46365e-06	0.000193848	17	21692523	21704612	+	2196	KCNJ18	GO:0005242;GO:0005242;GO:0005242;GO:0005242;GO:0005244;GO:0005886;GO:0006811;GO:0006813;GO:0006813;GO:0006813;GO:0016020;GO:0016020;GO:0016020;GO:0016021;GO:0016021;GO:0016021;GO:0034765;GO:0034765;GO:1990573;	K19468	-	-	-	potassium inwardly rectifying channel subfamily Jmember 18 [Source:HGNC Symbol;Acc:HGNC:39080]	100134444	B7U540
ENSG00000113552	1959.06	2793.2	1124.92	0.402733	-1.3121	4.0868e-31	4.25327e-28	5	141991749	142013041	-	3959	GNPDA1	GO:0004342;GO:0004342;GO:0004342;GO:0005737;GO:0005975;GO:0005975;GO:0005975;GO:0006044;GO:0006044;GO:0016787;GO:0004342;GO:0004342;GO:0004342;GO:0004342;GO:0005515;GO:0005737;GO:0005737;GO:0005829;GO:0005975;GO:0005975;GO:0005975;GO:0006043;GO:0006043;GO:0006043;GO:0006044;GO:0006044;GO:0006046;GO:0006048;GO:0006091;GO:0007338;GO:0016787;GO:0019262;GO:0042802;GO:0070062;GO:0004342;GO:0004342;GO:…	K02564	EC:3.5.99.6	COG0363	G	glucosamine-6-phosphate deaminase 1 [Source:HGNCSymbol;Acc:HGNC:4417]	10007	P46926
ENSG00000151012	4906.55	6993.26	2819.85	0.403223	-1.31035	3.68299e-13	4.49181e-11	4	138164097	138242349	-	9645	SLC7A11	GO:0005515;GO:0005791;GO:0005856;GO:0005886;GO:0005886;GO:0005886;GO:0006749;GO:0006865;GO:0006865;GO:0006865;GO:0006865;GO:0006979;GO:0007420;GO:0007420;GO:0008542;GO:0009636;GO:0009986;GO:0014070;GO:0015179;GO:0015327;GO:0016020;GO:0016020;GO:0016020;GO:0016020;GO:0016021;GO:0016021;GO:0016021;GO:0016021;GO:0021591;GO:0021756;GO:0022857;GO:0022857;GO:0030534;GO:0031526;GO:0033029;GO:0034599;GO:…	K13869	-	COG0531	E	solute carrier family 7 member 11 [Source:HGNCSymbol;Acc:HGNC:11059]	23657	Q9UPY5
ENSG00000080854	810.111	1154.56	465.659	0.403321	-1.31	3.12585e-22	1.21994e-19	11	133896438	133956985	-	17879	IGSF9B	GO:0005515;GO:0005886;GO:0007155;GO:0007156;GO:0007399;GO:0014069;GO:0016020;GO:0016021;GO:0019900;GO:0030054;GO:0030425;GO:0043005;GO:0043025;GO:0045202;GO:0045211;GO:0060077;GO:0097151;GO:0098982;GO:0098982;GO:0099560;GO:0099629;GO:0005515;GO:0005886;GO:0007155;GO:0007399;GO:0014069;GO:0016020;GO:0016021;GO:0030054;GO:0043005;GO:0045202;GO:0045211;	K22656	-	NOG303891	-	immunoglobulin superfamily member 9B [Source:HGNCSymbol;Acc:HGNC:32326]	22997	Q9UPX0;Q8N7W7
ENSG00000261652	61.7691	88.0164	35.5218	0.403582	-1.30907	0.000287585	0.00582294	15	55408495	55418798	+	930	C15orf65	-	-	-	-	-	chromosome 15 open reading frame 65 [Source:HGNCSymbol;Acc:HGNC:44654]	145788	H3BRN8
ENSG00000075426	3194.4	4551.51	1837.28	0.403664	-1.30877	5.9632e-30	5.47597e-27	2	28392448	28417317	+	7162	FOSL2	GO:0000790;GO:0000977;GO:0000978;GO:0000981;GO:0000981;GO:0001228;GO:0003677;GO:0003677;GO:0003677;GO:0003700;GO:0003700;GO:0003700;GO:0005515;GO:0005634;GO:0005634;GO:0005634;GO:0005654;GO:0006355;GO:0006355;GO:0006357;GO:0006357;GO:0006357;GO:0006357;GO:0008219;GO:0045944;GO:0000790;GO:0000977;GO:0000977;GO:0000978;GO:0000981;GO:0000981;GO:0001228;GO:0003334;GO:0003677;GO:0003677;GO:0003677;GO:…	K09030	-	NOG301361	-	FOS like 2, AP-1 transcription factor subunit[Source:HGNC Symbol;Acc:HGNC:3798]	2355	P15408;Q9H5M2
ENSG00000167994	462.943	658.012	267.874	0.407096	-1.29656	2.22546e-16	3.73567e-14	11	61897301	61920269	-	3191	RAB3IL1	GO:0005085;GO:0005085;GO:0005085;GO:0005515;GO:0005829;GO:0015031;GO:0017112;GO:0042802;GO:0005085;GO:0005085;GO:0005085;GO:0005085;GO:0005085;GO:0005515;GO:0005829;GO:0015031;GO:0017112;GO:0042802;	K16779	-	NOG299882	-	RAB3A interacting protein like 1 [Source:HGNCSymbol;Acc:HGNC:9780]	5866	Q8TBN0
ENSG00000138100	27.6662	39.3143	16.018	0.407434	-1.29536	0.0173756	0.143899	2	27282429	27307439	+	2727	TRIM54	GO:0005515;GO:0005737;GO:0005856;GO:0005874;GO:0007017;GO:0007026;GO:0007165;GO:0007275;GO:0008270;GO:0008270;GO:0008270;GO:0030018;GO:0030154;GO:0046872;GO:0005515;GO:0005737;GO:0005856;GO:0005874;GO:0005875;GO:0007017;GO:0007026;GO:0007026;GO:0007165;GO:0007275;GO:0008017;GO:0008270;GO:0008270;GO:0008270;GO:0030018;GO:0030154;GO:0046872;	K10653	-	NOG310224	-	tripartite motif containing 54 [Source:HGNCSymbol;Acc:HGNC:16008]	57159	Q9BYV2
ENSG00000166123	638.633	907.246	370.019	0.407849	-1.29389	2.98239e-11	2.83891e-09	16	46884362	46931289	+	6362	GPT2	GO:0003824;GO:0003824;GO:0004021;GO:0004021;GO:0005759;GO:0006103;GO:0008483;GO:0008652;GO:0009058;GO:0009058;GO:0016740;GO:0030170;GO:0030170;GO:0042851;GO:0042853;GO:0003824;GO:0003824;GO:0009058;GO:0009058;GO:0030170;GO:0030170;GO:0003824;GO:0003824;GO:0004021;GO:0004021;GO:0005759;GO:0006103;GO:0008483;GO:0008652;GO:0009058;GO:0009058;GO:0016740;GO:0030170;GO:0030170;GO:0042851;GO:0042853;	K00814	EC:2.6.1.2	COG0436	E	glutamic--pyruvic transaminase 2 [Source:HGNCSymbol;Acc:HGNC:18062]	84706	Q8TD30;A0A024R6R2
ENSG00000157514	705.736	1002.37	409.106	0.408141	-1.29286	2.62484e-20	7.03163e-18	X	107713221	107777342	-	4766	TSC22D3	GO:0003700;GO:0003700;GO:0006355;GO:0006355;GO:0000981;GO:0003700;GO:0003700;GO:0003700;GO:0005634;GO:0005737;GO:0005829;GO:0006355;GO:0006355;GO:0006355;GO:0006357;GO:0034220;GO:0000981;GO:0003700;GO:0003700;GO:0003700;GO:0005634;GO:0005737;GO:0005829;GO:0006355;GO:0006355;GO:0006355;GO:0006357;GO:0034220;GO:0000981;GO:0003700;GO:0003700;GO:0003700;GO:0005634;GO:0005634;GO:0005737;GO:0005829;GO:…	-	-	NOG329226	-	TSC22 domain family member 3 [Source:HGNCSymbol;Acc:HGNC:3051]	1831	Q99576
ENSG00000185567	11669.4	16571.9	6766.96	0.408339	-1.29216	4.88694e-21	1.50793e-18	14	104937244	104978374	-	18788	AHNAK2	GO:0005515;GO:0005634;GO:0005737;GO:0005737;GO:0005829;GO:0005886;GO:0005886;GO:0030018;GO:0030315;GO:0030659;GO:0042383;GO:0043034;GO:0043484;GO:0005515;GO:0005515;GO:0005634;GO:0005737;GO:0005737;GO:0005829;GO:0005886;GO:0005886;GO:0030018;GO:0030315;GO:0030659;GO:0042383;GO:0043034;GO:0043484;	-	-	NOG12793	-	AHNAK nucleoprotein 2 [Source:HGNCSymbol;Acc:HGNC:20125]	113146	Q8IVF2
ENSG00000101384	591.182	839.276	343.088	0.408791	-1.29057	2.13001e-06	8.2306e-05	20	10637684	10673999	-	9298	JAG1	GO:0001525;GO:0001709;GO:0001953;GO:0001974;GO:0002011;GO:0002456;GO:0003180;GO:0003184;GO:0003215;GO:0003215;GO:0005112;GO:0005112;GO:0005112;GO:0005112;GO:0005112;GO:0005198;GO:0005509;GO:0005509;GO:0005515;GO:0005515;GO:0005543;GO:0005576;GO:0005886;GO:0005886;GO:0005886;GO:0005886;GO:0005887;GO:0005912;GO:0005912;GO:0007154;GO:0007154;GO:0007219;GO:0007219;GO:0007219;GO:0007219;GO:0007219;GO:…	K06052	-	NOG12793	-	jagged canonical Notch ligand 1 [Source:HGNCSymbol;Acc:HGNC:6188]	182	P78504;Q99740
ENSG00000158201	677.786	960.132	395.439	0.411859	-1.27978	1.1634e-19	2.92934e-17	18	21650901	21704780	-	4337	ABHD3	GO:0004623;GO:0004623;GO:0005575;GO:0005886;GO:0006629;GO:0006656;GO:0008970;GO:0008970;GO:0008970;GO:0016020;GO:0016021;GO:0016298;GO:0016787;GO:0016788;GO:0034338;GO:0044255;GO:0046470;GO:0046470;GO:0046470;GO:0047372;GO:0052689;GO:0052739;GO:0052740;GO:0102567;GO:0102568;GO:0016020;GO:0016021;GO:0004623;GO:0004623;GO:0005575;GO:0005886;GO:0006629;GO:0006656;GO:0008970;GO:0008970;GO:0008970;GO:…	K13696	-	COG0429	R	abhydrolase domain containing 3 [Source:HGNCSymbol;Acc:HGNC:18718]	171586	Q8WU67
ENSG00000186480	7540	10678.3	4401.66	0.412205	-1.27857	1.92298e-11	1.87886e-09	7	155297776	155310235	+	3650	INSIG1	GO:0006629;GO:0008202;GO:0008203;GO:0008203;GO:0008203;GO:0016020;GO:0016021;GO:0008203;GO:0008203;GO:0016020;GO:0016021;GO:0005515;GO:0005515;GO:0005783;GO:0005789;GO:0005789;GO:0006629;GO:0006641;GO:0006695;GO:0006991;GO:0008202;GO:0008203;GO:0008203;GO:0008203;GO:0008203;GO:0010894;GO:0016020;GO:0016021;GO:0016126;GO:0032933;GO:0032937;GO:0036315;GO:0036316;GO:0042472;GO:0042474;GO:0042632;GO:…	-	-	NOG263628	-	insulin induced gene 1 [Source:HGNCSymbol;Acc:HGNC:6083]	3638	O15503;A0A024RD68
ENSG00000142661	88.7666	125.593	51.9407	0.413565	-1.27382	0.00151668	0.0229344	1	24056035	24112135	-	9214	MYOM3	GO:0005737;GO:0005865;GO:0006936;GO:0006941;GO:0007015;GO:0008307;GO:0030017;GO:0030018;GO:0030240;GO:0030241;GO:0031430;GO:0031430;GO:0042803;GO:0045214;GO:0048739;GO:0051015;GO:0051371;GO:0055003;GO:0055008;GO:0071688;GO:0005515;GO:0005737;GO:0005865;GO:0006936;GO:0006941;GO:0007015;GO:0008307;GO:0030017;GO:0030018;GO:0030240;GO:0030241;GO:0031430;GO:0031430;GO:0031430;GO:0042802;GO:0042803;GO:…	-	-	NOG149189	S	myomesin 3 [Source:HGNC Symbol;Acc:HGNC:26679]"	127294	Q5VTT5
ENSG00000136999	862.657	1220.5	504.81	0.413608	-1.27366	1.30154e-21	4.6178e-19	8	119416446	119424434	+	2614	CCN3	GO:0001525;GO:0002062;GO:0002062;GO:0005112;GO:0005178;GO:0005178;GO:0005515;GO:0005515;GO:0005520;GO:0005520;GO:0005576;GO:0005576;GO:0005576;GO:0005576;GO:0005737;GO:0005737;GO:0005921;GO:0005921;GO:0007155;GO:0007165;GO:0008083;GO:0008201;GO:0010468;GO:0010761;GO:0010832;GO:0014909;GO:0030054;GO:0030308;GO:0030424;GO:0030425;GO:0031012;GO:0033627;GO:0035767;GO:0043025;GO:0043231;GO:0044342;GO:…	K23571	-	NOG72934	S	cellular communication network factor 3 [Source:HGNCSymbol;Acc:HGNC:7885]	4856	P48745;A0A024R9J4
ENSG00000184497	31.8961	45.0707	18.7215	0.415382	-1.26749	0.0116857	0.109236	13	113759226	113816995	+	7301	TMEM255B	GO:0016020;GO:0016021;GO:0016020;GO:0016021;	-	-	NOG46520	-	transmembrane protein 255B [Source:HGNCSymbol;Acc:HGNC:28297]	348013	Q8WV15
ENSG00000164683	233.513	329.699	137.326	0.416521	-1.26354	0.0223993	0.172169	8	79762371	79767857	-	5487	HEY1	GO:0003677;GO:0006355;GO:0046983;GO:0003677;GO:0006355;GO:0046983;GO:0000122;GO:0000122;GO:0000122;GO:0000790;GO:0000977;GO:0000981;GO:0000981;GO:0001227;GO:0001227;GO:0001525;GO:0003184;GO:0003190;GO:0003203;GO:0003208;GO:0003677;GO:0003677;GO:0003677;GO:0003700;GO:0005515;GO:0005515;GO:0005634;GO:0005634;GO:0005654;GO:0005737;GO:0006355;GO:0006355;GO:0007219;GO:0007219;GO:0007275;GO:0008134;GO:…	K09091	-	NOG241271	-	hes related family bHLH transcription factor withYRPW motif 1 [Source:HGNC Symbol;Acc:HGNC:4880]	23462	Q9Y5J3
ENSG00000173805	32.5564	45.927	19.1859	0.417749	-1.25929	0.0113798	0.107147	17	41717742	41734644	-	6223	HAP1	GO:0005730;GO:0005829;GO:0005102;GO:0005515;GO:0005515;GO:0005623;GO:0005634;GO:0005730;GO:0005737;GO:0005737;GO:0005739;GO:0005739;GO:0005764;GO:0005768;GO:0005769;GO:0005776;GO:0005783;GO:0005829;GO:0005856;GO:0005856;GO:0006605;GO:0006887;GO:0006914;GO:0007268;GO:0007420;GO:0008021;GO:0008089;GO:0008089;GO:0008090;GO:0008104;GO:0008104;GO:0015031;GO:0015629;GO:0016234;GO:0017022;GO:0017157;GO:…	K04647	-	NOG246428	-	huntingtin associated protein 1 [Source:HGNCSymbol;Acc:HGNC:4812]	9001	P54257
ENSG00000154153	405.133	571.507	238.759	0.41777	-1.25922	2.84331e-14	3.92804e-12	5	16473038	16617058	-	4568	RETREG1	GO:0030176;GO:0061709;GO:0005515;GO:0005730;GO:0005783;GO:0005783;GO:0005789;GO:0005794;GO:0005801;GO:0006914;GO:0016020;GO:0016021;GO:0016604;GO:0019233;GO:0030176;GO:0030176;GO:0030176;GO:0043524;GO:0061709;GO:0061709;GO:0061709;GO:0005515;GO:0005730;GO:0005783;GO:0005783;GO:0005789;GO:0005794;GO:0005801;GO:0005801;GO:0006914;GO:0016020;GO:0016021;GO:0016604;GO:0019233;GO:0030176;GO:0030176;GO:…	-	-	NOG87326	S	reticulophagy regulator 1 [Source:HGNCSymbol;Acc:HGNC:25964]	54463	Q9H6L5
ENSG00000165606	125.101	176.404	73.7983	0.418349	-1.25722	1.64952e-06	6.50271e-05	10	49364181	49396016	-	2890	DRGX	GO:0000790;GO:0000977;GO:0000981;GO:0000981;GO:0001764;GO:0003677;GO:0003677;GO:0003677;GO:0003677;GO:0005634;GO:0005634;GO:0006355;GO:0006355;GO:0006357;GO:0007275;GO:0007399;GO:0007409;GO:0007411;GO:0009593;GO:0016048;GO:0021516;GO:0021559;GO:0030182;GO:0043565;GO:0043565;GO:0050954;GO:0000790;GO:0000977;GO:0000981;GO:0000981;GO:0003677;GO:0003677;GO:0003677;GO:0005634;GO:0005634;GO:0006355;GO:…	-	-	NOG39948	U	dorsal root ganglia homeobox [Source:HGNCSymbol;Acc:HGNC:21536]	644168	A6NNA5
ENSG00000125657	618.776	872.508	365.045	0.418386	-1.25709	4.02549e-16	6.34766e-14	19	6531026	6535924	+	1634	TNFSF9	GO:0005102;GO:0005125;GO:0005164;GO:0005164;GO:0005515;GO:0005615;GO:0005886;GO:0005886;GO:0006955;GO:0006955;GO:0007165;GO:0007267;GO:0016020;GO:0016020;GO:0016020;GO:0016021;GO:0032813;GO:0032813;GO:0032813;GO:0033209;GO:0042104;GO:0042129;GO:0042981;GO:0045585;	K05472	-	NOG41045	S	TNF superfamily member 9 [Source:HGNCSymbol;Acc:HGNC:11939]	8744	P41273;A0A0U5J8I0
ENSG00000095383	1443.96	2035.01	852.912	0.41912	-1.25456	1.28883e-12	1.4686e-10	9	98199011	98255649	-	3597	TBC1D2	GO:0005096;GO:0005096;GO:0005515;GO:0005654;GO:0005737;GO:0005829;GO:0006886;GO:0017137;GO:0030054;GO:0031410;GO:0043547;GO:0045296;GO:0090630;GO:0005096;GO:0005096;GO:0005515;GO:0005654;GO:0005737;GO:0005829;GO:0006886;GO:0017137;GO:0030054;GO:0031410;GO:0043547;GO:0045296;GO:0090630;GO:0005096;GO:0005096;GO:0005515;GO:0005654;GO:0005737;GO:0005829;GO:0006886;GO:0017137;GO:0030054;GO:0031410;GO:…	K20165	-	COG5210	R	TBC1 domain family member 2 [Source:HGNCSymbol;Acc:HGNC:18026]	55357	Q9BYX2
ENSG00000222009	192.974	271.951	113.996	0.419179	-1.25436	1.83801e-07	8.8939e-06	1	44808482	44815585	+	3520	BTBD19	GO:0005515;GO:0005515;	-	-	NOG331045	-	BTB domain containing 19 [Source:HGNCSymbol;Acc:HGNC:27145]	149478	C9JJ37
ENSG00000066735	5169.48	7273.23	3065.73	0.421508	-1.24637	4.97801e-25	2.78329e-22	14	104138723	104180894	+	6756	KIF26A	GO:0000166;GO:0001560;GO:0001560;GO:0003777;GO:0003777;GO:0005524;GO:0005524;GO:0005524;GO:0005737;GO:0005829;GO:0005856;GO:0005871;GO:0005874;GO:0005874;GO:0006890;GO:0007018;GO:0007018;GO:0008017;GO:0008017;GO:0008017;GO:0008017;GO:0008017;GO:0008574;GO:0009968;GO:0009968;GO:0019886;GO:0048484;GO:0048484;GO:0000166;GO:0003774;GO:0003777;GO:0003777;GO:0005524;GO:0005524;GO:0005524;GO:0007018;GO:…	K10404	-	COG5059	Z	kinesin family member 26A [Source:HGNCSymbol;Acc:HGNC:20226]	26153	Q9ULI4
ENSG00000172006	63.0333	88.6713	37.3954	0.42173	-1.24561	0.000531393	0.0096911	19	2819868	2836735	+	5653	ZNF554	GO:0003676;GO:0003676;GO:0003677;GO:0003700;GO:0005634;GO:0005634;GO:0005654;GO:0005730;GO:0006355;GO:0006355;GO:0043565;GO:0046872;GO:0003676;GO:0003676;GO:0005654;GO:0005730;GO:0006355;GO:0006355;	K09228	-	COG5048	R	zinc finger protein 554 [Source:HGNCSymbol;Acc:HGNC:26629]	115196	Q86TJ5;B3KNM4
ENSG00000074935	347.243	488.37	206.115	0.422047	-1.24453	1.01523e-12	1.18274e-10	6	112070663	112087529	-	7087	TUBE1	GO:0000166;GO:0000226;GO:0000242;GO:0000278;GO:0003924;GO:0003924;GO:0005200;GO:0005200;GO:0005525;GO:0005525;GO:0005525;GO:0005525;GO:0005737;GO:0005737;GO:0005815;GO:0005856;GO:0005874;GO:0005874;GO:0005874;GO:0005874;GO:0007017;GO:0007017;GO:0007017;GO:0007098;GO:0000166;GO:0003924;GO:0003924;GO:0005525;GO:0005525;GO:0005874;GO:0005874;GO:0007017;GO:0003924;GO:0005874;GO:0007017;GO:0003924;GO:…	K10391	-	COG5023	Z	tubulin epsilon 1 [Source:HGNCSymbol;Acc:HGNC:20775]	51175	Q9UJT0
ENSG00000183615	47.2066	66.3628	28.0505	0.422684	-1.24235	0.00275843	0.0370233	1	32247222	32248856	+	947	FAM167B	-	-	-	NOG271116	-	family with sequence similarity 167 member B[Source:HGNC Symbol;Acc:HGNC:28133]	84734	Q9BTA0
ENSG00000241935	21.8524	30.6798	13.0249	0.424543	-1.23602	0.0424056	0.263848	10	97584323	97612802	+	4148	HOGA1	GO:0003824;GO:0003824;GO:0005515;GO:0005739;GO:0005739;GO:0005759;GO:0008700;GO:0008700;GO:0009436;GO:0016829;GO:0016829;GO:0016829;GO:0019470;GO:0033609;GO:0042803;GO:0042866;GO:0046487;GO:0046487;GO:0003824;GO:0003824;GO:0005515;GO:0005739;GO:0005739;GO:0005759;GO:0008700;GO:0008700;GO:0009436;GO:0016829;GO:0016829;GO:0016829;GO:0019470;GO:0033609;GO:0042803;GO:0042866;GO:0046487;GO:0046487;GO:…	K18123	EC:4.1.3.16	COG0329	E	4-hydroxy-2-oxoglutarate aldolase 1 [Source:HGNCSymbol;Acc:HGNC:25155]	112817	Q86XE5
ENSG00000112972	1935.99	2713.61	1158.37	0.426872	-1.22812	5.70179e-14	7.41755e-12	5	43287470	43313512	-	6627	HMGCS1	GO:0001889;GO:0003824;GO:0003824;GO:0004421;GO:0004421;GO:0004421;GO:0004421;GO:0004421;GO:0004421;GO:0004421;GO:0005737;GO:0005737;GO:0005829;GO:0005829;GO:0005829;GO:0006084;GO:0006629;GO:0006629;GO:0006694;GO:0006695;GO:0006695;GO:0007420;GO:0008144;GO:0008202;GO:0008203;GO:0008299;GO:0008299;GO:0008584;GO:0009645;GO:0009725;GO:0010033;GO:0010142;GO:0014070;GO:0014074;GO:0016126;GO:0016740;GO:…	K01641	EC:2.3.3.10	COG3425	I	3-hydroxy-3-methylglutaryl-CoA synthase 1[Source:HGNC Symbol;Acc:HGNC:5007]	3157	Q01581;A0A024R059
ENSG00000136002	1503.58	2105.88	901.277	0.427981	-1.22438	6.1401e-21	1.80855e-18	2	130836916	131047263	+	10611	ARHGEF4	GO:0005085;GO:0005085;GO:0005085;GO:0005515;GO:0035556;GO:0035556;GO:0005085;GO:0005085;GO:0005085;GO:0005515;GO:0005515;GO:0005737;GO:0005829;GO:0005886;GO:0007186;GO:0016020;GO:0019904;GO:0030032;GO:0030676;GO:0032587;GO:0035556;GO:0035556;GO:0042995;GO:0043065;GO:0046847;GO:0051056;GO:0005085;GO:0005085;GO:0005085;GO:0005515;GO:0035556;GO:0035556;GO:0005085;GO:0005085;GO:0005515;GO:0035556;GO:…	K05769	-	COG5422	T	Rho guanine nucleotide exchange factor 4[Source:HGNC Symbol;Acc:HGNC:684]	50649	Q9NR80;Q9NTG0
ENSG00000198870	22.5857	31.6186	13.5529	0.428637	-1.22217	0.0408203	0.257161	9	133376366	133406096	+	4409	STKLD1	GO:0000166;GO:0004672;GO:0004672;GO:0004674;GO:0005524;GO:0005524;GO:0005524;GO:0006468;GO:0006468;	K17546	-	COG0515	T	serine/threonine kinase like domain containing 1[Source:HGNC Symbol;Acc:HGNC:28669]	169436	Q8NE28
ENSG00000187642	25.9934	36.3537	15.6331	0.430027	-1.2175	0.0281108	0.200268	1	975204	982093	-	3424	PERM1	GO:0005634;GO:0005737;GO:0006355;GO:0014850;GO:0005634;GO:0005737;GO:0006355;GO:0014850;	-	-	NOG43522	R	PPARGC1 and ESRR induced regulator, muscle 1[Source:HGNC Symbol;Acc:HGNC:28208]	84808	Q5SV97
ENSG00000106105	6354.98	8879.97	3829.99	0.431306	-1.21322	2.07889e-33	2.95032e-30	7	30594838	30634033	+	3995	GARS1	GO:0000166;GO:0000166;GO:0000166;GO:0004081;GO:0004812;GO:0004812;GO:0004812;GO:0004820;GO:0004820;GO:0004820;GO:0004820;GO:0004820;GO:0005515;GO:0005524;GO:0005524;GO:0005524;GO:0005576;GO:0005737;GO:0005737;GO:0005737;GO:0005737;GO:0005737;GO:0005739;GO:0005739;GO:0005759;GO:0005829;GO:0005829;GO:0006412;GO:0006418;GO:0006418;GO:0006418;GO:0006418;GO:0006426;GO:0006426;GO:0006426;GO:0006426;GO:…	K01880	EC:6.1.1.14	COG0423	J	glycyl-tRNA synthetase 1 [Source:HGNCSymbol;Acc:HGNC:4162]	2617	P41250
ENSG00000101680	2976.73	4155.43	1798.03	0.432695	-1.20858	1.37233e-08	8.43445e-07	18	6941742	7117797	-	15857	LAMA1	GO:0002011;GO:0005102;GO:0005102;GO:0005201;GO:0005201;GO:0005201;GO:0005515;GO:0005576;GO:0005576;GO:0005604;GO:0005604;GO:0005604;GO:0005606;GO:0005606;GO:0005608;GO:0005615;GO:0005911;GO:0006468;GO:0007155;GO:0007155;GO:0007155;GO:0007166;GO:0007166;GO:0007411;GO:0008022;GO:0009887;GO:0009888;GO:0009888;GO:0016020;GO:0030155;GO:0030155;GO:0030198;GO:0030334;GO:0030334;GO:0031012;GO:0031012;GO:…	K05637	-	NOG247347	-	laminin subunit alpha 1 [Source:HGNCSymbol;Acc:HGNC:6481]	284217	P25391
ENSG00000166289	62.7717	87.5882	37.9551	0.433336	-1.20644	0.000770311	0.0132146	19	29665459	29675477	+	2298	PLEKHF1	GO:0005515;GO:0005634;GO:0005737;GO:0005764;GO:0005764;GO:0005765;GO:0005768;GO:0006915;GO:0007032;GO:0010008;GO:0010314;GO:0010508;GO:0016050;GO:0032266;GO:0035091;GO:0046872;GO:0046872;GO:0046872;GO:0048471;GO:0070273;GO:0072659;GO:0005515;GO:0005634;GO:0005737;GO:0005764;GO:0005764;GO:0005764;GO:0005765;GO:0005768;GO:0006915;GO:0007032;GO:0010008;GO:0010314;GO:0010508;GO:0016050;GO:0032266;GO:…	-	-	NOG308864	-	pleckstrin homology and FYVE domain containing 1[Source:HGNC Symbol;Acc:HGNC:20764]	79156	Q96S99
ENSG00000167508	909.317	1268.54	550.094	0.433643	-1.20542	2.65752e-20	7.03163e-18	16	88651935	88663161	-	4717	MVD	GO:0000166;GO:0004163;GO:0004163;GO:0004163;GO:0004163;GO:0005524;GO:0005524;GO:0005524;GO:0005829;GO:0005829;GO:0005829;GO:0005829;GO:0005829;GO:0006489;GO:0006629;GO:0006694;GO:0006695;GO:0006695;GO:0008202;GO:0008203;GO:0008284;GO:0008299;GO:0008299;GO:0008299;GO:0016126;GO:0016829;GO:0016831;GO:0016831;GO:0019287;GO:0019287;GO:0019287;GO:0030544;GO:0042803;GO:0045540;GO:0008299;GO:0008299;GO:…	K01597	EC:4.1.1.33	COG3407	I	mevalonate diphosphate decarboxylase [Source:HGNCSymbol;Acc:HGNC:7529]	4597	P53602
ENSG00000134070	130.393	181.851	78.9352	0.434065	-1.20402	2.75122e-06	0.000102996	3	10164919	10243745	+	3431	IRAK2	GO:0000166;GO:0000187;GO:0001959;GO:0001959;GO:0001959;GO:0002224;GO:0002755;GO:0002755;GO:0002755;GO:0002755;GO:0004672;GO:0004672;GO:0004674;GO:0005515;GO:0005515;GO:0005524;GO:0005524;GO:0005524;GO:0005634;GO:0005737;GO:0005829;GO:0005886;GO:0005886;GO:0006468;GO:0006468;GO:0006468;GO:0006954;GO:0006954;GO:0006954;GO:0007165;GO:0007165;GO:0007249;GO:0007249;GO:0007249;GO:0007249;GO:0007254;GO:…	K04731	EC:2.7.11.1	COG0515	T	interleukin 1 receptor associated kinase 2[Source:HGNC Symbol;Acc:HGNC:6113]	3656	O43187
ENSG00000129422	1126.95	1571.39	682.509	0.434334	-1.20312	1.60371e-05	0.000503733	8	17643795	17800917	-	12010	MTUS1	GO:0005615;GO:0005634;GO:0005634;GO:0005730;GO:0005737;GO:0005737;GO:0005739;GO:0005794;GO:0005815;GO:0005819;GO:0005856;GO:0005874;GO:0005886;GO:0008017;GO:0010758;GO:0015630;GO:0016020;GO:0005615;GO:0005634;GO:0005634;GO:0005730;GO:0005737;GO:0005737;GO:0005739;GO:0005794;GO:0005815;GO:0005819;GO:0005856;GO:0005874;GO:0005886;GO:0008017;GO:0010758;GO:0015630;GO:0016020;GO:0005615;GO:0005634;GO:…	-	-	NOG117251	S	microtubule associated scaffold protein 1[Source:HGNC Symbol;Acc:HGNC:29789]	57509	Q9ULD2
ENSG00000116717	570.803	795.896	345.709	0.434364	-1.20302	4.14128e-16	6.46495e-14	1	67685201	67688334	+	1925	GADD45A	GO:0000079;GO:0000122;GO:0000185;GO:0000185;GO:0005515;GO:0005515;GO:0005634;GO:0005634;GO:0005634;GO:0005634;GO:0005634;GO:0005634;GO:0005654;GO:0005737;GO:0005737;GO:0006281;GO:0006469;GO:0006915;GO:0006974;GO:0006977;GO:0007049;GO:0007050;GO:0007050;GO:0007098;GO:0016525;GO:0016607;GO:0019900;GO:0033140;GO:0033140;GO:0042770;GO:0042803;GO:0043065;GO:0043537;GO:0043537;GO:0046330;GO:0046982;GO:…	K04402	-	NOG75953	S	growth arrest and DNA damage inducible alpha[Source:HGNC Symbol;Acc:HGNC:4095]	1647	P24522
ENSG00000110195	20871.3	29092.4	12650.2	0.43483	-1.20148	3.80921e-17	6.99594e-15	11	72189558	72196323	+	1584	FOLR1	GO:0000139;GO:0001947;GO:0003147;GO:0003253;GO:0005542;GO:0005542;GO:0005542;GO:0005542;GO:0005542;GO:0005576;GO:0005634;GO:0005768;GO:0005789;GO:0005886;GO:0006888;GO:0006898;GO:0008144;GO:0009986;GO:0012507;GO:0015884;GO:0015884;GO:0016020;GO:0016020;GO:0016021;GO:0016323;GO:0016324;GO:0016324;GO:0017015;GO:0030133;GO:0030136;GO:0031103;GO:0031225;GO:0031362;GO:0031362;GO:0031410;GO:0033116;GO:…	K13649	-	NOG26606	S	folate receptor alpha [Source:HGNCSymbol;Acc:HGNC:3791]	2348	P15328;A0A024R5H1
ENSG00000179546	101.234	141.087	61.3809	0.435057	-1.20073	2.80561e-05	0.000818661	1	23191895	23194729	-	2835	HTR1D	GO:0004930;GO:0004930;GO:0004930;GO:0004930;GO:0004993;GO:0004993;GO:0004993;GO:0004993;GO:0004993;GO:0005886;GO:0005886;GO:0005887;GO:0005887;GO:0005887;GO:0005887;GO:0005887;GO:0006939;GO:0006939;GO:0007165;GO:0007186;GO:0007186;GO:0007186;GO:0007186;GO:0007187;GO:0007187;GO:0007193;GO:0007268;GO:0007268;GO:0007268;GO:0007268;GO:0014827;GO:0016020;GO:0016021;GO:0016021;GO:0016021;GO:0030425;GO:…	K04153	-	NOG249628	-	5-hydroxytryptamine receptor 1D [Source:HGNCSymbol;Acc:HGNC:5289]	3352	P28221
ENSG00000105327	141.961	197.753	86.1681	0.435736	-1.19847	1.31127e-06	5.30316e-05	19	47220822	47232766	-	3185	BBC3	GO:0001836;GO:0005515;GO:0005739;GO:0005739;GO:0005739;GO:0005739;GO:0005764;GO:0006915;GO:0006919;GO:0043065;GO:0043065;GO:0043065;GO:0043280;GO:0051117;GO:0070059;GO:0090200;GO:0090200;GO:0090200;GO:0097193;GO:0097193;GO:0097194;GO:1900740;GO:2001056;GO:2001244;GO:0001836;GO:0005515;GO:0005739;GO:0005739;GO:0005739;GO:0005739;GO:0005764;GO:0006915;GO:0006919;GO:0043065;GO:0043065;GO:0043065;GO:…	K10132	-	prNOG22537	-	BCL2 binding component 3 [Source:HGNCSymbol;Acc:HGNC:17868]	27113	Q96PG8;Q9BXH1
ENSG00000128272	6572.6	9153.87	3991.33	0.436027	-1.19751	9.43223e-33	1.22706e-29	22	39519695	39522685	+	2514	ATF4	GO:0000790;GO:0000977;GO:0000978;GO:0000981;GO:0000981;GO:0000981;GO:0001085;GO:0003677;GO:0003700;GO:0003700;GO:0003700;GO:0005515;GO:0005515;GO:0005515;GO:0005623;GO:0005634;GO:0005634;GO:0005634;GO:0005634;GO:0005634;GO:0005634;GO:0005654;GO:0005737;GO:0005737;GO:0005737;GO:0005737;GO:0005813;GO:0005815;GO:0005856;GO:0005886;GO:0006094;GO:0006355;GO:0006355;GO:0006355;GO:0006357;GO:0006357;GO:…	K04374	-	NOG325856	-	activating transcription factor 4 [Source:HGNCSymbol;Acc:HGNC:786]	468	P18848
ENSG00000123700	61.8007	85.9993	37.602	0.437236	-1.19352	0.000948296	0.0157363	17	70168673	70180044	+	5576	KCNJ2	GO:0005242;GO:0005242;GO:0005242;GO:0005242;GO:0005242;GO:0005244;GO:0005546;GO:0005623;GO:0005886;GO:0005887;GO:0006811;GO:0006813;GO:0006813;GO:0006813;GO:0008076;GO:0014861;GO:0016020;GO:0016020;GO:0016020;GO:0016021;GO:0016021;GO:0016021;GO:0030007;GO:0031224;GO:0034765;GO:0034765;GO:0051289;GO:0055119;GO:0060075;GO:0060306;GO:0061337;GO:0071805;GO:0086002;GO:0086008;GO:0086011;GO:0086012;GO:…	K04996	-	NOG72812	S	potassium inwardly rectifying channel subfamily Jmember 2 [Source:HGNC Symbol;Acc:HGNC:6263]	3759	P63252
ENSG00000223573	990.449	1377.65	603.246	0.43788	-1.19139	1.20005e-20	3.35866e-18	19	5558167	5578349	-	4429	TINCR	GO:0005515;GO:0005515;GO:0005515;	-	-	-	-	TINCR ubiquitin domain containing [Source:HGNCSymbol;Acc:HGNC:14607]	257000	-
ENSG00000135842	477.141	662.701	291.58	0.439988	-1.18447	3.56031e-11	3.30833e-09	1	184790724	184974508	-	8330	NIBAN1	GO:0001933;GO:0001933;GO:0001934;GO:0001934;GO:0003674;GO:0005515;GO:0005737;GO:0005829;GO:0005886;GO:0006417;GO:0016020;GO:0034976;GO:0034976;GO:0045727;GO:0045727;GO:0070062;	-	-	NOG46977	O	niban apoptosis regulator 1 [Source:HGNCSymbol;Acc:HGNC:16784]	116496	Q9BZQ8;A0A024R978
ENSG00000186832	99.9873	138.864	61.1107	0.440076	-1.18418	4.42959e-05	0.00121316	17	41609778	41615899	-	2477	KRT16	GO:0002009;GO:0002009;GO:0005198;GO:0005198;GO:0005200;GO:0005200;GO:0005515;GO:0005634;GO:0005829;GO:0005856;GO:0005882;GO:0005882;GO:0006954;GO:0006954;GO:0007010;GO:0007568;GO:0030216;GO:0030216;GO:0030336;GO:0031424;GO:0031424;GO:0031424;GO:0042633;GO:0045087;GO:0045087;GO:0045104;GO:0051546;GO:0051546;GO:0061436;GO:0061436;GO:0070062;GO:0070268;GO:0005198;GO:0005198;GO:0005882;GO:0005198;GO:…	K07604	-	NOG148784	S	keratin 16 [Source:HGNC Symbol;Acc:HGNC:6423]"	3868	P08779
ENSG00000179476	28.7388	39.9074	17.5702	0.440273	-1.18353	0.0268184	0.194784	14	44897275	44907257	+	3884	C14orf28	-	-	-	NOG74316	V	chromosome 14 open reading frame 28 [Source:HGNCSymbol;Acc:HGNC:19834]	122525	Q4W4Y0
ENSG00000120129	3420.96	4748.97	2092.95	0.440716	-1.18208	1.13806e-13	1.44441e-11	5	172768096	172771195	-	2013	DUSP1	GO:0000188;GO:0000188;GO:0001706;GO:0004721;GO:0004722;GO:0004722;GO:0004725;GO:0004725;GO:0004725;GO:0004725;GO:0005515;GO:0005634;GO:0005634;GO:0005634;GO:0005737;GO:0005737;GO:0006470;GO:0006470;GO:0006470;GO:0007049;GO:0007162;GO:0008138;GO:0008138;GO:0008138;GO:0008138;GO:0008285;GO:0008330;GO:0009416;GO:0010033;GO:0016311;GO:0016311;GO:0016787;GO:0016791;GO:0016791;GO:0017017;GO:0017017;GO:…	K21278	-	COG2453	T	dual specificity phosphatase 1 [Source:HGNCSymbol;Acc:HGNC:3064]	1843	P28562;B4DU40
ENSG00000204941	31.3862	43.5388	19.2336	0.441758	-1.17867	0.0194325	0.156857	19	43166256	43186536	-	4678	PSG5	GO:0005515;GO:0005576;GO:0007565;GO:0005515;GO:0005576;GO:0007565;GO:0005515;GO:0005576;GO:0007565;	K06500	-	KOG4475	T	pregnancy specific beta-1-glycoprotein 5[Source:HGNC Symbol;Acc:HGNC:9522]	5673	Q15238;A0A024R0S1
ENSG00000110619	1208.04	1675.57	740.503	0.441941	-1.17807	9.22833e-22	3.51374e-19	11	3000922	3057613	-	10037	CARS1	GO:0000049;GO:0000166;GO:0000166;GO:0000166;GO:0004812;GO:0004812;GO:0004812;GO:0004817;GO:0004817;GO:0004817;GO:0004817;GO:0005515;GO:0005524;GO:0005524;GO:0005524;GO:0005524;GO:0005737;GO:0005737;GO:0005829;GO:0005829;GO:0006412;GO:0006418;GO:0006418;GO:0006418;GO:0006423;GO:0006423;GO:0006423;GO:0006423;GO:0016874;GO:0042802;GO:0046872;GO:0000049;GO:0000166;GO:0000166;GO:0000166;GO:0004812;GO:…	K01883	EC:6.1.1.16	COG0215	J	cysteinyl-tRNA synthetase 1 [Source:HGNCSymbol;Acc:HGNC:1493]	833	P49589;A0A024RCG3
ENSG00000138166	592.739	821.594	363.885	0.442901	-1.17494	0.00107931	0.0176246	10	110497907	110511533	+	2535	DUSP5	GO:0000165;GO:0000187;GO:0000188;GO:0001706;GO:0004721;GO:0004725;GO:0004725;GO:0004725;GO:0004725;GO:0005515;GO:0005634;GO:0005634;GO:0005654;GO:0005737;GO:0006470;GO:0006470;GO:0006470;GO:0008138;GO:0008138;GO:0008138;GO:0008138;GO:0016311;GO:0016311;GO:0016311;GO:0016787;GO:0016791;GO:0016791;GO:0016791;GO:0017017;GO:0017017;GO:0017017;GO:0035335;GO:0035970;	K04459	-	COG2453	T	dual specificity phosphatase 5 [Source:HGNCSymbol;Acc:HGNC:3071]	1847	Q16690
ENSG00000065060	1502.32	2082.28	922.349	0.442951	-1.17478	1.94578e-23	9.49234e-21	6	34792015	34883138	+	9908	UHRF1BP1	GO:0005515;GO:0042802;GO:0042826;GO:0042826;	-	-	NOG267311	-	UHRF1 binding protein 1 [Source:HGNCSymbol;Acc:HGNC:21216]	54887	Q6BDS2
ENSG00000187678	99.4275	137.76	61.0948	0.443486	-1.17304	0.000568586	0.0101558	5	142310427	142326455	-	6565	SPRY4	GO:0007275;GO:0007275;GO:0009966;GO:0009966;GO:0016020;GO:0016020;GO:0043407;GO:0070373;GO:0070373;GO:1990830;GO:0005515;GO:0005737;GO:0005829;GO:0005886;GO:0005925;GO:0007275;GO:0007275;GO:0007275;GO:0009966;GO:0009966;GO:0016020;GO:0016020;GO:0016020;GO:0032587;GO:0040037;GO:0042995;GO:0043407;GO:0046580;GO:0048513;GO:0070373;GO:0070373;GO:0070373;GO:0070373;	K17385	-	NOG68509	S	sprouty RTK signaling antagonist 4 [Source:HGNCSymbol;Acc:HGNC:15533]	-	-
ENSG00000170786	34.6725	48.0313	21.3138	0.443748	-1.17219	0.0149674	0.129634	8	56300010	56320776	-	3279	SDR16C5	GO:0000122;GO:0000785;GO:0003714;GO:0004745;GO:0004745;GO:0005634;GO:0005783;GO:0005783;GO:0005789;GO:0005789;GO:0005811;GO:0005886;GO:0008134;GO:0016020;GO:0016021;GO:0016491;GO:0016616;GO:0017053;GO:0031065;GO:0033613;GO:0035067;GO:0042572;GO:0042572;GO:0042574;GO:0042574;GO:0043616;GO:0055114;GO:0000122;GO:0000785;GO:0003714;GO:0004745;GO:0004745;GO:0005634;GO:0005783;GO:0005783;GO:0005789;GO:…	K15734	EC:1.1.1.105	COG1028	IQ	short chain dehydrogenase/reductase family 16Cmember 5 [Source:HGNC Symbol;Acc:HGNC:30311]	195814	Q8N3Y7;B3KT84
ENSG00000113163	721.235	998.802	443.668	0.4442	-1.17072	2.63494e-17	5.01635e-15	5	75356345	75512138	-	18075	CERT1	GO:0008289;GO:0008289;GO:0008289;GO:0008289;GO:0005515;GO:0005515;GO:0005581;GO:0005654;GO:0005737;GO:0005783;GO:0005789;GO:0005794;GO:0005794;GO:0005794;GO:0005829;GO:0005829;GO:0006869;GO:0006955;GO:0008289;GO:0008289;GO:0008289;GO:0008289;GO:0016020;GO:0016310;GO:0030148;GO:0035621;GO:0035621;GO:0035627;GO:0048471;GO:0070273;GO:0097001;GO:0120009;GO:0120012;GO:0120017;GO:1902387;GO:1902388;GO:…	K08283	-	NOG238964	-	ceramide transporter 1 [Source:HGNCSymbol;Acc:HGNC:2205]	10087	Q9Y5P4
ENSG00000135709	246.043	340.552	151.534	0.444968	-1.16823	0.000321097	0.00631315	16	85027751	85094230	+	8837	KIAA0513	GO:0005737;GO:0005737;GO:0005737;GO:0005737;	-	-	NOG67656	-	KIAA0513 [Source:HGNC Symbol;Acc:HGNC:29058]"	9764	O60268
ENSG00000117479	1135.16	1570.17	700.155	0.445912	-1.16517	5.91333e-21	1.77525e-18	1	169463909	169485944	-	4364	SLC19A2	GO:0005515;GO:0005886;GO:0005886;GO:0005886;GO:0005886;GO:0008517;GO:0015234;GO:0015234;GO:0015234;GO:0015234;GO:0015884;GO:0015888;GO:0015888;GO:0015888;GO:0016020;GO:0016021;GO:0016021;GO:0016021;GO:0042723;GO:0051180;GO:0051180;GO:0055085;GO:0071934;GO:0071934;GO:0090482;GO:0090482;GO:0005515;GO:0005886;GO:0005886;GO:0005886;GO:0008517;GO:0015234;GO:0015234;GO:0015234;GO:0015884;GO:0015888;GO:…	K14610	-	NOG241030	-	solute carrier family 19 member 2 [Source:HGNCSymbol;Acc:HGNC:10938]	10560	O60779;A0A024R928
ENSG00000134107	3383.89	4679.04	2088.74	0.446405	-1.16358	0.000640181	0.0112544	3	4979437	4985323	+	3516	BHLHE40	GO:0000122;GO:0000122;GO:0000122;GO:0000790;GO:0000977;GO:0000978;GO:0000981;GO:0000981;GO:0000981;GO:0001102;GO:0001102;GO:0001227;GO:0001227;GO:0001227;GO:0003677;GO:0003677;GO:0003677;GO:0003677;GO:0003700;GO:0003714;GO:0003714;GO:0005515;GO:0005515;GO:0005634;GO:0005634;GO:0005634;GO:0005634;GO:0005737;GO:0006355;GO:0006355;GO:0006355;GO:0006357;GO:0007623;GO:0007623;GO:0009416;GO:0009952;GO:…	K03729	-	NOG281955	-	basic helix-loop-helix family member e40[Source:HGNC Symbol;Acc:HGNC:1046]	8553	O14503;Q6IB83
ENSG00000179046	166.814	230.517	103.111	0.447306	-1.16067	4.67372e-07	2.07277e-05	4	188091273	188109603	-	3050	TRIML2	GO:0005515;GO:0005515;GO:0008270;GO:0010033;GO:0016567;GO:0016740;GO:0032526;GO:0005515;	K12039	-	NOG280756	-	tripartite motif family like 2 [Source:HGNCSymbol;Acc:HGNC:26378]	205860	Q8N7C3
ENSG00000217128	1199.29	1656.95	741.625	0.447583	-1.15977	3.07613e-21	1.02173e-18	5	131641714	131797063	-	7942	FNIP1	GO:0000122;GO:0001932;GO:0001934;GO:0002327;GO:0002904;GO:0005085;GO:0005515;GO:0005515;GO:0005515;GO:0005737;GO:0005765;GO:0005829;GO:0009267;GO:0019899;GO:0031334;GO:0031929;GO:0032007;GO:0032008;GO:0033138;GO:0042030;GO:0043154;GO:0051087;GO:2000973;GO:0000122;GO:0001932;GO:0001934;GO:0002327;GO:0002327;GO:0002904;GO:0002904;GO:0005085;GO:0005515;GO:0005515;GO:0005515;GO:0005737;GO:0005737;GO:…	K20400	-	NOG330489	-	folliculin interacting protein 1 [Source:HGNCSymbol;Acc:HGNC:29418]	96459	Q8TF40
ENSG00000103249	1304.79	1799.33	810.249	0.450306	-1.15102	1.83675e-21	6.37191e-19	16	1444934	1475084	-	7623	CLCN7	GO:0000166;GO:0005247;GO:0005247;GO:0005254;GO:0005524;GO:0005654;GO:0005764;GO:0005765;GO:0005765;GO:0006811;GO:0006821;GO:0006821;GO:0009268;GO:0015108;GO:0015297;GO:0016020;GO:0016020;GO:0016020;GO:0016021;GO:0022857;GO:0031410;GO:0034220;GO:0043231;GO:0055085;GO:0055085;GO:1902476;GO:0000166;GO:0005247;GO:0005247;GO:0005254;GO:0005524;GO:0005654;GO:0005764;GO:0005765;GO:0005765;GO:0006811;GO:…	K05016	-	COG0038	P	chloride voltage-gated channel 7 [Source:HGNCSymbol;Acc:HGNC:2025]	1186	P51798
ENSG00000160200	150.353	207.274	93.4328	0.450769	-1.14954	0.000152569	0.00341226	21	43053191	43076943	-	6786	CBS	GO:0003824;GO:0004122;GO:0004122;GO:0004122;GO:0004122;GO:0004124;GO:0005515;GO:0005515;GO:0005634;GO:0005737;GO:0005737;GO:0005737;GO:0005737;GO:0005829;GO:0005829;GO:0006535;GO:0006535;GO:0006535;GO:0006563;GO:0006565;GO:0008152;GO:0008652;GO:0016829;GO:0019343;GO:0019343;GO:0019344;GO:0019344;GO:0019346;GO:0019346;GO:0019448;GO:0019825;GO:0019899;GO:0020037;GO:0020037;GO:0020037;GO:0030170;GO:…	K01697	EC:4.2.1.22	COG0031	E	cystathionine beta-synthase [Source:HGNCSymbol;Acc:HGNC:1550]	875	P0DN79;P35520;Q9NTF0
ENSG00000123836	3031.95	4176.65	1887.25	0.451858	-1.14606	1.35168e-25	8.44045e-23	1	207034366	207081024	+	10176	PFKFB2	GO:0003824;GO:0003824;GO:0003873;GO:0003873;GO:0005524;GO:0005524;GO:0006000;GO:0006000;GO:0006003;GO:0006003;GO:0046835;GO:0003824;GO:0003824;GO:0005524;GO:0005524;GO:0006003;GO:0006003;GO:0003824;GO:0003873;GO:0005524;GO:0006000;GO:0006003;GO:0046835;GO:0000166;GO:0003824;GO:0003824;GO:0003824;GO:0003873;GO:0003873;GO:0003873;GO:0003873;GO:0003873;GO:0004331;GO:0004331;GO:0004331;GO:0005515;GO:…	K19029	-	COG0406	G	6-phosphofructo-2-kinase/fructose-2,6-biphosphatase2 [Source:HGNC Symbol;Acc:HGNC:8873]	5208	O60825
ENSG00000169891	227.495	313.328	141.662	0.452119	-1.14523	1.86473e-08	1.10685e-06	X	16946658	17153272	+	11336	REPS2	GO:0005509;GO:0005509;GO:0005509;GO:0005515;GO:0005515;GO:0005515;GO:0005737;GO:0005829;GO:0007173;GO:0046872;GO:0061024;GO:0065003;GO:0005509;GO:0005509;GO:0005509;GO:0005515;GO:0005515;GO:0005515;GO:0005737;GO:0005829;GO:0007173;GO:0046872;GO:0061024;GO:0065003;	K20068	-	NOG271782	-	RALBP1 associated Eps domain containing 2[Source:HGNC Symbol;Acc:HGNC:9963]	9185	Q8NFH8
ENSG00000196407	66.6215	91.7351	41.508	0.452477	-1.14408	0.00109094	0.0177588	1	151847101	151853712	-	1161	THEM5	GO:0005515;GO:0005739;GO:0005759;GO:0005759;GO:0006629;GO:0006631;GO:0006637;GO:0016290;GO:0016787;GO:0035336;GO:0035965;GO:0035965;GO:0102991;	K22554	EC:3.1.2.2	NOG261044	-	thioesterase superfamily member 5 [Source:HGNCSymbol;Acc:HGNC:26755]	284486	Q8N1Q8
ENSG00000185022	284.258	391.055	177.461	0.4538	-1.13987	0.000784671	0.0134315	22	38200767	38216507	+	5611	MAFF	GO:0000790;GO:0000978;GO:0000981;GO:0001228;GO:0003677;GO:0003677;GO:0003677;GO:0003700;GO:0003700;GO:0003700;GO:0005515;GO:0005634;GO:0005634;GO:0005634;GO:0005634;GO:0005654;GO:0005654;GO:0005739;GO:0006355;GO:0006355;GO:0006366;GO:0007567;GO:0007596;GO:0043565;GO:0043565;GO:0045604;GO:0045944;GO:0000790;GO:0000978;GO:0000981;GO:0001228;GO:0001701;GO:0003677;GO:0003677;GO:0003677;GO:0003700;GO:…	K09037	-	NOG315640	-	MAF bZIP transcription factor F [Source:HGNCSymbol;Acc:HGNC:6780]	23764	Q9ULX9
ENSG00000126217	1838.45	2526.72	1150.17	0.455205	-1.13541	9.71567e-19	2.19814e-16	13	112894378	113099742	+	23158	MCF2L	GO:0005085;GO:0005085;GO:0005085;GO:0005515;GO:0005615;GO:0005737;GO:0005829;GO:0005886;GO:0007186;GO:0008289;GO:0012505;GO:0016020;GO:0035091;GO:0035556;GO:0035556;GO:0043065;GO:0051056;GO:0005085;GO:0005085;GO:0005085;GO:0005515;GO:0005615;GO:0005737;GO:0005829;GO:0005886;GO:0007186;GO:0008289;GO:0012505;GO:0016020;GO:0035091;GO:0035556;GO:0035556;GO:0043065;GO:0051056;GO:0005085;GO:0005085;GO:…	K20685	-	NOG315020	-	MCF.2 cell line derived transforming sequence like[Source:HGNC Symbol;Acc:HGNC:14576]	23263	O15068
ENSG00000173281	350.038	480.87	219.207	0.455855	-1.13335	0.000870691	0.0146939	8	9136255	9151574	-	5738	PPP1R3B	GO:0000164;GO:0000164;GO:0000164;GO:0004721;GO:0005515;GO:0005515;GO:0005975;GO:0005977;GO:0005979;GO:0005981;GO:0005981;GO:0005981;GO:0005981;GO:0006470;GO:0019888;GO:0019888;GO:0019888;GO:0019899;GO:0042587;GO:0043231;GO:0043666;GO:0050196;GO:0000164;GO:0000164;GO:0005515;GO:0005515;GO:0005975;GO:0005977;GO:0005981;GO:0005981;GO:0005981;GO:0006470;GO:0019888;GO:0019888;GO:0043666;	K07189	-	NOG328473	-	protein phosphatase 1 regulatory subunit 3B[Source:HGNC Symbol;Acc:HGNC:14942]	79660	Q86XI6
ENSG00000172594	48.2246	66.2391	30.2101	0.456077	-1.13265	0.00539844	0.0620125	6	122789049	122809720	+	2349	SMPDL3A	GO:0005515;GO:0005576;GO:0005615;GO:0005615;GO:0005615;GO:0008081;GO:0008081;GO:0008270;GO:0009143;GO:0016787;GO:0016787;GO:0016787;GO:0046872;GO:0070062;GO:0004767;GO:0005515;GO:0005576;GO:0005576;GO:0005615;GO:0005615;GO:0005615;GO:0005615;GO:0005615;GO:0006685;GO:0008081;GO:0008081;GO:0008270;GO:0009143;GO:0016787;GO:0016787;GO:0016787;GO:0046872;GO:0070062;	K01128	EC:3.1.4.-	NOG303902	-	sphingomyelin phosphodiesterase acid like 3A[Source:HGNC Symbol;Acc:HGNC:17389]	10924	Q92484
ENSG00000120875	2662.42	3655.09	1669.76	0.456831	-1.13027	9.51143e-07	3.95955e-05	8	29333064	29350684	-	7273	DUSP4	GO:0000188;GO:0000188;GO:0001706;GO:0004721;GO:0004725;GO:0004725;GO:0004725;GO:0005515;GO:0005634;GO:0005634;GO:0005654;GO:0005654;GO:0005737;GO:0006470;GO:0006470;GO:0008138;GO:0008138;GO:0008138;GO:0008330;GO:0016311;GO:0016311;GO:0016311;GO:0016787;GO:0016791;GO:0016791;GO:0016791;GO:0017017;GO:0017017;GO:0017017;GO:0035335;GO:0035970;GO:0070373;GO:1990439;GO:0000188;GO:0000188;GO:0001706;GO:…	K04459	-	COG2453	T	dual specificity phosphatase 4 [Source:HGNCSymbol;Acc:HGNC:3070]	1846	Q13115
ENSG00000153879	1092.71	1498.53	686.892	0.458379	-1.12539	2.26017e-19	5.42824e-17	19	33373685	33382686	+	4056	CEBPG	GO:0000790;GO:0000981;GO:0001228;GO:0001889;GO:0003677;GO:0003700;GO:0005515;GO:0005515;GO:0005634;GO:0005654;GO:0006355;GO:0006357;GO:0006955;GO:0008134;GO:0030183;GO:0042267;GO:0043353;GO:0043388;GO:0043433;GO:0043565;GO:0045078;GO:0045739;GO:0045944;GO:0051091;GO:0000790;GO:0000981;GO:0001228;GO:0001889;GO:0003677;GO:0003700;GO:0003700;GO:0005515;GO:0005515;GO:0005634;GO:0005654;GO:0006355;GO:…	K10049	-	NOG281019	-	CCAAT enhancer binding protein gamma [Source:HGNCSymbol;Acc:HGNC:1837]	1054	P53567
ENSG00000004799	3411.47	4676.74	2146.21	0.458912	-1.12371	5.10134e-08	2.79428e-06	7	95583499	95596516	-	4544	PDK4	GO:0000166;GO:0004672;GO:0004672;GO:0004672;GO:0004672;GO:0004674;GO:0004740;GO:0004740;GO:0005524;GO:0005739;GO:0005739;GO:0005739;GO:0005759;GO:0005759;GO:0005975;GO:0006006;GO:0006468;GO:0006885;GO:0006885;GO:0008286;GO:0008286;GO:0009267;GO:0010510;GO:0010510;GO:0010510;GO:0010565;GO:0010565;GO:0010906;GO:0010906;GO:0016301;GO:0016310;GO:0016740;GO:0042304;GO:0042304;GO:0042593;GO:0042593;GO:…	K00898	EC:2.7.11.2	COG0642	T	pyruvate dehydrogenase kinase 4 [Source:HGNCSymbol;Acc:HGNC:8812]	5166	Q16654;A4D1H4
ENSG00000149380	930.871	1275.96	585.785	0.459094	-1.12314	5.41095e-18	1.09956e-15	11	74235801	74311640	-	3990	P4HA3	GO:0004656;GO:0004656;GO:0004656;GO:0005506;GO:0005515;GO:0005783;GO:0005783;GO:0005783;GO:0005788;GO:0005788;GO:0016491;GO:0016491;GO:0016702;GO:0016705;GO:0018401;GO:0031418;GO:0031418;GO:0046872;GO:0051213;GO:0055114;GO:0055114;GO:0004656;GO:0004656;GO:0004656;GO:0004656;GO:0005506;GO:0005506;GO:0005515;GO:0005515;GO:0005783;GO:0005783;GO:0005783;GO:0005783;GO:0005788;GO:0005788;GO:0016491;GO:…	K00472	EC:1.14.11.2	NOG289769	-	prolyl 4-hydroxylase subunit alpha 3 [Source:HGNCSymbol;Acc:HGNC:30135]	283208	Q7Z4N8
ENSG00000078269	1206.18	1653.31	759.046	0.459108	-1.12309	5.69272e-20	1.45687e-17	6	157981863	158099176	+	12517	SYNJ2	GO:0003676;GO:0003676;GO:0003723;GO:0004439;GO:0004439;GO:0004439;GO:0005515;GO:0005737;GO:0005829;GO:0005856;GO:0005886;GO:0006661;GO:0007420;GO:0016020;GO:0016787;GO:0017124;GO:0030054;GO:0034595;GO:0034595;GO:0042578;GO:0042578;GO:0042995;GO:0045121;GO:0045202;GO:0046855;GO:0046856;GO:0046856;GO:0046856;GO:0048471;GO:0061024;GO:0098793;GO:0098793;GO:0003676;GO:0003676;GO:0003723;GO:0004439;GO:…	K20279	EC:3.1.3.36	COG5411	T	synaptojanin 2 [Source:HGNC Symbol;Acc:HGNC:11504]"	8871	O15056;B4DG94
ENSG00000070759	108.352	148.38	68.3242	0.460467	-1.11883	5.58987e-05	0.00149424	1	45343883	45491163	-	3319	TESK2	GO:0000166;GO:0004672;GO:0004672;GO:0004672;GO:0004674;GO:0004674;GO:0004712;GO:0004713;GO:0005515;GO:0005524;GO:0005524;GO:0005524;GO:0005634;GO:0005634;GO:0005654;GO:0005737;GO:0006468;GO:0006468;GO:0006468;GO:0007283;GO:0007283;GO:0016301;GO:0016310;GO:0016604;GO:0016740;GO:0018108;GO:0030036;GO:0030036;GO:0046872;GO:0048041;GO:0000166;GO:0004672;GO:0004672;GO:0004672;GO:0004674;GO:0004674;GO:…	K08842	EC:2.7.12.1	COG0515	T	testis associated actin remodelling kinase 2[Source:HGNC Symbol;Acc:HGNC:11732]	10420	Q96S53
ENSG00000177169	3540.76	4847.36	2234.15	0.460899	-1.11748	1.34951e-10	1.16393e-08	12	131894622	131923150	+	7620	ULK1	GO:0000045;GO:0000166;GO:0000407;GO:0000407;GO:0004672;GO:0004672;GO:0004674;GO:0004674;GO:0004674;GO:0004674;GO:0004674;GO:0004674;GO:0004674;GO:0005515;GO:0005515;GO:0005515;GO:0005515;GO:0005515;GO:0005524;GO:0005524;GO:0005524;GO:0005737;GO:0005741;GO:0005776;GO:0005776;GO:0005789;GO:0005829;GO:0005829;GO:0005829;GO:0006468;GO:0006468;GO:0006468;GO:0006914;GO:0007165;GO:0007165;GO:0007409;GO:…	K21357	EC:2.7.11.1	COG0515	T	unc-51 like autophagy activating kinase 1[Source:HGNC Symbol;Acc:HGNC:12558]	8408	O75385
ENSG00000164211	1782.72	2440.21	1125.23	0.461119	-1.11679	1.76446e-22	7.4446e-20	5	111496033	111512590	-	5684	STARD4	GO:0005737;GO:0006869;GO:0008289;GO:0008289;GO:0008289;GO:0010873;GO:0010879;GO:0015485;GO:0015485;GO:0015485;GO:0031410;GO:0032367;GO:0032367;GO:0032367;GO:0070508;GO:0070859;GO:0120020;GO:0015485;GO:0015485;GO:0032367;GO:0032367;GO:0015485;GO:0032367;GO:0005737;GO:0006869;GO:0008289;GO:0008289;GO:0008289;GO:0010873;GO:0010879;GO:0015485;GO:0015485;GO:0015485;GO:0031410;GO:0032367;GO:0032367;GO:…	-	-	NOG310389	-	StAR related lipid transfer domain containing 4[Source:HGNC Symbol;Acc:HGNC:18058]	134429	Q96DR4
ENSG00000153234	353.102	482.904	223.3	0.462412	-1.11275	4.85615e-05	0.00132302	2	156324437	156342348	-	3963	NR4A2	GO:0000122;GO:0000790;GO:0000977;GO:0000977;GO:0000978;GO:0000978;GO:0000981;GO:0001228;GO:0001228;GO:0001666;GO:0001764;GO:0001764;GO:0001975;GO:0003677;GO:0003677;GO:0003677;GO:0003677;GO:0003677;GO:0003700;GO:0003700;GO:0003707;GO:0003707;GO:0004879;GO:0004879;GO:0004879;GO:0004879;GO:0005515;GO:0005634;GO:0005634;GO:0005634;GO:0005634;GO:0005634;GO:0005634;GO:0005634;GO:0005654;GO:0005667;GO:…	K08558	-	NOG245120	-	nuclear receptor subfamily 4 group A member 2[Source:HGNC Symbol;Acc:HGNC:7981]	4929	P43354;F1D8N6;Q53EL4
ENSG00000010310	163.589	223.698	103.48	0.462591	-1.11219	1.64717e-06	6.50271e-05	19	45668221	45683722	+	5069	GIPR	GO:0004888;GO:0004888;GO:0004930;GO:0004930;GO:0004930;GO:0007165;GO:0007166;GO:0007166;GO:0007186;GO:0007186;GO:0007186;GO:0016020;GO:0016020;GO:0016020;GO:0016021;GO:0016021;GO:0016021;GO:0016519;GO:0016519;GO:0038192;GO:0002029;GO:0004888;GO:0004888;GO:0004888;GO:0004930;GO:0004930;GO:0004930;GO:0005515;GO:0005623;GO:0005886;GO:0005886;GO:0005886;GO:0005886;GO:0006091;GO:0007165;GO:0007166;GO:…	K04580	-	NOG239460	-	gastric inhibitory polypeptide receptor [Source:HGNCSymbol;Acc:HGNC:4271]	2696	P48546
ENSG00000133805	65.6471	89.7544	41.5398	0.462816	-1.11149	0.00158134	0.0236572	11	10308313	10507579	+	6793	AMPD3	GO:0003876;GO:0003876;GO:0032264;GO:0032264;GO:0003876;GO:0003876;GO:0003876;GO:0003876;GO:0003876;GO:0005515;GO:0005576;GO:0005829;GO:0005829;GO:0006188;GO:0006196;GO:0009117;GO:0009168;GO:0009168;GO:0016787;GO:0019239;GO:0019239;GO:0032264;GO:0032264;GO:0032264;GO:0034774;GO:0043101;GO:0043312;GO:0046033;GO:0046872;GO:1904813;GO:0003876;GO:0003876;GO:0003876;GO:0003876;GO:0003876;GO:0003876;GO:…	K01490	EC:3.5.4.6	COG1816	F	adenosine monophosphate deaminase 3 [Source:HGNCSymbol;Acc:HGNC:470]	272	Q01432
ENSG00000164142	640.914	875.148	406.68	0.464698	-1.10563	1.00003e-12	1.17388e-10	4	151409176	151670503	+	11843	FAM160A1	-	-	-	NOG318159	-	family with sequence similarity 160 member A1[Source:HGNC Symbol;Acc:HGNC:34237]	729830	Q05DH4
ENSG00000052802	796.864	1087.51	506.214	0.465478	-1.10322	1.93139e-07	9.27723e-06	4	165327667	165343164	+	2852	MSMO1	GO:0005506;GO:0005506;GO:0008610;GO:0008610;GO:0016020;GO:0016021;GO:0016491;GO:0016491;GO:0055114;GO:0055114;GO:0000254;GO:0000254;GO:0000254;GO:0000254;GO:0005506;GO:0005506;GO:0005783;GO:0005783;GO:0005789;GO:0005789;GO:0005789;GO:0005886;GO:0006629;GO:0006631;GO:0006694;GO:0006695;GO:0008202;GO:0008202;GO:0008610;GO:0008610;GO:0016020;GO:0016020;GO:0016021;GO:0016021;GO:0016126;GO:0016126;GO:…	K07750	EC:1.14.18.9	COG3000	I	methylsterol monooxygenase 1 [Source:HGNCSymbol;Acc:HGNC:10545]	6307	Q15800
ENSG00000107249	587.943	801.884	374.001	0.466403	-1.10035	5.68278e-14	7.41755e-12	9	3824127	4348392	-	11978	GLIS3	GO:0000122;GO:0000977;GO:0000981;GO:0003676;GO:0003676;GO:0003677;GO:0005634;GO:0005634;GO:0005634;GO:0005634;GO:0006357;GO:0006357;GO:0006366;GO:0045944;GO:0045944;GO:0046872;GO:0000122;GO:0000977;GO:0000981;GO:0003676;GO:0003676;GO:0003677;GO:0005634;GO:0005634;GO:0005634;GO:0005634;GO:0006357;GO:0006357;GO:0006366;GO:0045944;GO:0045944;GO:0046872;GO:0005634;GO:0005634;GO:0006357;GO:0006357;GO:…	K09232	-	COG5048	R	GLIS family zinc finger 3 [Source:HGNCSymbol;Acc:HGNC:28510]	169792	Q8NEA6;A0A0S2Z689
ENSG00000167705	452.743	617.331	288.155	0.466775	-1.0992	4.23081e-12	4.58661e-10	17	1646145	1649866	-	1892	RILP	GO:0046983;GO:0046983;GO:0005515;GO:0005515;GO:0005515;GO:0005737;GO:0005764;GO:0005764;GO:0005764;GO:0005765;GO:0005765;GO:0005768;GO:0005770;GO:0005770;GO:0005829;GO:0008333;GO:0010796;GO:0015031;GO:0016020;GO:0017137;GO:0017137;GO:0019886;GO:0030670;GO:0031267;GO:0031267;GO:0031410;GO:0031902;GO:0032509;GO:0032991;GO:0042177;GO:0045022;GO:0045022;GO:0045732;GO:0046983;GO:0046983;GO:0051959;GO:…	K13883	-	NOG28812	-	Rab interacting lysosomal protein [Source:HGNCSymbol;Acc:HGNC:30266]	83547	Q96NA2
ENSG00000183696	1489.07	2028.42	949.725	0.46821	-1.09477	1.20482e-20	3.35866e-18	7	48088628	48108736	+	4580	UPP1	GO:0003824;GO:0003824;GO:0005654;GO:0009116;GO:0009116;GO:0016763;GO:0016763;GO:0003824;GO:0003824;GO:0004850;GO:0004850;GO:0004850;GO:0004850;GO:0004850;GO:0005654;GO:0005737;GO:0005737;GO:0005829;GO:0006139;GO:0006218;GO:0006220;GO:0009116;GO:0009116;GO:0009166;GO:0009166;GO:0016740;GO:0016757;GO:0016763;GO:0016763;GO:0042149;GO:0043097;GO:0044206;GO:0046108;GO:0046135;GO:0003824;GO:0004850;GO:…	K00757	EC:2.4.2.3	COG2820	F	uridine phosphorylase 1 [Source:HGNCSymbol;Acc:HGNC:12576]	7378	Q16831;B4DND0
ENSG00000113739	2257.57	3072.32	1442.82	0.469619	-1.09044	1.95078e-05	0.000597357	5	173314713	173329503	-	6128	STC2	GO:0005179;GO:0005179;GO:0005179;GO:0005576;GO:0005576;GO:0005576;GO:0005615;GO:0005615;GO:0005623;GO:0005783;GO:0005783;GO:0005788;GO:0005794;GO:0006874;GO:0006874;GO:0006874;GO:0006979;GO:0007566;GO:0010629;GO:0019899;GO:0020037;GO:0030968;GO:0033280;GO:0034976;GO:0040015;GO:0042803;GO:0043434;GO:0043687;GO:0044267;GO:0046697;GO:0046885;GO:0048471;GO:0055074;GO:0071456;GO:2001256;GO:0005179;GO:…	-	-	NOG44223	-	stanniocalcin 2 [Source:HGNC Symbol;Acc:HGNC:11374]"	8614	O76061;Q6FHC9
ENSG00000019549	300.511	408.814	192.209	0.470163	-1.08877	2.34774e-09	1.62891e-07	8	48917598	48921740	-	3281	SNAI2	GO:0000122;GO:0000122;GO:0000790;GO:0000790;GO:0000977;GO:0000977;GO:0000981;GO:0001227;GO:0001227;GO:0001227;GO:0001649;GO:0001837;GO:0001837;GO:0003180;GO:0003198;GO:0003198;GO:0003273;GO:0003273;GO:0003676;GO:0003676;GO:0003677;GO:0003677;GO:0003682;GO:0003700;GO:0005515;GO:0005634;GO:0005634;GO:0005634;GO:0005634;GO:0005654;GO:0005737;GO:0005737;GO:0006355;GO:0006929;GO:0006933;GO:0007219;GO:…	K05706	-	COG5048	R	snail family transcriptional repressor 2[Source:HGNC Symbol;Acc:HGNC:11094]	6591	O43623
ENSG00000169155	1047.25	1423.32	671.167	0.471549	-1.08452	1.95535e-05	0.000597357	9	126805006	126838210	+	7052	ZBTB43	GO:0000790;GO:0000981;GO:0003676;GO:0003676;GO:0003677;GO:0005515;GO:0005515;GO:0005634;GO:0006357;GO:0046872;GO:0005515;GO:0000790;GO:0000981;GO:0003676;GO:0003676;GO:0003677;GO:0005515;GO:0005515;GO:0005634;GO:0006357;GO:0046872;GO:0000790;GO:0000981;GO:0003676;GO:0003676;GO:0003677;GO:0005515;GO:0005515;GO:0005634;GO:0006357;GO:0046872;	K10514	-	COG5048	R	zinc finger and BTB domain containing 43[Source:HGNC Symbol;Acc:HGNC:17908]	23099	O43298
ENSG00000163803	47.0559	63.9334	30.1784	0.472028	-1.08306	0.00869926	0.0879561	2	28457145	28644142	+	8603	PLB1	GO:0004620;GO:0004620;GO:0001523;GO:0004620;GO:0004620;GO:0004620;GO:0004622;GO:0004622;GO:0004623;GO:0004623;GO:0004623;GO:0005886;GO:0005886;GO:0006629;GO:0006629;GO:0006629;GO:0006644;GO:0016020;GO:0016021;GO:0016042;GO:0016298;GO:0016298;GO:0016324;GO:0016787;GO:0016788;GO:0016788;GO:0031526;GO:0036151;GO:0042572;GO:0050253;GO:0050253;GO:0102567;GO:0102568;GO:2000344;GO:0001523;GO:0004620;GO:…	K14621	-	NOG311176	-	phospholipase B1 [Source:HGNCSymbol;Acc:HGNC:30041]	151056	Q6P1J6;B2RWP8
ENSG00000196517	2078.76	2823.77	1333.74	0.472326	-1.08214	2.80168e-22	1.12146e-19	1	43991500	44031467	-	5249	SLC6A9	GO:0003333;GO:0005283;GO:0005283;GO:0005328;GO:0005328;GO:0005887;GO:0005887;GO:0006836;GO:0006836;GO:0015293;GO:0016020;GO:0016020;GO:0016020;GO:0016021;GO:0016021;GO:0016021;GO:0055085;GO:1903825;GO:0003333;GO:0005283;GO:0005283;GO:0005328;GO:0005328;GO:0005887;GO:0005887;GO:0006836;GO:0006836;GO:0015293;GO:0016020;GO:0016020;GO:0016020;GO:0016021;GO:0016021;GO:0016021;GO:0055085;GO:1903825;GO:…	K05038	-	COG0733	P	solute carrier family 6 member 9 [Source:HGNCSymbol;Acc:HGNC:11056]	6536	P48067
ENSG00000074803	66.9797	90.9151	43.0443	0.473456	-1.0787	0.00189414	0.0272875	15	48178438	48304078	+	12838	SLC12A1	GO:0005623;GO:0005886;GO:0005886;GO:0006811;GO:0006811;GO:0006811;GO:0006811;GO:0006813;GO:0006814;GO:0006884;GO:0008511;GO:0008511;GO:0015081;GO:0015293;GO:0015377;GO:0015377;GO:0015378;GO:0015379;GO:0016020;GO:0016020;GO:0016020;GO:0016020;GO:0016021;GO:0016021;GO:0016021;GO:0016324;GO:0022857;GO:0022857;GO:0034220;GO:0035725;GO:0055064;GO:0055075;GO:0055078;GO:0055085;GO:0055085;GO:0070062;GO:…	K14425	-	COG0531	E	solute carrier family 12 member 1 [Source:HGNCSymbol;Acc:HGNC:10910]	6557	Q13621;Q8IUN5
ENSG00000169087	374.127	507.656	240.597	0.473937	-1.07723	1.75001e-10	1.49286e-08	3	122739999	122793831	-	5445	HSPBAP1	GO:0005515;GO:0005737;GO:0016706;GO:0055114;	K19375	-	NOG289303	-	HSPB1 associated protein 1 [Source:HGNCSymbol;Acc:HGNC:16389]	79663	Q96EW2;A8K045
ENSG00000105856	819	1111.17	526.83	0.474123	-1.07667	7.78949e-16	1.15811e-13	7	107168961	107202522	+	6344	HBP1	GO:0000122;GO:0000790;GO:0000978;GO:0000981;GO:0001227;GO:0003677;GO:0003723;GO:0003723;GO:0005515;GO:0005515;GO:0005634;GO:0005654;GO:0005654;GO:0006355;GO:0006355;GO:0007050;GO:0016055;GO:0016607;GO:0006355;GO:0006355;GO:0005654;GO:0006355;GO:0006355;GO:0016607;GO:0000122;GO:0000790;GO:0000978;GO:0000981;GO:0001227;GO:0003677;GO:0003723;GO:0003723;GO:0005515;GO:0005515;GO:0005634;GO:0005654;GO:…	K21644	-	NOG149693	S	HMG-box transcription factor 1 [Source:HGNCSymbol;Acc:HGNC:23200]	26959	O60381;A0A024R722
ENSG00000113742	580.253	786.458	374.049	0.475613	-1.07214	4.31001e-11	3.93471e-09	5	173888349	173961980	+	10444	CPEB4	GO:0000900;GO:0002931;GO:0002931;GO:0003676;GO:0003676;GO:0003723;GO:0003723;GO:0003730;GO:0003730;GO:0003730;GO:0005515;GO:0005634;GO:0005634;GO:0005634;GO:0005737;GO:0005737;GO:0005737;GO:0005783;GO:0005783;GO:0006412;GO:0006417;GO:0006417;GO:0008135;GO:0014069;GO:0014069;GO:0030054;GO:0030424;GO:0030425;GO:0030425;GO:0030426;GO:0035235;GO:0036294;GO:0042149;GO:0042995;GO:0043005;GO:0043022;GO:…	K02602	-	NOG240295	-	cytoplasmic polyadenylation element binding protein4 [Source:HGNC Symbol;Acc:HGNC:21747]	80315	Q17RY0
ENSG00000162496	358.781	486.116	231.446	0.476114	-1.07062	0.000202273	0.00429616	1	12567910	12618210	-	3515	DHRS3	GO:0000166;GO:0001523;GO:0001523;GO:0001523;GO:0003151;GO:0004745;GO:0004745;GO:0004745;GO:0004745;GO:0005789;GO:0005811;GO:0007601;GO:0009055;GO:0016020;GO:0016021;GO:0016491;GO:0016616;GO:0022900;GO:0030278;GO:0042572;GO:0042572;GO:0042572;GO:0042622;GO:0048385;GO:0048387;GO:0052650;GO:0052650;GO:0055114;GO:0060021;GO:0060349;GO:0060411;GO:0004745;GO:0004745;GO:0042572;GO:0042572;GO:0055114;	K11146	EC:1.1.1.300	COG1028	IQ	dehydrogenase/reductase 3 [Source:HGNCSymbol;Acc:HGNC:17693]	9249	O75911
ENSG00000135069	4655	6306.91	3003.08	0.476157	-1.07049	1.4569e-25	8.74754e-23	9	78297125	78330093	+	2206	PSAT1	GO:0003824;GO:0003824;GO:0004648;GO:0004648;GO:0004648;GO:0004648;GO:0005737;GO:0005829;GO:0005829;GO:0006564;GO:0006564;GO:0006564;GO:0006564;GO:0006564;GO:0008483;GO:0008615;GO:0008652;GO:0016740;GO:0070062;GO:0003824;GO:0003824;GO:0004648;GO:0004648;GO:0004648;GO:0004648;GO:0005737;GO:0005829;GO:0005829;GO:0006564;GO:0006564;GO:0006564;GO:0006564;GO:0006564;GO:0008483;GO:0008615;GO:0008652;GO:…	K00831	EC:2.6.1.52	COG1932	E	phosphoserine aminotransferase 1 [Source:HGNCSymbol;Acc:HGNC:19129]	29968	Q9Y617;A0A024R222
ENSG00000149150	285.08	386.128	184.031	0.476607	-1.06913	9.74364e-09	6.13338e-07	11	57484534	57515780	-	3526	SLC43A1	GO:0003333;GO:0005886;GO:0005887;GO:0006865;GO:0006865;GO:0015171;GO:0015175;GO:0015175;GO:0015179;GO:0015804;GO:0015804;GO:0016020;GO:0016021;GO:0055085;GO:0055085;GO:1902475;GO:0003333;GO:0005886;GO:0005887;GO:0006865;GO:0006865;GO:0015171;GO:0015175;GO:0015175;GO:0015179;GO:0015804;GO:0015804;GO:0016020;GO:0016021;GO:0055085;GO:0055085;GO:1902475;GO:0016020;GO:0016021;GO:0016020;GO:0016021;GO:…	K08228	-	NOG71084	R	solute carrier family 43 member 1 [Source:HGNCSymbol;Acc:HGNC:9225]	8501	O75387;A0A024R4Y3
ENSG00000069812	1443.2	1952.46	933.949	0.478344	-1.06388	2.06346e-19	5.03324e-17	1	6412418	6424670	-	5407	HES2	GO:0000122;GO:0000790;GO:0000977;GO:0000981;GO:0001227;GO:0003677;GO:0003677;GO:0005634;GO:0005634;GO:0006355;GO:0008134;GO:0009952;GO:0030154;GO:0046983;GO:0046983;GO:0050767;GO:0000122;GO:0000790;GO:0000977;GO:0000981;GO:0001227;GO:0003677;GO:0003677;GO:0005634;GO:0005634;GO:0006355;GO:0008134;GO:0009952;GO:0030154;GO:0046983;GO:0046983;GO:0050767;GO:0000122;GO:0000122;GO:0000790;GO:0000977;GO:…	K09087	-	NOG259850	-	hes family bHLH transcription factor 2 [Source:HGNCSymbol;Acc:HGNC:16005]	54626	Q9Y543
ENSG00000059728	226.63	306.128	147.132	0.480624	-1.05702	1.98787e-07	9.49009e-06	2	69897688	69942945	+	6351	MXD1	GO:0000122;GO:0000122;GO:0005654;GO:0005739;GO:0005829;GO:0046983;GO:0046983;GO:0000122;GO:0000122;GO:0000122;GO:0000122;GO:0000790;GO:0000790;GO:0000978;GO:0000981;GO:0001227;GO:0003677;GO:0003700;GO:0003714;GO:0005515;GO:0005634;GO:0005634;GO:0005654;GO:0005739;GO:0005829;GO:0046983;GO:0046983;GO:0000122;GO:0000122;GO:0000122;GO:0000122;GO:0000790;GO:0000790;GO:0000978;GO:0000981;GO:0001227;GO:…	K09114	-	NOG238408	-	MAX dimerization protein 1 [Source:HGNCSymbol;Acc:HGNC:6761]	4084	Q05195
ENSG00000116016	5283.02	7130.29	3435.74	0.48185	-1.05334	4.68274e-17	8.40255e-15	2	46293667	46386697	+	7291	EPAS1	GO:0003700;GO:0003700;GO:0005634;GO:0005634;GO:0005634;GO:0005667;GO:0005667;GO:0005737;GO:0005737;GO:0006355;GO:0006355;GO:0046983;GO:0046983;GO:0000790;GO:0000978;GO:0000981;GO:0000981;GO:0000987;GO:0001228;GO:0001525;GO:0001525;GO:0001666;GO:0001666;GO:0001892;GO:0001974;GO:0002027;GO:0003677;GO:0003677;GO:0003677;GO:0003700;GO:0003700;GO:0003700;GO:0005515;GO:0005515;GO:0005515;GO:0005515;GO:…	K09095	-	NOG289264	-	endothelial PAS domain protein 1 [Source:HGNCSymbol;Acc:HGNC:3374]	2034	Q99814;B3KW07
ENSG00000166676	477.459	643.847	311.072	0.483145	-1.04947	0.00100346	0.0165593	16	10760919	10818794	-	5772	TVP23A	GO:0009306;GO:0016020;GO:0016021;GO:0016021;GO:0016192;GO:0030173;GO:0009306;GO:0016020;GO:0016021;GO:0016021;GO:0016192;GO:0030173;GO:0009306;GO:0016020;GO:0016021;GO:0016021;GO:0016021;GO:0016192;GO:0030173;GO:0009306;GO:0016020;GO:0016021;GO:0016021;GO:0016021;GO:0016192;GO:0030173;GO:0016020;GO:0016021;GO:0016021;GO:0016021;GO:0016020;GO:0016021;GO:0016021;GO:0016021;GO:0016020;GO:0016021;GO:…	-	-	NOG280675	-	trans-golgi network vesicle protein 23 homolog A[Source:HGNC Symbol;Acc:HGNC:20398]	780776	A6NH52
ENSG00000106070	1473.96	1987.11	960.803	0.483518	-1.04836	6.14511e-19	1.43181e-16	7	50590063	50793462	-	9795	GRB10	GO:0005070;GO:0005070;GO:0005070;GO:0005070;GO:0005158;GO:0005158;GO:0005158;GO:0005158;GO:0005515;GO:0005515;GO:0005515;GO:0005737;GO:0005737;GO:0005829;GO:0005886;GO:0007165;GO:0007165;GO:0007411;GO:0008286;GO:0030178;GO:0030178;GO:0030949;GO:0032991;GO:0046325;GO:0046627;GO:0046627;GO:0046627;GO:0046627;GO:0120162;GO:0005070;GO:0005070;GO:0005070;GO:0005070;GO:0005158;GO:0005158;GO:0005158;GO:…	K20064	-	NOG307156	-	growth factor receptor bound protein 10 [Source:HGNCSymbol;Acc:HGNC:4564]	2887	Q13322
ENSG00000167103	262.324	353.623	171.026	0.483639	-1.048	6.8927e-07	2.96424e-05	9	127920881	127930785	-	3327	PIP5KL1	GO:0000166;GO:0001933;GO:0005524;GO:0005737;GO:0005829;GO:0010917;GO:0016020;GO:0016301;GO:0016307;GO:0016307;GO:0016308;GO:0016308;GO:0016310;GO:0016740;GO:0030336;GO:0042995;GO:0043065;GO:0046488;GO:0046488;GO:0046854;GO:0000166;GO:0001933;GO:0005524;GO:0005737;GO:0005829;GO:0010917;GO:0016020;GO:0016301;GO:0016307;GO:0016307;GO:0016308;GO:0016310;GO:0016740;GO:0030336;GO:0043065;GO:0046488;GO:…	K13712	EC:2.7.1.68	COG5253	T	phosphatidylinositol-4-phosphate 5-kinase like 1[Source:HGNC Symbol;Acc:HGNC:28711]	138429	Q5T9C9
ENSG00000134324	2361.03	3182.63	1539.43	0.483698	-1.04782	1.20884e-21	4.38865e-19	2	11677595	11827409	+	11861	LPIN1	GO:0003713;GO:0005634;GO:0005634;GO:0005635;GO:0005654;GO:0005737;GO:0005741;GO:0005783;GO:0005789;GO:0005789;GO:0005829;GO:0006357;GO:0006357;GO:0006629;GO:0006631;GO:0006642;GO:0006646;GO:0006656;GO:0007077;GO:0008195;GO:0008195;GO:0008195;GO:0008195;GO:0009062;GO:0009062;GO:0009062;GO:0009062;GO:0016020;GO:0016311;GO:0016787;GO:0019432;GO:0019432;GO:0019432;GO:0019432;GO:0031100;GO:0031965;GO:…	K15728	EC:3.1.3.4	COG5083	R	lipin 1 [Source:HGNC Symbol;Acc:HGNC:13345]"	23175	Q14693
ENSG00000141682	618.107	832.916	403.299	0.484201	-1.04632	8.27528e-12	8.61236e-10	18	59899996	59904305	+	2186	PMAIP1	GO:0001836;GO:0001836;GO:0001844;GO:0005515;GO:0005515;GO:0005515;GO:0005634;GO:0005739;GO:0005739;GO:0005739;GO:0005741;GO:0005829;GO:0005829;GO:0005829;GO:0006915;GO:0006915;GO:0006915;GO:0006915;GO:0006919;GO:0006919;GO:0006974;GO:0006974;GO:0010498;GO:0010907;GO:0010917;GO:0042149;GO:0042981;GO:0043029;GO:0043065;GO:0043280;GO:0043331;GO:0043517;GO:0046902;GO:0051607;GO:0071456;GO:0072332;GO:…	K10131	-	NOG119326	-	phorbol-12-myristate-13-acetate-induced protein 1[Source:HGNC Symbol;Acc:HGNC:9108]	5366	Q13794;A0A0S2Z490
ENSG00000171365	538.548	724.86	352.236	0.485936	-1.04116	3.27925e-12	3.6051e-10	X	49922596	50099235	+	11457	CLCN5	GO:0000139;GO:0000166;GO:0005247;GO:0005247;GO:0005247;GO:0005254;GO:0005515;GO:0005524;GO:0005765;GO:0005768;GO:0005768;GO:0005769;GO:0005794;GO:0005794;GO:0005794;GO:0005829;GO:0005886;GO:0005886;GO:0005886;GO:0005887;GO:0005887;GO:0006811;GO:0006821;GO:0006821;GO:0007588;GO:0008021;GO:0010008;GO:0010008;GO:0015297;GO:0015299;GO:0016020;GO:0016020;GO:0016020;GO:0016021;GO:0031404;GO:0034220;GO:…	K05012	-	COG0038	P	chloride voltage-gated channel 5 [Source:HGNCSymbol;Acc:HGNC:2023]	1184	P51795;A8K4H5
ENSG00000143494	339.36	456.747	221.974	0.48599	-1.041	2.62955e-09	1.79257e-07	1	212950520	212992037	+	9086	VASH2	GO:0001938;GO:0003779;GO:0004180;GO:0004181;GO:0005515;GO:0005576;GO:0005737;GO:0005737;GO:0005737;GO:0005737;GO:0005737;GO:0005856;GO:0006508;GO:0008017;GO:0008233;GO:0016787;GO:0045765;GO:0045765;GO:0045765;GO:0045766;GO:0061564;GO:0140253;GO:0001938;GO:0003779;GO:0004180;GO:0004181;GO:0005515;GO:0005576;GO:0005737;GO:0005737;GO:0005737;GO:0005737;GO:0005737;GO:0005856;GO:0006508;GO:0008017;GO:…	K23355	EC:3.4.17.17	NOG41266	S	vasohibin 2 [Source:HGNC Symbol;Acc:HGNC:25723]"	79805	Q86V25;A8K4K8
ENSG00000130787	1303.39	1753.71	853.076	0.48644	-1.03967	5.42347e-18	1.09956e-15	12	122834453	122862961	+	7072	HIP1R	GO:0003779;GO:0003779;GO:0003779;GO:0003779;GO:0005515;GO:0005515;GO:0005543;GO:0005543;GO:0005546;GO:0005547;GO:0005737;GO:0005739;GO:0005829;GO:0005829;GO:0005856;GO:0005886;GO:0005905;GO:0005905;GO:0005905;GO:0005938;GO:0006897;GO:0006897;GO:0006897;GO:0006898;GO:0006898;GO:0006915;GO:0006915;GO:0006919;GO:0006919;GO:0007015;GO:0012505;GO:0014069;GO:0016020;GO:0016020;GO:0016324;GO:0017124;GO:…	K20040	-	NOG280957	-	huntingtin interacting protein 1 related[Source:HGNC Symbol;Acc:HGNC:18415]	9026	O75146
ENSG00000163565	163.332	219.695	106.97	0.486901	-1.0383	7.49898e-06	0.000257856	1	158999968	159055155	+	5294	IFI16	GO:0002218;GO:0002218;GO:0035458;GO:0035458;GO:0002218;GO:0002218;GO:0035458;GO:0035458;GO:0002218;GO:0002218;GO:0035458;GO:0035458;GO:0000122;GO:0000122;GO:0000978;GO:0001227;GO:0001819;GO:0002218;GO:0002218;GO:0002218;GO:0002218;GO:0002376;GO:0003677;GO:0003690;GO:0003690;GO:0003723;GO:0005515;GO:0005515;GO:0005634;GO:0005634;GO:0005654;GO:0005654;GO:0005730;GO:0005730;GO:0005730;GO:0005737;GO:…	K20914	-	NOG81691	S	interferon gamma inducible protein 16 [Source:HGNCSymbol;Acc:HGNC:5395]	3428	Q16666
ENSG00000122912	881.342	1185.11	577.574	0.487359	-1.03694	3.35711e-07	1.53689e-05	10	68477998	68527523	-	7865	SLC25A16	GO:0005739;GO:0005739;GO:0005743;GO:0005743;GO:0005743;GO:0005743;GO:0006839;GO:0009108;GO:0015291;GO:0015297;GO:0016020;GO:0016021;GO:0022857;GO:0022857;GO:0055085;GO:0055085;GO:0016020;GO:0016021;	K15084	-	NOG274055	-	solute carrier family 25 member 16 [Source:HGNCSymbol;Acc:HGNC:10986]	8034	P16260
ENSG00000107742	265.424	356.769	174.079	0.487932	-1.03525	5.97214e-08	3.24456e-06	10	72059034	72089032	-	6411	SPOCK2	GO:0005509;GO:0005509;GO:0005509;GO:0005509;GO:0005515;GO:0005518;GO:0005576;GO:0005615;GO:0007416;GO:0008191;GO:0010951;GO:0030198;GO:0031012;GO:0045595;GO:0048856;GO:0050840;GO:2000147;GO:0005509;GO:0005509;GO:0005509;GO:0005509;GO:0005515;GO:0005518;GO:0005539;GO:0005576;GO:0005615;GO:0007416;GO:0008191;GO:0010811;GO:0010951;GO:0019800;GO:0030198;GO:0030198;GO:0031012;GO:0045595;GO:0048856;GO:…	K08136	-	NOG244822	-	SPARC (osteonectin), cwcv and kazal like domainsproteoglycan 2 [Source:HGNC Symbol;Acc:HGNC:13564]	9806	Q92563
ENSG00000130164	3336.2	4483.92	2188.48	0.488074	-1.03483	1.80966e-08	1.0824e-06	19	11089462	11133820	+	7622	LDLR	GO:0005509;GO:0005509;GO:0005515;GO:0016020;GO:0016021;GO:0001540;GO:0001540;GO:0001618;GO:0002020;GO:0005041;GO:0005041;GO:0005041;GO:0005041;GO:0005509;GO:0005509;GO:0005515;GO:0005515;GO:0005515;GO:0005515;GO:0005623;GO:0005623;GO:0005764;GO:0005764;GO:0005764;GO:0005768;GO:0005768;GO:0005769;GO:0005769;GO:0005769;GO:0005770;GO:0005770;GO:0005794;GO:0005886;GO:0005886;GO:0005886;GO:0005887;GO:…	K12473	-	NOG255913	-	low density lipoprotein receptor [Source:HGNCSymbol;Acc:HGNC:6547]	3949	P01130;A0A024R7D5
ENSG00000159214	237.656	319.41	155.901	0.488092	-1.03477	1.97645e-07	9.4645e-06	1	43991359	43996528	+	3563	CCDC24	GO:0001835;GO:0005515;	-	-	NOG46835	S	coiled-coil domain containing 24 [Source:HGNCSymbol;Acc:HGNC:28688]	149473	Q8N4L8
ENSG00000188833	33.977	45.6638	22.2903	0.48814	-1.03463	0.0338662	0.227881	9	137434364	137441816	-	2836	ENTPD8	GO:0000166;GO:0005524;GO:0005886;GO:0005886;GO:0009124;GO:0009133;GO:0016020;GO:0016020;GO:0016021;GO:0016787;GO:0016787;GO:0016787;GO:0017110;GO:0017111;GO:0034656;GO:0046872;GO:0102485;GO:0102486;GO:0102487;GO:0102488;GO:0102489;GO:0102490;GO:0102491;GO:0000166;GO:0005524;GO:0005886;GO:0005886;GO:0016020;GO:0016021;GO:0016787;GO:0016787;GO:0016787;GO:0034656;GO:0046872;GO:0102485;GO:0102486;GO:…	K01510	EC:3.6.1.5	COG5371	GO	ectonucleoside triphosphate diphosphohydrolase 8[Source:HGNC Symbol;Acc:HGNC:24860]	377841	Q5MY95
ENSG00000141458	1746.66	2344.97	1148.35	0.48971	-1.03	3.99749e-14	5.33375e-12	18	23506184	23586506	-	9705	NPC1	GO:0016020;GO:0016021;GO:0016021;GO:0016021;GO:0016020;GO:0016021;GO:0016021;GO:0016021;GO:0016020;GO:0016021;GO:0016020;GO:0016021;GO:0016021;GO:0016021;GO:0001618;GO:0004888;GO:0005319;GO:0005319;GO:0005515;GO:0005515;GO:0005576;GO:0005576;GO:0005635;GO:0005635;GO:0005764;GO:0005764;GO:0005764;GO:0005765;GO:0005765;GO:0005768;GO:0005768;GO:0005783;GO:0005794;GO:0005886;GO:0005887;GO:0006486;GO:…	K12385	-	NOG149152	S	NPC intracellular cholesterol transporter 1[Source:HGNC Symbol;Acc:HGNC:7897]	4864	O15118
ENSG00000073756	1036.85	1390.91	682.781	0.490886	-1.02654	0.000331707	0.00648906	1	186671791	186680423	-	5265	PTGS2	GO:0001516;GO:0001516;GO:0001516;GO:0001516;GO:0001516;GO:0001516;GO:0001525;GO:0004601;GO:0004601;GO:0004601;GO:0004666;GO:0004666;GO:0004666;GO:0004666;GO:0004666;GO:0005515;GO:0005637;GO:0005637;GO:0005640;GO:0005640;GO:0005737;GO:0005737;GO:0005737;GO:0005783;GO:0005783;GO:0005783;GO:0005788;GO:0005789;GO:0005789;GO:0005901;GO:0006629;GO:0006631;GO:0006633;GO:0006693;GO:0006954;GO:0006954;GO:…	K11987	EC:1.14.99.1	NOG39991	S	prostaglandin-endoperoxide synthase 2 [Source:HGNCSymbol;Acc:HGNC:9605]	5743	P35354
ENSG00000107242	40.2151	53.9477	26.4824	0.49089	-1.02653	0.0203617	0.161518	9	68705240	69009176	+	5092	PIP5K1B	GO:0000166;GO:0001931;GO:0005515;GO:0005524;GO:0005829;GO:0005829;GO:0006661;GO:0006661;GO:0012505;GO:0014066;GO:0016020;GO:0016301;GO:0016307;GO:0016307;GO:0016308;GO:0016308;GO:0016310;GO:0016740;GO:0046488;GO:0046488;GO:0046488;GO:0046854;GO:0000166;GO:0001931;GO:0005515;GO:0005524;GO:0005829;GO:0006661;GO:0012505;GO:0014066;GO:0016020;GO:0016301;GO:0016307;GO:0016307;GO:0016308;GO:0016310;GO:…	K00889	EC:2.7.1.68	COG5253	T	phosphatidylinositol-4-phosphate 5-kinase type 1beta [Source:HGNC Symbol;Acc:HGNC:8995]	8395	O14986;Q7KYT6
ENSG00000136010	482.841	647.381	318.301	0.491675	-1.02422	4.06224e-11	3.73033e-09	12	105019784	105107643	-	9493	ALDH1L2	GO:0003824;GO:0003824;GO:0004029;GO:0005654;GO:0005737;GO:0005737;GO:0005739;GO:0005739;GO:0005759;GO:0006730;GO:0006730;GO:0006730;GO:0009058;GO:0009058;GO:0009258;GO:0009258;GO:0016155;GO:0016155;GO:0016155;GO:0016155;GO:0016491;GO:0016491;GO:0016491;GO:0016620;GO:0016620;GO:0016742;GO:0016742;GO:0046655;GO:0055114;GO:0055114;GO:0055114;GO:0070062;GO:0003824;GO:0003824;GO:0005737;GO:0005737;GO:…	K00289	EC:1.5.1.6	COG1012	C	aldehyde dehydrogenase 1 family member L2[Source:HGNC Symbol;Acc:HGNC:26777]	160428	Q3SY69;B4DTU7
ENSG00000197181	92.7849	124.396	61.1743	0.491772	-1.02394	0.000627953	0.0110768	8	22275316	22357568	+	5737	PIWIL2	GO:0000966;GO:0000966;GO:0003676;GO:0003676;GO:0003723;GO:0003729;GO:0004518;GO:0004519;GO:0004521;GO:0004521;GO:0005515;GO:0005515;GO:0005634;GO:0005634;GO:0005737;GO:0005737;GO:0006417;GO:0007275;GO:0007283;GO:0007283;GO:0010370;GO:0010529;GO:0010529;GO:0016787;GO:0030154;GO:0030718;GO:0030718;GO:0031047;GO:0031047;GO:0033391;GO:0033391;GO:0034584;GO:0034584;GO:0034587;GO:0034587;GO:0042754;GO:…	K02156	-	NOG286051	-	piwi like RNA-mediated gene silencing 2 [Source:HGNCSymbol;Acc:HGNC:17644]	55124	Q8TC59;W0HK13
ENSG00000162066	282.639	378.86	186.417	0.492047	-1.02313	4.47351e-08	2.51209e-06	16	2520357	2531422	+	4366	AMDHD2	GO:0016787;GO:0016787;GO:0016810;GO:0016810;GO:0005515;GO:0005634;GO:0005829;GO:0005975;GO:0006044;GO:0006044;GO:0006046;GO:0006048;GO:0008448;GO:0008448;GO:0008448;GO:0008448;GO:0008448;GO:0016787;GO:0016787;GO:0016787;GO:0016810;GO:0016810;GO:0019262;GO:0046872;GO:0047419;GO:0005515;GO:0005634;GO:0005829;GO:0005975;GO:0006044;GO:0006044;GO:0006046;GO:0006048;GO:0008448;GO:0008448;GO:0008448;GO:…	K01443	EC:3.5.1.25	COG1820	G	amidohydrolase domain containing 2 [Source:HGNCSymbol;Acc:HGNC:24262]	51005	Q9Y303
ENSG00000131389	4035.59	5407.84	2663.35	0.492498	-1.02181	1.37602e-22	5.96697e-20	3	14402576	14489349	+	8254	SLC6A6	GO:0005328;GO:0005328;GO:0005368;GO:0005369;GO:0005369;GO:0005887;GO:0005887;GO:0006836;GO:0006836;GO:0015293;GO:0015734;GO:0016020;GO:0016020;GO:0016020;GO:0016021;GO:0016021;GO:0016021;GO:0050804;GO:0055085;GO:0098982;GO:0099055;GO:0005328;GO:0005369;GO:0005887;GO:0006836;GO:0015293;GO:0015734;GO:0016020;GO:0016020;GO:0016021;GO:0016021;GO:0055085;GO:0003333;GO:0005328;GO:0005328;GO:0005332;GO:…	K05039	-	COG0733	P	solute carrier family 6 member 6 [Source:HGNCSymbol;Acc:HGNC:11052]	6533	P31641;B4E140;Q59GD7
ENSG00000128342	672.19	900.434	443.945	0.493034	-1.02024	1.70509e-06	6.70482e-05	22	30240453	30246759	-	3871	LIF	GO:0001974;GO:0005102;GO:0005125;GO:0005125;GO:0005125;GO:0005125;GO:0005125;GO:0005125;GO:0005125;GO:0005146;GO:0005146;GO:0005146;GO:0005146;GO:0005146;GO:0005515;GO:0005576;GO:0005576;GO:0005576;GO:0005576;GO:0005615;GO:0005615;GO:0005615;GO:0005829;GO:0006955;GO:0006955;GO:0007260;GO:0007275;GO:0007566;GO:0008083;GO:0008083;GO:0008083;GO:0008083;GO:0008083;GO:0008284;GO:0008284;GO:0008284;GO:…	K05419	-	NOG45686	-	LIF interleukin 6 family cytokine [Source:HGNCSymbol;Acc:HGNC:6596]	3976	P15018
ENSG00000044574	27113.5	36258.1	17968.9	0.495584	-1.0128	3.15486e-21	1.02605e-18	9	125234853	125241343	-	3921	HSPA5	GO:0000166;GO:0001554;GO:0005509;GO:0005515;GO:0005515;GO:0005524;GO:0005524;GO:0005634;GO:0005634;GO:0005737;GO:0005737;GO:0005737;GO:0005739;GO:0005739;GO:0005783;GO:0005783;GO:0005783;GO:0005783;GO:0005788;GO:0005788;GO:0005788;GO:0005788;GO:0005789;GO:0005789;GO:0005790;GO:0005793;GO:0005793;GO:0005829;GO:0005886;GO:0005925;GO:0006983;GO:0006986;GO:0008180;GO:0009314;GO:0009986;GO:0010976;GO:…	K09490	-	COG0443	O	heat shock protein family A (Hsp70) member 5[Source:HGNC Symbol;Acc:HGNC:5238]	3309	P11021;V9HWB4
ENSG00000137193	1416.2	1893.75	938.654	0.49566	-1.01258	6.32605e-10	4.9378e-08	6	37170152	37175428	+	3030	PIM1	GO:0000166;GO:0004672;GO:0004672;GO:0004674;GO:0004674;GO:0004674;GO:0004674;GO:0004674;GO:0005515;GO:0005524;GO:0005524;GO:0005524;GO:0005524;GO:0005634;GO:0005634;GO:0005654;GO:0005730;GO:0005737;GO:0005737;GO:0005737;GO:0005829;GO:0005886;GO:0006468;GO:0006468;GO:0006468;GO:0006468;GO:0006915;GO:0007049;GO:0007275;GO:0008134;GO:0016020;GO:0016301;GO:0016310;GO:0016740;GO:0019221;GO:0022898;GO:…	K04702	EC:2.7.11.1	COG0515	T	Pim-1 proto-oncogene, serine/threonine kinase[Source:HGNC Symbol;Acc:HGNC:8986]	5292	P11309;A0A024RD25
ENSG00000095397	1497.88	2001.69	994.067	0.496614	-1.0098	6.53674e-18	1.30827e-15	9	114402080	114505473	-	5704	WHRN	GO:0001895;GO:0001895;GO:0001917;GO:0001917;GO:0002141;GO:0002141;GO:0002142;GO:0002142;GO:0005515;GO:0005515;GO:0005737;GO:0005737;GO:0005886;GO:0007605;GO:0007605;GO:0007605;GO:0007605;GO:0007605;GO:0030054;GO:0030426;GO:0032391;GO:0032391;GO:0032420;GO:0032420;GO:0032426;GO:0032426;GO:0042995;GO:0043025;GO:0045184;GO:0045202;GO:0050910;GO:0050953;GO:0050953;GO:0050953;GO:0060088;GO:0060119;GO:…	K21879	-	NOG291372	-	whirlin [Source:HGNC Symbol;Acc:HGNC:16361]"	25861	Q9P202;B9EGE6
ENSG00000174705	589.215	787.379	391.05	0.496648	-1.0097	0.000216663	0.00456453	5	172325000	172454525	-	8244	SH3PXD2B	GO:0001654;GO:0001654;GO:0005515;GO:0007507;GO:0007507;GO:0035091;GO:0035091;GO:0060348;GO:0060348;GO:0071800;GO:0071800;GO:0001654;GO:0001654;GO:0005515;GO:0007507;GO:0007507;GO:0035091;GO:0035091;GO:0060348;GO:0060348;GO:0071800;GO:0071800;GO:0001654;GO:0001654;GO:0007507;GO:0007507;GO:0060348;GO:0060348;GO:0071800;GO:0071800;GO:0001501;GO:0001501;GO:0001654;GO:0001654;GO:0001654;GO:0001654;GO:…	-	-	NOG148927	S	SH3 and PX domains 2B [Source:HGNCSymbol;Acc:HGNC:29242]	285590	A1X283
ENSG00000148158	438.117	585.408	290.826	0.496793	-1.00928	2.76604e-10	2.32154e-08	9	112750760	112881671	+	11656	SNX30	GO:0005515;GO:0015031;GO:0035091;GO:0035091;	K17921	-	COG5391	U	sorting nexin family member 30 [Source:HGNCSymbol;Acc:HGNC:23685]	401548	Q5VWJ9
ENSG00000188211	2378.19	3177.49	1578.9	0.496901	-1.00897	5.24002e-09	3.46618e-07	11	17351800	17377341	+	6364	NCR3LG1	GO:0005515;GO:0005886;GO:0005886;GO:0016020;GO:0016021;GO:0050776;GO:0005515;GO:0005886;GO:0005886;GO:0016020;GO:0016021;GO:0050776;	K16349	-	NOG135826	S	natural killer cell cytotoxicity receptor 3 ligand 1[Source:HGNC Symbol;Acc:HGNC:42400]	374383	Q68D85
ENSG00000168003	7749.58	10353.2	5145.96	0.497042	-1.00856	2.49666e-24	1.34398e-21	11	62856102	62888875	+	5178	SLC3A2	GO:0003723;GO:0003725;GO:0003824;GO:0003824;GO:0005432;GO:0005515;GO:0005515;GO:0005515;GO:0005654;GO:0005764;GO:0005765;GO:0005829;GO:0005886;GO:0005886;GO:0005886;GO:0005975;GO:0005975;GO:0006816;GO:0006865;GO:0006865;GO:0006865;GO:0006865;GO:0009986;GO:0015175;GO:0015827;GO:0016020;GO:0016021;GO:0016324;GO:0030054;GO:0035725;GO:0042470;GO:0043330;GO:0045296;GO:0050900;GO:0070062;GO:1902475;GO:…	K06519	-	COG0366	G	solute carrier family 3 member 2 [Source:HGNCSymbol;Acc:HGNC:11026]	6520	P08195
ENSG00000106617	605.951	809.358	402.545	0.497363	-1.00763	3.17963e-12	3.52037e-10	7	151556124	151877125	-	16427	PRKAG2	GO:0000166;GO:0004862;GO:0005524;GO:0005524;GO:0005615;GO:0005654;GO:0005829;GO:0005977;GO:0006110;GO:0006468;GO:0006469;GO:0006629;GO:0006631;GO:0006633;GO:0006754;GO:0006853;GO:0007050;GO:0008603;GO:0008607;GO:0010800;GO:0016126;GO:0016236;GO:0016241;GO:0019217;GO:0019901;GO:0030295;GO:0031588;GO:0032147;GO:0032559;GO:0032559;GO:0035556;GO:0042304;GO:0043531;GO:0045860;GO:0046320;GO:0046324;GO:…	K07200	-	COG0517	R	protein kinase AMP-activated non-catalytic subunitgamma 2 [Source:HGNC Symbol;Acc:HGNC:9386]	51422	Q9UGJ0;A0A090N8Q6
ENSG00000242802	1206.03	1610.39	801.67	0.497812	-1.00633	1.71988e-16	2.91837e-14	7	4775615	4794397	+	8398	AP5Z1	GO:0044599;GO:0000724;GO:0005515;GO:0005634;GO:0005654;GO:0005737;GO:0006281;GO:0006974;GO:0015031;GO:0016197;GO:0016607;GO:0030119;GO:0044599;GO:0044599;GO:0044599;GO:0044599;GO:0000724;GO:0005515;GO:0005634;GO:0005654;GO:0005737;GO:0006281;GO:0006974;GO:0015031;GO:0016197;GO:0016607;GO:0030119;GO:0044599;GO:0044599;GO:0044599;GO:0044599;GO:0044599;GO:0044599;GO:0044599;	K19025	-	NOG26605	G	adaptor related protein complex 5 subunit zeta 1[Source:HGNC Symbol;Acc:HGNC:22197]	9907	O43299

## Sheet: down
id	baseMean	baseMean_OA	baseMean_CK	foldChange(CK/OA)(CK/OA)	log2FoldChange	pval	padj	Chromosome	Start Site	End Site	Direction	Length	Name	GO	KEGG	EC	eggNOG	eggNOG_Class	Description	NCBI_GI	UniProtID
ENSG00000171385	18.8915	2.83693	34.9462	12.3183	3.62273	3.05905e-06	0.000113163	1	111770662	111989155	-	7863	KCND3	GO:0005216;GO:0005216;GO:0005244;GO:0005249;GO:0005249;GO:0005249;GO:0005250;GO:0005250;GO:0005250;GO:0005267;GO:0005515;GO:0005515;GO:0005886;GO:0005886;GO:0006811;GO:0006811;GO:0006811;GO:0006813;GO:0006813;GO:0006813;GO:0006813;GO:0008076;GO:0008076;GO:0008076;GO:0008076;GO:0008076;GO:0016020;GO:0016020;GO:0016020;GO:0016021;GO:0016021;GO:0030425;GO:0030425;GO:0034765;GO:0042383;GO:0042995;GO:…	K04893	-	COG1226	P	potassium voltage-gated channel subfamily D member 3[Source:HGNC Symbol;Acc:HGNC:6239]	3752	Q9UK17
ENSG00000126838	23.6	4.28632	42.9137	10.0118	3.32363	0.0129714	0.11789	12	9148840	9208395	-	6252	PZP	GO:0002020;GO:0004866;GO:0004866;GO:0004866;GO:0004866;GO:0004867;GO:0005576;GO:0005576;GO:0005576;GO:0005615;GO:0005615;GO:0005615;GO:0007565;GO:0010466;GO:0010951;GO:0030414;GO:0062023;GO:0070062;GO:0072562;	K23589	-	COG2373	R	PZP alpha-2-macroglobulin like [Source:HGNCSymbol;Acc:HGNC:9750]	5858	-
ENSG00000127129	55.8844	17.9033	93.8654	5.2429	2.39036	1.146e-06	4.70796e-05	1	41478775	41484683	-	1649	EDN2	GO:0001516;GO:0001516;GO:0001659;GO:0002690;GO:0003058;GO:0003099;GO:0003100;GO:0005179;GO:0005576;GO:0005576;GO:0005576;GO:0005576;GO:0005615;GO:0005623;GO:0007166;GO:0007186;GO:0007204;GO:0008284;GO:0010460;GO:0014824;GO:0014826;GO:0019221;GO:0019229;GO:0019229;GO:0019722;GO:0030593;GO:0031708;GO:0042116;GO:0042310;GO:0042310;GO:0042310;GO:0042310;GO:0045987;GO:0048016;GO:0048246;GO:0048286;GO:…	K16367	-	NOG43933	-	endothelin 2 [Source:HGNC Symbol;Acc:HGNC:3177]"	1907	P20800
ENSG00000186564	8.97572	2.87817	15.0733	5.23711	2.38877	0.0212283	0.166113	1	47438044	47440691	+	2648	FOXD2	GO:0000790;GO:0000981;GO:0000981;GO:0001228;GO:0003677;GO:0003700;GO:0003700;GO:0003700;GO:0005634;GO:0005634;GO:0006355;GO:0006355;GO:0006357;GO:0009653;GO:0030154;GO:0043565;GO:0043565;GO:0043565;GO:0045944;	K09397	-	COG5025	K	forkhead box D2 [Source:HGNC Symbol;Acc:HGNC:3803]"	2306	O60548
ENSG00000135960	7.46316	2.4294	12.4969	5.14403	2.3629	0.0389741	0.250072	2	108894471	108989372	-	4426	EDAR	GO:0004888;GO:0004888;GO:0005515;GO:0005515;GO:0005886;GO:0005886;GO:0006915;GO:0007275;GO:0008544;GO:0016020;GO:0016021;GO:0030154;GO:0033209;GO:0038023;GO:0043123;GO:0046330;GO:0001942;GO:0004888;GO:0004888;GO:0005515;GO:0005515;GO:0005886;GO:0005886;GO:0005886;GO:0006915;GO:0007275;GO:0008544;GO:0010628;GO:0016020;GO:0016021;GO:0030154;GO:0033209;GO:0038023;GO:0042475;GO:0043123;GO:0043473;GO:…	K05162	-	NOG43402	-	ectodysplasin A receptor [Source:HGNCSymbol;Acc:HGNC:2895]	10913	Q9UNE0
ENSG00000165029	17.5938	6.73634	28.4513	4.22356	2.07846	0.0156795	0.133812	9	104781006	104928155	-	11264	ABCA1	GO:0000166;GO:0002790;GO:0005102;GO:0005319;GO:0005515;GO:0005515;GO:0005515;GO:0005524;GO:0005524;GO:0005524;GO:0005524;GO:0005548;GO:0005768;GO:0005789;GO:0005794;GO:0005886;GO:0005886;GO:0005886;GO:0005886;GO:0005887;GO:0005887;GO:0006497;GO:0006629;GO:0006869;GO:0006911;GO:0007040;GO:0007186;GO:0007189;GO:0007584;GO:0008035;GO:0008202;GO:0008203;GO:0008203;GO:0008203;GO:0009897;GO:0009986;GO:…	K05641	-	COG1131	V	ATP binding cassette subfamily A member 1[Source:HGNC Symbol;Acc:HGNC:29]	19	O95477;B7XCW9;B2RUU2
ENSG00000141854	8.69274	3.36817	14.0173	4.1617	2.05717	0.0461766	0.278864	19	14072536	14075062	+	2354	MISP3	-	-	-	-	-	MISP family member 3 [Source:HGNCSymbol;Acc:HGNC:26963]	113230	Q96FF7
ENSG00000184486	20.3956	8.67574	32.1155	3.70176	1.88821	0.00326854	0.0420306	6	98834574	98839458	+	4885	POU3F2	GO:0000790;GO:0000978;GO:0000981;GO:0001228;GO:0001228;GO:0003677;GO:0003677;GO:0003677;GO:0003677;GO:0003700;GO:0003700;GO:0003700;GO:0003700;GO:0003700;GO:0003713;GO:0005515;GO:0005634;GO:0005634;GO:0005634;GO:0005634;GO:0005634;GO:0005654;GO:0005667;GO:0006355;GO:0006355;GO:0006357;GO:0006357;GO:0006357;GO:0006357;GO:0007399;GO:0007399;GO:0007420;GO:0007420;GO:0008284;GO:0008544;GO:0010629;GO:…	K09365	-	NOG261729	-	POU class 3 homeobox 2 [Source:HGNCSymbol;Acc:HGNC:9215]	5454	P20265
ENSG00000007944	136.413	58.7908	214.035	3.64062	1.86418	4.8347e-13	5.85074e-11	6	16129086	16148248	+	3072	MYLIP	GO:0000209;GO:0004842;GO:0004842;GO:0004842;GO:0005515;GO:0005515;GO:0005737;GO:0005829;GO:0005856;GO:0005856;GO:0005886;GO:0006511;GO:0006511;GO:0007399;GO:0008092;GO:0008092;GO:0008092;GO:0010977;GO:0010989;GO:0016020;GO:0016567;GO:0016740;GO:0031648;GO:0032802;GO:0032803;GO:0042632;GO:0045732;GO:0046872;GO:0061630;GO:0061630;GO:0005856;GO:0005856;	K10637	EC:2.3.2.27	NOG149394	S	myosin regulatory light chain interacting protein[Source:HGNC Symbol;Acc:HGNC:21155]	29116	Q8WY64
ENSG00000160318	18.666	8.7376	28.5944	3.27257	1.71042	0.0100948	0.0976392	19	51367098	51369003	-	1156	CLDND2	GO:0005886;GO:0016020;GO:0016021;GO:0016021;GO:0016021;GO:0016020;GO:0016021;GO:0005886;GO:0016020;GO:0016021;GO:0016021;GO:0016021;	-	-	NOG45853	S	claudin domain containing 2 [Source:HGNCSymbol;Acc:HGNC:28511]	125875	Q8NHS1
ENSG00000117114	14.0021	6.67448	21.3297	3.19571	1.67613	0.0326405	0.221737	1	81306147	81992436	+	22649	ADGRL2	GO:0004888;GO:0004888;GO:0004930;GO:0004930;GO:0004930;GO:0007165;GO:0007166;GO:0007166;GO:0007186;GO:0007186;GO:0007186;GO:0016020;GO:0016020;GO:0016020;GO:0016021;GO:0016021;GO:0016021;GO:0030246;GO:0030246;GO:0004888;GO:0004888;GO:0004930;GO:0004930;GO:0004930;GO:0007165;GO:0007166;GO:0007166;GO:0007186;GO:0007186;GO:0007186;GO:0016020;GO:0016020;GO:0016020;GO:0016021;GO:0016021;GO:0016021;GO:…	K04593	-	NOG253931	-	adhesion G protein-coupled receptor L2 [Source:HGNCSymbol;Acc:HGNC:18582]	23266	O95490
ENSG00000178826	37.2147	18.249	56.1805	3.07855	1.62225	0.000546512	0.00985173	7	143279957	143288048	+	2564	TMEM139	GO:0005515;GO:0016020;GO:0016021;GO:0005515;GO:0016020;GO:0016021;GO:0005515;GO:0016020;GO:0016021;GO:0005515;GO:0016020;GO:0016021;GO:0005515;GO:0016020;GO:0016021;	-	-	NOG42533	U	transmembrane protein 139 [Source:HGNCSymbol;Acc:HGNC:22058]	135932	Q8IV31
ENSG00000107984	830.657	418.474	1242.84	2.96993	1.57043	1.47515e-08	9.02859e-07	10	52314281	52318042	+	2221	DKK1	GO:0000122;GO:0000122;GO:0000904;GO:0001706;GO:0001707;GO:0001942;GO:0002090;GO:0005515;GO:0005515;GO:0005576;GO:0005576;GO:0005576;GO:0005576;GO:0005615;GO:0005615;GO:0005886;GO:0007275;GO:0007275;GO:0007275;GO:0007492;GO:0007611;GO:0007611;GO:0008083;GO:0010628;GO:0010628;GO:0010942;GO:0010977;GO:0016055;GO:0030111;GO:0030178;GO:0030178;GO:0030178;GO:0030178;GO:0030279;GO:0030279;GO:0030326;GO:…	K02165	-	NOG289067	-	dickkopf WNT signaling pathway inhibitor 1[Source:HGNC Symbol;Acc:HGNC:2891]	22943	O94907;I1W660
ENSG00000265763	92.6537	47.1544	138.153	2.9298	1.5508	0.000198074	0.00421845	10	47365496	47384293	-	3516	ZNF488	GO:0003676;GO:0003676;GO:0003677;GO:0003714;GO:0005515;GO:0005634;GO:0005634;GO:0005634;GO:0007399;GO:0014003;GO:0014003;GO:0031643;GO:0045892;GO:0045892;GO:0046872;GO:0048714;GO:0003676;GO:0003676;GO:0003677;GO:0003714;GO:0005515;GO:0005634;GO:0005634;GO:0007399;GO:0014003;GO:0045892;GO:0046872;	-	-	NOG323325	-	zinc finger protein 488 [Source:HGNCSymbol;Acc:HGNC:23535]	118738	Q96MN9
ENSG00000168646	183.127	93.7363	272.518	2.90728	1.53967	6.70755e-12	7.07511e-10	17	65528563	65561648	-	5227	AXIN2	GO:0001756;GO:0001934;GO:0001957;GO:0003139;GO:0003413;GO:0005515;GO:0005634;GO:0005634;GO:0005634;GO:0005737;GO:0005813;GO:0005813;GO:0005829;GO:0007275;GO:0008013;GO:0008283;GO:0008285;GO:0008285;GO:0010718;GO:0010942;GO:0016055;GO:0019899;GO:0030111;GO:0030282;GO:0030877;GO:0031625;GO:0031625;GO:0032423;GO:0034613;GO:0042476;GO:0043570;GO:0045668;GO:0048255;GO:0061181;GO:0070411;GO:0070602;GO:…	K04385	-	NOG238205	-	axin 2 [Source:HGNC Symbol;Acc:HGNC:904]"	8313	Q9Y2T1
ENSG00000211448	95.1862	49.4807	140.892	2.84741	1.50965	4.02018e-07	1.8191e-05	14	80197526	80387757	-	7393	DIO2	GO:0001514;GO:0004800;GO:0004800;GO:0004800;GO:0004800;GO:0005886;GO:0006590;GO:0006590;GO:0006590;GO:0008430;GO:0008430;GO:0016020;GO:0016021;GO:0016491;GO:0031625;GO:0033798;GO:0042403;GO:0042403;GO:0042446;GO:0055114;GO:0055114;GO:0055114;GO:0120162;GO:0004800;GO:0004800;GO:0016491;GO:0042446;GO:0055114;GO:0055114;GO:0055114;GO:0001514;GO:0004800;GO:0004800;GO:0004800;GO:0004800;GO:0004800;GO:…	K17904	EC:1.21.99.4	NOG146259	S	iodothyronine deiodinase 2 [Source:HGNCSymbol;Acc:HGNC:2884]	1734	Q92813
ENSG00000125378	29.5717	15.4121	43.7312	2.83747	1.5046	0.00402403	0.0493861	14	53949736	53958761	-	3096	BMP4	GO:0000122;GO:0000122;GO:0000122;GO:0000122;GO:0000186;GO:0001501;GO:0001503;GO:0001525;GO:0001568;GO:0001649;GO:0001649;GO:0001656;GO:0001657;GO:0001657;GO:0001658;GO:0001658;GO:0001707;GO:0001759;GO:0001822;GO:0001822;GO:0001823;GO:0001843;GO:0001934;GO:0001934;GO:0001938;GO:0001938;GO:0001944;GO:0001958;GO:0001958;GO:0002043;GO:0002062;GO:0002062;GO:0002244;GO:0002244;GO:0002320;GO:0003014;GO:…	K04662	-	NOG243555	-	bone morphogenetic protein 4 [Source:HGNCSymbol;Acc:HGNC:1071]	652	P12644;Q53XC5
ENSG00000254598	17.0179	9.04203	24.9938	2.76418	1.46685	0.0370662	0.240977	11	11351942	11353250	-	1309	CSNK2A3	GO:0000166;GO:0004672;GO:0004672;GO:0004674;GO:0004674;GO:0005515;GO:0005524;GO:0005524;GO:0005524;GO:0005634;GO:0005654;GO:0005829;GO:0005956;GO:0006468;GO:0006468;GO:0006468;GO:0008284;GO:0016301;GO:0016310;GO:0016740;GO:0018105;GO:0018107;GO:0030307;GO:0045732;GO:0051726;	K03097	EC:2.7.11.1	-	-	casein kinase 2 alpha 3 [Source:HGNCSymbol;Acc:HGNC:2458]	283106	Q8NEV1
ENSG00000173391	1720.42	926.961	2513.88	2.71196	1.43933	9.17506e-12	9.48556e-10	12	10158301	10172138	-	3057	OLR1	GO:0002376;GO:0005515;GO:0005576;GO:0005654;GO:0005886;GO:0005886;GO:0005886;GO:0005887;GO:0006508;GO:0006954;GO:0007155;GO:0008015;GO:0016020;GO:0016020;GO:0016021;GO:0030246;GO:0035579;GO:0042802;GO:0043231;GO:0043235;GO:0043312;GO:0045121;GO:0050900;GO:0070821;GO:0005654;GO:0005886;GO:0016020;GO:0016021;GO:0043231;GO:0002376;GO:0005515;GO:0005576;GO:0005654;GO:0005886;GO:0005886;GO:0005886;GO:…	K08763	-	NOG242244	-	oxidized low density lipoprotein receptor 1[Source:HGNC Symbol;Acc:HGNC:8133]	4973	P78380;A0A024RAU0
ENSG00000168874	51.2182	27.7604	74.676	2.69002	1.42762	0.0257684	0.189482	2	85751344	85791383	+	9296	ATOH8	GO:0000790;GO:0000981;GO:0001704;GO:0001704;GO:0001937;GO:0003677;GO:0003700;GO:0003700;GO:0003700;GO:0003700;GO:0005634;GO:0005634;GO:0005654;GO:0005737;GO:0005737;GO:0006355;GO:0006355;GO:0007275;GO:0007399;GO:0008134;GO:0010595;GO:0010629;GO:0016607;GO:0030154;GO:0030154;GO:0030154;GO:0033613;GO:0035148;GO:0045603;GO:0045892;GO:0045892;GO:0045893;GO:0046983;GO:0046983;GO:0051450;GO:0051450;GO:…	K09084	-	NOG311369	-	atonal bHLH transcription factor 8 [Source:HGNCSymbol;Acc:HGNC:24126]	84913	Q96SQ7
ENSG00000204335	53.5136	29.148	77.8792	2.67186	1.41784	0.000278546	0.00565459	2	170715337	170718078	+	2074	SP5	GO:0000122;GO:0000790;GO:0000977;GO:0000981;GO:0000981;GO:0001227;GO:0003676;GO:0003676;GO:0003677;GO:0005634;GO:0005634;GO:0006357;GO:0036342;GO:0043565;GO:0046872;GO:0060349;GO:0071407;	K09195	-	COG5048	R	Sp5 transcription factor [Source:HGNCSymbol;Acc:HGNC:14529]	389058	Q6BEB4
ENSG00000075461	39.3046	21.4522	57.157	2.66438	1.4138	0.00188997	0.0272684	17	66964707	67033398	+	3583	CACNG4	GO:0005244;GO:0005245;GO:0005245;GO:0005245;GO:0005246;GO:0005262;GO:0005886;GO:0005886;GO:0005887;GO:0005891;GO:0005891;GO:0006811;GO:0006816;GO:0006816;GO:0006816;GO:0009986;GO:0014069;GO:0016020;GO:0016020;GO:0016020;GO:0016021;GO:0016021;GO:0016021;GO:0019226;GO:0019226;GO:0030666;GO:0032281;GO:0032281;GO:0032281;GO:0032281;GO:0034765;GO:0035255;GO:0036477;GO:0042220;GO:0044297;GO:0051899;GO:…	K04869	-	NOG45952	M	calcium voltage-gated channel auxiliary subunitgamma 4 [Source:HGNC Symbol;Acc:HGNC:1408]	27092	Q9UBN1;A0A024R8J8
ENSG00000162878	93.4189	51.4201	135.418	2.63356	1.39701	3.07838e-06	0.000113609	2	42048021	42058517	+	3913	PKDCC	GO:0000166;GO:0001501;GO:0001503;GO:0004672;GO:0004672;GO:0004672;GO:0004672;GO:0004713;GO:0004715;GO:0004715;GO:0004715;GO:0004715;GO:0005524;GO:0005524;GO:0005524;GO:0005576;GO:0005576;GO:0005794;GO:0005794;GO:0006468;GO:0006468;GO:0007275;GO:0015031;GO:0016301;GO:0016310;GO:0016740;GO:0018108;GO:0018108;GO:0030154;GO:0030282;GO:0030501;GO:0030501;GO:0032332;GO:0032332;GO:0035108;GO:0035264;GO:…	K17548	EC:2.7.10.2	NOG254379	-	protein kinase domain containing, cytoplasmic[Source:HGNC Symbol;Acc:HGNC:25123]	91461	Q504Y2
ENSG00000142871	1577.23	878.771	2275.69	2.58962	1.37274	0.000196565	0.00420354	1	85580761	85583950	+	2443	CCN1	GO:0000166;GO:0001649;GO:0001934;GO:0002041;GO:0003181;GO:0003278;GO:0003281;GO:0005178;GO:0005178;GO:0005201;GO:0005515;GO:0005520;GO:0005520;GO:0005576;GO:0005576;GO:0005576;GO:0005788;GO:0006935;GO:0007155;GO:0007155;GO:0007155;GO:0007165;GO:0008201;GO:0008201;GO:0010518;GO:0010811;GO:0019838;GO:0030198;GO:0030335;GO:0030335;GO:0030501;GO:0030513;GO:0031012;GO:0033690;GO:0043065;GO:0043066;GO:…	K06829	-	NOG82014	R	cellular communication network factor 1 [Source:HGNCSymbol;Acc:HGNC:2654]	3491	O00622;Q6FI18
ENSG00000155893	230.8	130.229	331.37	2.54451	1.34739	3.52474e-11	3.2949e-09	3	141228726	141367753	+	13343	PXYLP1	GO:0000139;GO:0005515;GO:0005794;GO:0006024;GO:0010909;GO:0016020;GO:0016021;GO:0016311;GO:0016787;GO:0016791;GO:0050650;GO:0000139;GO:0005515;GO:0005794;GO:0006024;GO:0010909;GO:0016020;GO:0016021;GO:0016311;GO:0016787;GO:0016791;GO:0050650;	K21403	EC:3.1.3.-	NOG321954	-	2-phosphoxylose phosphatase 1 [Source:HGNCSymbol;Acc:HGNC:26303]	92370	Q8TE99;Q9NT50
ENSG00000078401	399.911	225.946	573.876	2.53988	1.34476	4.8725e-16	7.45731e-14	6	12290361	12297194	+	2035	EDN1	GO:0000122;GO:0001501;GO:0001516;GO:0001569;GO:0001666;GO:0001666;GO:0001701;GO:0001821;GO:0003100;GO:0005102;GO:0005125;GO:0005179;GO:0005515;GO:0005576;GO:0005576;GO:0005576;GO:0005576;GO:0005615;GO:0005615;GO:0005615;GO:0005623;GO:0005737;GO:0006885;GO:0007166;GO:0007186;GO:0007186;GO:0007193;GO:0007204;GO:0007204;GO:0007205;GO:0007267;GO:0007507;GO:0007585;GO:0007589;GO:0008217;GO:0008217;GO:…	K16366	-	NOG46593	S	endothelin 1 [Source:HGNC Symbol;Acc:HGNC:3176]"	1906	P05305;Q6FH53
ENSG00000104140	676.817	383.044	970.59	2.53389	1.34135	2.10549e-21	7.14539e-19	15	40872214	40874234	-	1650	RHOV	GO:0000166;GO:0003924;GO:0003924;GO:0003924;GO:0005515;GO:0005525;GO:0005525;GO:0005525;GO:0005525;GO:0005737;GO:0005768;GO:0005829;GO:0005856;GO:0005886;GO:0005886;GO:0005886;GO:0005938;GO:0006897;GO:0007015;GO:0007163;GO:0007264;GO:0007264;GO:0007266;GO:0008360;GO:0010008;GO:0016020;GO:0016477;GO:0019901;GO:0030031;GO:0030036;GO:0030865;GO:0031410;GO:0032488;GO:0032956;GO:0042995;GO:0043231;GO:…	K07866	-	COG1100	R	ras homolog family member V [Source:HGNCSymbol;Acc:HGNC:18313]	171177	Q96L33;A0A024R9R2
ENSG00000085563	61.1516	34.9043	87.3989	2.50396	1.32421	0.000288431	0.00583251	7	87503017	87713323	-	6422	ABCB1	GO:0000086;GO:0000166;GO:0005215;GO:0005515;GO:0005524;GO:0005524;GO:0005524;GO:0005524;GO:0005524;GO:0005886;GO:0005886;GO:0005886;GO:0005886;GO:0008559;GO:0009986;GO:0015562;GO:0016020;GO:0016020;GO:0016020;GO:0016021;GO:0016021;GO:0016021;GO:0016021;GO:0016324;GO:0016324;GO:0016324;GO:0016887;GO:0016887;GO:0016887;GO:0031625;GO:0042493;GO:0042626;GO:0042626;GO:0042626;GO:0042626;GO:0042910;GO:…	K05658	EC:7.6.2.2	COG1132	V	ATP binding cassette subfamily B member 1[Source:HGNC Symbol;Acc:HGNC:40]	5243	P08183;A4D1D2
ENSG00000136352	51.4721	29.416	73.5281	2.4996	1.32169	0.0312921	0.215104	14	36516392	36521149	-	3165	NKX2-1	GO:0000122;GO:0000790;GO:0000977;GO:0000978;GO:0000978;GO:0000981;GO:0001012;GO:0001161;GO:0003677;GO:0003677;GO:0003677;GO:0003700;GO:0003700;GO:0005515;GO:0005515;GO:0005634;GO:0005634;GO:0005654;GO:0006355;GO:0006355;GO:0007420;GO:0009725;GO:0010628;GO:0010719;GO:0019899;GO:0021759;GO:0030154;GO:0030324;GO:0030336;GO:0030512;GO:0030878;GO:0030900;GO:0042753;GO:0043565;GO:0043565;GO:0043565;GO:…	K09342	-	NOG328614	-	NK2 homeobox 1 [Source:HGNC Symbol;Acc:HGNC:11825]"	7080	P43699
ENSG00000182327	19.9884	11.4302	28.5467	2.49748	1.32047	0.0393516	0.251358	17	4788964	4790589	+	1217	GLTPD2	GO:0005737;GO:0005737;GO:0005829;GO:0008289;GO:0016020;GO:0035627;GO:0120009;GO:0120009;GO:0120009;GO:0120013;GO:0120013;GO:1902387;GO:1902388;GO:1902389;	-	-	NOG306612	-	glycolipid transfer protein domain containing 2[Source:HGNC Symbol;Acc:HGNC:33756]	388323	-
ENSG00000203883	35.0318	20.0441	50.0194	2.49547	1.31931	0.00614979	0.0678968	20	64047582	64049639	-	1862	SOX18	GO:0000122;GO:0000790;GO:0000790;GO:0000978;GO:0000981;GO:0000981;GO:0000981;GO:0001228;GO:0001525;GO:0001525;GO:0001525;GO:0001568;GO:0001570;GO:0001570;GO:0001570;GO:0001701;GO:0001942;GO:0001944;GO:0001944;GO:0001945;GO:0001946;GO:0001946;GO:0001946;GO:0001947;GO:0003151;GO:0003677;GO:0003677;GO:0003700;GO:0005634;GO:0005634;GO:0005634;GO:0006355;GO:0006355;GO:0007507;GO:0009653;GO:0022405;GO:…	K09270	-	NOG252325	-	SRY-box transcription factor 18 [Source:HGNCSymbol;Acc:HGNC:11194]	54345	P35713
ENSG00000145632	288.984	167.094	410.874	2.45894	1.29804	0.00119035	0.0189618	5	58453982	58460139	-	4647	PLK2	GO:0000082;GO:0000082;GO:0000166;GO:0000278;GO:0000278;GO:0000785;GO:0000922;GO:0004672;GO:0004672;GO:0004674;GO:0004674;GO:0004674;GO:0004674;GO:0004674;GO:0004674;GO:0005515;GO:0005515;GO:0005515;GO:0005524;GO:0005524;GO:0005524;GO:0005634;GO:0005737;GO:0005737;GO:0005737;GO:0005813;GO:0005813;GO:0005814;GO:0005814;GO:0005829;GO:0005856;GO:0006468;GO:0006468;GO:0006468;GO:0006468;GO:0006468;GO:…	K08861	EC:2.7.11.21	COG0515	T	polo like kinase 2 [Source:HGNCSymbol;Acc:HGNC:19699]	10769	Q9NYY3;A0A024QZV1
ENSG00000119280	915.196	531.233	1299.16	2.44555	1.29016	5.53233e-23	2.46758e-20	1	230837119	230869589	-	5161	C1orf198	GO:0005737;GO:0005829;GO:0005737;GO:0005829;GO:0005737;GO:0005829;	-	-	NOG27989	-	chromosome 1 open reading frame 198 [Source:HGNCSymbol;Acc:HGNC:25900]	84886	Q9H425;A0A024R3S1
ENSG00000163083	81.8377	47.8251	115.85	2.42237	1.27642	5.74646e-05	0.00152674	2	120346136	120351803	+	3206	INHBB	GO:0001541;GO:0005125;GO:0005125;GO:0005179;GO:0005179;GO:0005179;GO:0005515;GO:0005576;GO:0005576;GO:0005576;GO:0005576;GO:0005576;GO:0005615;GO:0006952;GO:0008083;GO:0008083;GO:0008083;GO:0009267;GO:0009267;GO:0009611;GO:0010862;GO:0030154;GO:0032869;GO:0032869;GO:0032924;GO:0042803;GO:0044320;GO:0044650;GO:0045444;GO:0045444;GO:0046676;GO:0046676;GO:0046789;GO:0046881;GO:0046882;GO:0048178;GO:…	K22687	-	NOG278663	-	inhibin subunit beta B [Source:HGNCSymbol;Acc:HGNC:6067]	3625	P09529
ENSG00000168952	73.5185	43.4769	103.56	2.38195	1.25214	0.000180395	0.00390588	14	24809656	25050297	-	8067	STXBP6	GO:0000145;GO:0005546;GO:0005737;GO:0005886;GO:0005912;GO:0006887;GO:0006893;GO:0016020;GO:0016021;GO:0016021;GO:0016192;GO:0016192;GO:0017049;GO:0035542;GO:0035542;GO:0035542;GO:0045920;GO:0051601;GO:0098609;GO:0098641;GO:0000145;GO:0005546;GO:0005737;GO:0005886;GO:0005912;GO:0006887;GO:0006893;GO:0016020;GO:0016021;GO:0016021;GO:0016192;GO:0016192;GO:0017049;GO:0035542;GO:0035542;GO:0035542;GO:…	K08519	-	NOG308736	-	syntaxin binding protein 6 [Source:HGNCSymbol;Acc:HGNC:19666]	29091	Q8NFX7
ENSG00000204174	28.3825	16.8409	39.9241	2.37067	1.24529	0.0181049	0.148338	10	46461099	46465958	-	2033	NPY4R	GO:0001602;GO:0004930;GO:0004930;GO:0004930;GO:0004930;GO:0004983;GO:0004983;GO:0005886;GO:0005886;GO:0005887;GO:0007165;GO:0007186;GO:0007186;GO:0007186;GO:0007186;GO:0007186;GO:0007218;GO:0016020;GO:0016020;GO:0016021;GO:0016021;GO:0016021;GO:0017046;GO:0001602;GO:0004930;GO:0004930;GO:0004930;GO:0004930;GO:0004983;GO:0004983;GO:0005886;GO:0005886;GO:0005887;GO:0007165;GO:0007186;GO:0007186;GO:…	K04206	-	NOG261951	-	neuropeptide Y receptor Y4 [Source:HGNCSymbol;Acc:HGNC:9329]	5540	P50391
ENSG00000057294	494.256	293.326	695.186	2.37002	1.2449	6.26027e-09	4.07205e-07	12	32790755	32896777	-	6970	PKP2	GO:0001533;GO:0002159;GO:0002934;GO:0005080;GO:0005080;GO:0005515;GO:0005515;GO:0005515;GO:0005634;GO:0005634;GO:0005654;GO:0005737;GO:0005882;GO:0005882;GO:0005886;GO:0005886;GO:0005886;GO:0005886;GO:0005886;GO:0005911;GO:0005911;GO:0005911;GO:0005912;GO:0007043;GO:0007155;GO:0007507;GO:0007507;GO:0010765;GO:0014704;GO:0014704;GO:0016021;GO:0017080;GO:0019215;GO:0019215;GO:0030054;GO:0030054;GO:…	K12642	-	NOG273513	-	plakophilin 2 [Source:HGNC Symbol;Acc:HGNC:9024]"	5318	Q99959
ENSG00000185483	38.5431	22.9222	54.1639	2.36294	1.24058	0.00670726	0.0723615	1	63774017	64181498	+	6720	ROR1	GO:0000166;GO:0001725;GO:0004672;GO:0004672;GO:0004714;GO:0005515;GO:0005515;GO:0005524;GO:0005524;GO:0005524;GO:0005737;GO:0005737;GO:0005886;GO:0005886;GO:0005887;GO:0005887;GO:0006468;GO:0006468;GO:0007169;GO:0007169;GO:0007275;GO:0007399;GO:0007605;GO:0009986;GO:0010976;GO:0014002;GO:0014068;GO:0016020;GO:0016021;GO:0016055;GO:0016301;GO:0016310;GO:0016740;GO:0017147;GO:0017147;GO:0018108;GO:…	K05122	EC:2.7.10.1	COG0515	T	receptor tyrosine kinase like orphan receptor 1[Source:HGNC Symbol;Acc:HGNC:10256]	4919	Q01973
ENSG00000205572	23.3746	13.9627	32.7865	2.34815	1.23153	0.035152	0.233613	5	70025247	70043113	+	3051	SERF1B	GO:0003674;GO:0005515;GO:0005634;GO:0005737;GO:0005829;GO:0007399;GO:0031648;GO:0032991;GO:1990000;GO:0003674;GO:0005515;GO:0005634;GO:0005737;GO:0005829;GO:0007399;GO:0031648;GO:0032991;GO:1990000;GO:0016020;GO:0016021;	-	-	KOG4488	S	small EDRK-rich factor 1B [Source:HGNCSymbol;Acc:HGNC:10756]	728492	O75920
ENSG00000189120	26.3205	15.7577	36.8833	2.34064	1.22691	0.0265711	0.193381	17	47844908	47855874	-	4045	SP6	GO:0000790;GO:0000981;GO:0000981;GO:0003676;GO:0003676;GO:0003677;GO:0005634;GO:0005634;GO:0006357;GO:0046872;GO:0000790;GO:0000981;GO:0000981;GO:0003676;GO:0003676;GO:0003677;GO:0005634;GO:0005634;GO:0005634;GO:0005829;GO:0006357;GO:0042481;GO:0046872;	K09196	-	COG5048	R	Sp6 transcription factor [Source:HGNCSymbol;Acc:HGNC:14530]	80320	Q3SY56;B3KXP2
ENSG00000165449	294.732	177.162	412.303	2.32727	1.21864	3.61183e-11	3.33635e-09	10	59650761	59736002	-	4429	SLC16A9	GO:0005515;GO:0005886;GO:0008028;GO:0015293;GO:0015718;GO:0016020;GO:0016021;GO:0016021;GO:0046415;GO:0055085;GO:0055085;GO:0005515;GO:0005886;GO:0008028;GO:0015293;GO:0015718;GO:0016020;GO:0016021;GO:0016021;GO:0046415;GO:0055085;GO:0055085;	K08186	-	COG0477	G	solute carrier family 16 member 9 [Source:HGNCSymbol;Acc:HGNC:23520]	220963	Q7RTY1
ENSG00000113396	23.8924	14.3908	33.394	2.3205	1.21444	0.0369355	0.240559	5	128538013	129033642	+	3133	SLC27A6	GO:0001676;GO:0003824;GO:0003824;GO:0004467;GO:0004467;GO:0015908;GO:0015908;GO:0016021;GO:0016021;GO:0031957;GO:0031957;GO:0000038;GO:0000166;GO:0001676;GO:0003824;GO:0003824;GO:0004467;GO:0004467;GO:0004467;GO:0004467;GO:0005324;GO:0005886;GO:0005886;GO:0006629;GO:0006631;GO:0006869;GO:0015908;GO:0015908;GO:0015909;GO:0016020;GO:0016021;GO:0016021;GO:0016021;GO:0016874;GO:0031957;GO:0031957;GO:…	K08749	-	COG0318	I	solute carrier family 27 member 6 [Source:HGNCSymbol;Acc:HGNC:11000]	28965	Q9Y2P4
ENSG00000206538	532.929	321.338	744.519	2.31693	1.21222	1.50558e-09	1.10866e-07	3	86876388	86991149	-	12740	VGLL3	GO:0000981;GO:0005634;GO:0005634;GO:0005634;GO:0005634;GO:0006355;GO:0006355;GO:0006357;GO:0000981;GO:0005634;GO:0005634;GO:0005634;GO:0005634;GO:0006355;GO:0006355;GO:0006357;GO:0005634;GO:0005634;GO:0006355;GO:0006355;	-	-	NOG39971	-	vestigial like family member 3 [Source:HGNCSymbol;Acc:HGNC:24327]	389136	A8MV65
ENSG00000118523	486.257	293.476	679.038	2.31378	1.21025	0.00119903	0.0190806	6	131948176	131951372	-	2338	CCN2	GO:0001502;GO:0001503;GO:0001525;GO:0001894;GO:0001934;GO:0001968;GO:0005178;GO:0005178;GO:0005515;GO:0005515;GO:0005520;GO:0005520;GO:0005520;GO:0005576;GO:0005576;GO:0005576;GO:0005576;GO:0005576;GO:0005615;GO:0005801;GO:0005829;GO:0005886;GO:0005938;GO:0006367;GO:0007155;GO:0007155;GO:0007160;GO:0007165;GO:0007229;GO:0007568;GO:0008022;GO:0008083;GO:0008201;GO:0008201;GO:0008201;GO:0008284;GO:…	K06827	-	NOG72934	S	cellular communication network factor 2 [Source:HGNCSymbol;Acc:HGNC:2500]	1490	P29279;Q5M8T4
ENSG00000154438	73.8876	45.0294	102.746	2.28175	1.19014	0.000320112	0.00630172	7	117363222	117428123	-	3049	ASZ1	GO:0005515;GO:0005737;GO:0005737;GO:0007140;GO:0007140;GO:0007275;GO:0007283;GO:0007283;GO:0030154;GO:0031047;GO:0034587;GO:0034587;GO:0034587;GO:0043046;GO:0043046;GO:0051321;GO:0071546;GO:0071546;GO:0071546;GO:0005515;	K18410	-	COG0666	R	ankyrin repeat, SAM and basic leucine zipper domaincontaining 1 [Source:HGNC Symbol;Acc:HGNC:1350]	136991	Q8WWH4
ENSG00000138623	75.6764	46.9276	104.425	2.22524	1.15396	0.000422734	0.00796055	15	74409289	74433958	-	3800	SEMA7A	GO:0001649;GO:0001755;GO:0001934;GO:0005178;GO:0005178;GO:0005515;GO:0005515;GO:0005615;GO:0005886;GO:0005886;GO:0005887;GO:0006954;GO:0006955;GO:0007229;GO:0007229;GO:0007229;GO:0007275;GO:0007399;GO:0009897;GO:0009897;GO:0009897;GO:0016020;GO:0021988;GO:0030154;GO:0030215;GO:0030215;GO:0030215;GO:0030335;GO:0031175;GO:0031225;GO:0045499;GO:0045773;GO:0045773;GO:0045773;GO:0048675;GO:0048843;GO:…	K06529	-	NOG277924	-	semaphorin 7A (John Milton Hagen blood group)[Source:HGNC Symbol;Acc:HGNC:10741]	8482	O75326;B3KMH6
ENSG00000165685	159.95	99.3895	220.51	2.21865	1.14968	0.0013582	0.0210315	12	10170542	10191801	+	3489	TMEM52B	GO:0003674;GO:0008150;GO:0016020;GO:0016021;GO:0070062;GO:0003674;GO:0008150;GO:0016020;GO:0016021;GO:0070062;GO:0016020;GO:0016021;	-	-	NOG26132	R	transmembrane protein 52B [Source:HGNCSymbol;Acc:HGNC:26438]	120939	Q4KMG9
ENSG00000284753	30.8488	19.229	42.4686	2.20857	1.14311	0.0336251	0.226742	3	184249672	184258759	+	975	EEF1AKMT4	GO:0008168;GO:0008168;GO:0008168;GO:0016279;GO:0016740;GO:0018022;GO:0032259;	K22857	EC:2.1.1.-	-	-	EEF1A lysine methyltransferase 4 [Source:HGNCSymbol;Acc:HGNC:53611]	110599564	P0DPD7
ENSG00000140284	404.551	253.65	555.453	2.18984	1.13083	5.12377e-12	5.47857e-10	15	50182196	50236385	+	2792	SLC27A2	GO:0000038;GO:0000166;GO:0001561;GO:0001561;GO:0001676;GO:0001676;GO:0003824;GO:0003824;GO:0003996;GO:0004467;GO:0004467;GO:0004467;GO:0004467;GO:0004467;GO:0004467;GO:0005324;GO:0005324;GO:0005324;GO:0005524;GO:0005777;GO:0005777;GO:0005778;GO:0005778;GO:0005778;GO:0005779;GO:0005779;GO:0005783;GO:0005783;GO:0005783;GO:0005788;GO:0005788;GO:0005789;GO:0005789;GO:0005829;GO:0005886;GO:0005886;GO:…	K08746	-	COG0318	I	solute carrier family 27 member 2 [Source:HGNCSymbol;Acc:HGNC:10996]	11001	O14975
ENSG00000179104	66.837	42.1306	91.5434	2.17285	1.11959	0.00126803	0.0200154	12	82686880	83134870	+	8323	TMTC2	GO:0000030;GO:0004169;GO:0005515;GO:0005515;GO:0005783;GO:0005783;GO:0005789;GO:0006486;GO:0016020;GO:0016021;GO:0016740;GO:0035269;GO:0055074;GO:0005515;GO:0016020;GO:0016021;GO:0005515;GO:0016020;GO:0016021;	K23424	EC:2.4.1.-	COG0457	R	transmembrane O-mannosyltransferase targetingcadherins 2 [Source:HGNC Symbol;Acc:HGNC:25440]	160335	Q8N394
ENSG00000130810	59.9211	38.0093	81.8329	2.15297	1.10633	0.037037	0.24091	19	10106362	10112012	+	2888	PPAN	GO:0000027;GO:0003723;GO:0005634;GO:0005634;GO:0005730;GO:0019843;GO:0030687;	K14859	-	NOG272199	-	peter pan homolog [Source:HGNCSymbol;Acc:HGNC:9227]	56342	Q9NQ55
ENSG00000165887	26.3803	16.7584	36.0021	2.14831	1.1032	0.0461103	0.278679	10	97572499	97583884	+	1451	ANKRD2	GO:0000122;GO:0000791;GO:0000791;GO:0001817;GO:0003682;GO:0005515;GO:0005634;GO:0005634;GO:0005634;GO:0005737;GO:0005737;GO:0005829;GO:0005829;GO:0006357;GO:0006936;GO:0007517;GO:0008307;GO:0010832;GO:0016605;GO:0016605;GO:0030016;GO:0030017;GO:0031432;GO:0031674;GO:0031674;GO:0035914;GO:0043231;GO:0043422;GO:0043422;GO:0043619;GO:0045662;GO:0045662;GO:0061629;GO:0061629;GO:1902253;GO:2000291;GO:…	K21434	-	COG0666	R	ankyrin repeat domain 2 [Source:HGNCSymbol;Acc:HGNC:495]	26287	Q9GZV1
ENSG00000182795	36.9178	23.4947	50.3408	2.14264	1.09939	0.0172414	0.143244	1	207018522	207032756	-	5501	C1orf116	GO:0003674;GO:0005515;GO:0005737;GO:0005737;GO:0005829;GO:0005886;GO:0008150;GO:0070062;GO:0003674;GO:0005515;GO:0005737;GO:0005737;GO:0005829;GO:0005886;GO:0008150;GO:0070062;	-	-	NOG28428	L	chromosome 1 open reading frame 116 [Source:HGNCSymbol;Acc:HGNC:28667]	79098	Q9BW04
ENSG00000150347	820.219	527.004	1113.43	2.11276	1.07913	6.02054e-16	9.12492e-14	10	61901684	62096944	+	8760	ARID5B	GO:0003713;GO:0003713;GO:0005634;GO:0005634;GO:0051091;GO:0051091;GO:0060612;GO:0060612;GO:1903508;GO:0000122;GO:0000977;GO:0001227;GO:0001822;GO:0001889;GO:0003677;GO:0003677;GO:0003677;GO:0003677;GO:0003713;GO:0003713;GO:0003713;GO:0005515;GO:0005515;GO:0005634;GO:0005634;GO:0005634;GO:0005634;GO:0005654;GO:0006357;GO:0006807;GO:0008584;GO:0008585;GO:0009791;GO:0010761;GO:0030325;GO:0035264;GO:…	-	-	NOG115121	S	AT-rich interaction domain 5B [Source:HGNCSymbol;Acc:HGNC:17362]	84159	Q14865
ENSG00000166823	100.996	64.9704	137.021	2.10898	1.07654	0.000169964	0.0037217	15	89748661	89751310	-	2369	MESP1	GO:0000790;GO:0000978;GO:0000978;GO:0000981;GO:0001228;GO:0001707;GO:0001756;GO:0001947;GO:0001947;GO:0003007;GO:0003007;GO:0003139;GO:0003139;GO:0003143;GO:0003143;GO:0003210;GO:0003211;GO:0003236;GO:0003236;GO:0003241;GO:0003241;GO:0003259;GO:0003259;GO:0003260;GO:0003677;GO:0003700;GO:0003700;GO:0003700;GO:0003700;GO:0005634;GO:0005634;GO:0005634;GO:0005634;GO:0007219;GO:0007275;GO:0007369;GO:…	K09076	-	NOG324147	-	mesoderm posterior bHLH transcription factor 1[Source:HGNC Symbol;Acc:HGNC:29658]	55897	Q9BRJ9
ENSG00000021645	173.114	112.145	234.083	2.08731	1.06165	2.67179e-06	0.000100263	14	78170373	79868290	+	15533	NRXN3	GO:0016020;GO:0016021;GO:0005886;GO:0005887;GO:0007155;GO:0007158;GO:0007411;GO:0007612;GO:0016020;GO:0016021;GO:0030534;GO:0035176;GO:0038023;GO:0046872;GO:0050839;GO:0071625;GO:0097109;GO:0005246;GO:0007268;GO:0007269;GO:0007416;GO:0016020;GO:0016021;GO:0032991;GO:0098793;GO:0098982;GO:2000300;GO:0005886;GO:0005887;GO:0007155;GO:0007158;GO:0007411;GO:0007612;GO:0016020;GO:0016021;GO:0030534;GO:…	K07377	-	NOG302266	-	neurexin 3 [Source:HGNC Symbol;Acc:HGNC:8010]"	9369	Q9HDB5
ENSG00000005102	50.1433	32.6811	67.6055	2.06864	1.04869	0.00813017	0.0835	17	43640389	43661922	-	2674	MEOX1	GO:0000790;GO:0000978;GO:0000981;GO:0001228;GO:0001757;GO:0003674;GO:0003677;GO:0003677;GO:0003677;GO:0003682;GO:0003700;GO:0003700;GO:0003700;GO:0003700;GO:0005515;GO:0005634;GO:0005634;GO:0005634;GO:0005737;GO:0005737;GO:0006355;GO:0006355;GO:0007275;GO:0007275;GO:0008150;GO:0043565;GO:0043565;GO:0043565;GO:0043565;GO:0045944;GO:0045944;GO:0045944;GO:0045944;GO:0060218;GO:0061053;GO:0061053;GO:…	K09322	-	NOG282563	-	mesenchyme homeobox 1 [Source:HGNCSymbol;Acc:HGNC:7013]	4222	P50221
ENSG00000176884	69.8164	45.5607	94.072	2.06476	1.04598	0.00200151	0.0285608	9	137139154	137168756	+	5959	GRIN1	GO:0000165;GO:0001540;GO:0004970;GO:0004970;GO:0004972;GO:0004972;GO:0004972;GO:0005216;GO:0005216;GO:0005262;GO:0005509;GO:0005515;GO:0005516;GO:0005623;GO:0005737;GO:0005886;GO:0005886;GO:0005886;GO:0005887;GO:0006811;GO:0006811;GO:0006811;GO:0006812;GO:0007268;GO:0007420;GO:0008021;GO:0008542;GO:0009986;GO:0009986;GO:0010524;GO:0014069;GO:0015276;GO:0015276;GO:0015276;GO:0016020;GO:0016020;GO:…	K05208	-	NOG282132	-	glutamate ionotropic receptor NMDA type subunit 1[Source:HGNC Symbol;Acc:HGNC:4584]	2902	Q05586
ENSG00000180264	37.3848	24.4129	50.3567	2.06271	1.04454	0.0229715	0.175358	9	124451425	124478589	+	5555	ADGRD2	GO:0004888;GO:0004888;GO:0004930;GO:0004930;GO:0004930;GO:0004930;GO:0004930;GO:0005887;GO:0007165;GO:0007166;GO:0007166;GO:0007186;GO:0007186;GO:0007186;GO:0007186;GO:0007189;GO:0016020;GO:0016021;GO:0016021;GO:0016021;GO:0016021;GO:0004888;GO:0004930;GO:0007166;GO:0007186;GO:0016020;GO:0016021;GO:0016021;GO:0004930;GO:0007186;GO:0016021;	K08466	-	NOG319967	-	adhesion G protein-coupled receptor D2 [Source:HGNCSymbol;Acc:HGNC:18651]	347088	-
ENSG00000171522	98.811	64.666	132.956	2.05604	1.03987	0.000308355	0.00611657	5	40679915	40693735	+	3544	PTGER4	GO:0004930;GO:0004930;GO:0004930;GO:0004955;GO:0004955;GO:0004957;GO:0004957;GO:0004957;GO:0004957;GO:0005515;GO:0005623;GO:0005886;GO:0005886;GO:0005886;GO:0006954;GO:0006955;GO:0007165;GO:0007186;GO:0007186;GO:0007186;GO:0007186;GO:0007188;GO:0007189;GO:0007204;GO:0007254;GO:0009612;GO:0016020;GO:0016021;GO:0016021;GO:0016021;GO:0030278;GO:0032496;GO:0033624;GO:0042093;GO:0042093;GO:0050710;GO:…	K04261	-	NOG295140	-	prostaglandin E receptor 4 [Source:HGNCSymbol;Acc:HGNC:9596]	5734	P35408;A0PJF5
ENSG00000137801	1102.8	722.989	1482.62	2.05068	1.0361	2.05426e-05	0.000621494	15	39581079	39599466	+	9158	THBS1	GO:0005615;GO:0005615;GO:0006954;GO:0006954;GO:0008201;GO:0008201;GO:0016525;GO:0016525;GO:0050840;GO:0050840;GO:0000187;GO:0001666;GO:0001786;GO:0001937;GO:0001937;GO:0001953;GO:0001953;GO:0001968;GO:0002040;GO:0002544;GO:0002576;GO:0002581;GO:0002605;GO:0005178;GO:0005201;GO:0005509;GO:0005509;GO:0005509;GO:0005515;GO:0005515;GO:0005515;GO:0005515;GO:0005515;GO:0005576;GO:0005576;GO:0005576;GO:…	K16857	-	NOG12793	-	thrombospondin 1 [Source:HGNCSymbol;Acc:HGNC:11785]	7057	P07996
ENSG00000174721	35.9634	23.6184	48.3083	2.04536	1.03236	0.0262732	0.191651	10	91906584	91909486	-	2553	FGFBP3	GO:0005576;GO:0005576;GO:0007267;GO:0008201;GO:0008201;GO:0017134;GO:0019838;GO:0019838;GO:0043117;GO:0045743;GO:0062023;	-	-	NOG41430	-	fibroblast growth factor binding protein 3[Source:HGNC Symbol;Acc:HGNC:23428]	143282	Q8TAT2
ENSG00000172061	37.1494	24.4541	49.8446	2.03829	1.02736	0.0254512	0.188213	3	194355249	194369743	-	5938	LRRC15	GO:0001968;GO:0005515;GO:0005518;GO:0005615;GO:0016020;GO:0016021;GO:0030335;GO:0031012;GO:0043236;GO:0046813;GO:0062023;GO:0070062;GO:1903077;GO:0001968;GO:0005515;GO:0005518;GO:0005615;GO:0016020;GO:0016021;GO:0030335;GO:0031012;GO:0043236;GO:0046813;GO:0062023;GO:0070062;GO:1903077;	-	-	COG4886	S	leucine rich repeat containing 15 [Source:HGNCSymbol;Acc:HGNC:20818]	131578	Q8TF66;B3KWI4
ENSG00000128709	56.0907	36.9262	75.2551	2.03799	1.02715	0.0061499	0.0678968	2	176122719	176124937	+	1871	HOXD9	GO:0000122;GO:0000790;GO:0000977;GO:0000978;GO:0000981;GO:0001227;GO:0003677;GO:0003677;GO:0003677;GO:0003677;GO:0003700;GO:0003700;GO:0005634;GO:0005634;GO:0005634;GO:0005634;GO:0005634;GO:0005654;GO:0005730;GO:0006351;GO:0006351;GO:0006355;GO:0006355;GO:0007275;GO:0007338;GO:0007519;GO:0008344;GO:0009952;GO:0009952;GO:0009954;GO:0009954;GO:0010468;GO:0030879;GO:0035115;GO:0035136;GO:0035137;GO:…	K09294	-	NOG286554	-	homeobox D9 [Source:HGNC Symbol;Acc:HGNC:5140]"	3235	P28356
ENSG00000196730	155.342	102.556	208.128	2.0294	1.02106	1.40511e-05	0.000450415	9	87497228	87708634	+	8908	DAPK1	GO:0000166;GO:0004672;GO:0004672;GO:0004672;GO:0004672;GO:0004674;GO:0004674;GO:0004674;GO:0004674;GO:0004683;GO:0005515;GO:0005515;GO:0005515;GO:0005516;GO:0005524;GO:0005524;GO:0005524;GO:0005524;GO:0005525;GO:0005634;GO:0005737;GO:0005856;GO:0005886;GO:0006417;GO:0006468;GO:0006468;GO:0006468;GO:0006915;GO:0006915;GO:0006915;GO:0006915;GO:0007165;GO:0007165;GO:0010506;GO:0010508;GO:0015629;GO:…	K08803	EC:2.7.11.1	COG0666	R	death associated protein kinase 1 [Source:HGNCSymbol;Acc:HGNC:2674]	1612	P53355
ENSG00000152465	165.537	109.412	221.662	2.02594	1.01859	0.0126738	0.115433	10	15102584	15168693	-	6470	NMT2	GO:0004379;GO:0004379;GO:0004379;GO:0004379;GO:0004379;GO:0005515;GO:0005737;GO:0005737;GO:0005794;GO:0005829;GO:0005829;GO:0005886;GO:0006499;GO:0006499;GO:0016020;GO:0016740;GO:0016746;GO:0018008;GO:0018008;GO:0019898;GO:0022400;GO:0043657;GO:0075733;GO:0004379;GO:0004379;GO:0004379;GO:0005794;GO:0005829;GO:0005886;GO:0006499;GO:0006499;GO:0016740;GO:0016746;	K00671	EC:2.3.1.97	COG5092	I	N-myristoyltransferase 2 [Source:HGNCSymbol;Acc:HGNC:7858]	9397	O60551
ENSG00000111678	32.3007	21.4935	43.1079	2.00563	1.00405	0.0429855	0.266058	12	6942978	6946003	+	1806	C12orf57	GO:0003674;GO:0005737;GO:0009791;GO:0014819;GO:0016607;GO:0021540;GO:0021678;GO:0036343;GO:0048593;GO:0050890;GO:0016607;GO:0016607;GO:0003674;GO:0005737;GO:0009791;GO:0014819;GO:0016607;GO:0021540;GO:0021678;GO:0036343;GO:0048593;GO:0050890;GO:0016607;	-	-	NOG87122	S	chromosome 12 open reading frame 57 [Source:HGNCSymbol;Acc:HGNC:29521]	113246	Q99622
